# Supplementary material for: An asymmetric allylic alkylation reaction of 3-alkylidene oxindoles
Source: Royal Society of Chemistry journal article supplement (doi:10.1039/c5cc06182b), 2015-01-01
Supplement: c5cc06182b1.pdf [file c5cc06182b1.pdf]

## Asymmetric allylic alkylations of 3-alkylidene oxindoles

Junjun Feng,<sup>a,b</sup> Xin Li<sup>a,b,\*</sup> and Jin-Pei Cheng<sup>b,c</sup>

<sup>a</sup> State Key Laboratory of Elemento-Organic Chemistry, Department of Chemistry, <sup>b</sup> Collaborative Innovation Center of Chemical Science and Engineering, Nankai University, Tianjin 300071, <sup>c</sup> Center of Basic Molecular Science, Department of Chemistry, Tsinghua University, Beijing 100084.

xin\_li@nankai.edu.cn

### Contents

|                                                                |     |
|----------------------------------------------------------------|-----|
| 1. General Information .....                                   | S2  |
| 2. General experimental reaction procedure.....                | S3  |
| 3. Results for other substrates.....                           | S10 |
| 4. X-ray crystallography data of <b>3h</b> .....               | S11 |
| 5. NMR Spectra ( <sup>1</sup> H NMR, <sup>13</sup> C NMR)..... | S12 |
| 6. Chiral HPLC Chromatography .....                            | S36 |

## 1. General Information

Commercial reagents were used as received, unless otherwise stated.  $^1\text{H}$  and  $^{13}\text{C}$  NMR were recorded on 400 MHz spectrometer. Chemical shifts are reported in ppm from tetramethylsilane with the solvent resonance as the internal standard. The following abbreviations were used to designate chemical shift multiplicities: s = singlet, d = doublet, t = triplet, q = quartet, m = multiplet. All first-order splitting patterns were assigned on the basis of the appearance of the multiplet. Splitting patterns that could not be easily interpreted are designated as multiplet (m). Mass spectra were obtained using electrospray ionization (ESI) or electron impact ionization (EI) mass spectrometer. In each case, enantiomeric ratio was determined by chiral HPLC analysis on Chiralcel column in comparison with authentic racemates. 3-Alkylidene oxindoles and isopropylidene benzofuran-2-one were synthesized according to the literature procedure.<sup>1</sup> MBH carbonates were synthesized by the reported method.<sup>2</sup>

### References:

- (1) (a) G. Rassa, V. Zambrano, R. Tanca, A. Sartori, L. Battistini, F. Zanardi, and C. Curti, G. Casiraghi, *Eur. J. Org. Chem.*, 2012, **3**, 466. (b) B. M. Trost, N. Cramer, and S. M. Silverman, *J. Am. Chem. Soc.*, 2007, **129**, 12396.
- (2) (a) M. Kamlar, S. Hybelbauerová, I. Císařová and J. Veselý, *Org. Biomol. Chem.*, 2014, **12**, 5071. (b) D. J. V. C. van Steenis, T. Marcelli, M. Lutz, A. L. Spek, J. H. van Maarseveen, and H. Hiemstra, *Adv. Synth. Catal.*, 2007, **349**, 281. (c) N.-J. Zhong, F. Wei, Q.-Q. Xuan, L. Liu, D. Wang and Y.-J. Chen, *Chem. Commun.*, 2013, **49**, 11071.

## 2. General experimental reaction procedure

To a stirred solution of (E)-*tert*-butyl 2-oxo-3-(1-phenylethylidene)indoline-1-carboxylate (1.5 equiv) and MBH carbonates (0.1 mmol) in dry PhCF<sub>3</sub> was added bismcinchona alkaloid catalyst (0.1 equiv) at 50 °C. After the reaction was complete, the reaction solution was concentrated in *vacuo*, the crude was purified by flash chromatography to afford the product.

### (E)-*tert*-butyl-3-(4-(methoxycarbonyl)-1,3-diphenylpent-4-en-1-ylidene)-2-oxoindoline-1-carboxylate(3a)

Light yellow oil. Yield 63%, ee 97%. <sup>1</sup>H NMR (400 MHz, CDCl<sub>3</sub>) δ 7.70 (d, *J* = 8.2 Hz, 1H), 7.43 (s, 3H), 7.23 – 7.16 (m, 4H), 7.12 (dd, *J* = 14.1, 5.9 Hz, 2H), 7.04 (s, 1H), 6.90 (s, 1H), 6.65 (t, *J* = 7.7 Hz, 1H), 6.31 (s, 1H), 5.96 (d, *J* = 7.9 Hz, 1H), 5.86 (s, 1H), 4.14 (dd, *J* = 17.2, 10.8 Hz, 1H), 4.00 – 3.89 (m, 2H), 3.61 (s, 3H), 1.68 (s, 9H); <sup>13</sup>C NMR (100 MHz, CDCl<sub>3</sub>) δ 167.1, 166.1, 158.6, 149.3, 142.5, 141.7, 139.7, 138.1, 129.2, 128.7, 128.5, 128.3, 126.9, 126.6, 125.9, 123.3, 123.0, 123.0, 114.2, 84.2, 51.8, 44.3, 38.0, 28.2; HRMS (ESI<sup>+</sup>) calcd for [C<sub>32</sub>H<sub>31</sub>NO<sub>5</sub>+Na]<sup>+</sup> 532.2094, found: 532.2094. [α]<sup>20</sup><sub>D</sub> -15.9° (c = 2.0, CHCl<sub>3</sub>); The enantiomeric excess was determined by HPLC with an IC column at 210 nm (2-propanol: hexane=2:98), 1.0 mL/min; t<sub>R</sub> = 20.2 min (minor), 21.6 min (major).

### (E)-*tert*-butyl-3-(4-(methoxycarbonyl)-1-(4-methoxyphenyl)-3-phenylpent-4-en-1-ylidene)-2-oxoindoline-1-carboxylate(3b)

Light yellow oil. Yield 54%, ee >99%. <sup>1</sup>H NMR (400 MHz, CDCl<sub>3</sub>) δ 7.76 (d, *J* = 8.1 Hz, 1H), 7.32 (s, 1H), 7.28 (d, *J* = 12.7 Hz, 3H), 7.23 – 7.15 (m, 2H), 7.01 (s, 3H), 6.93 (d, *J* = 8.5 Hz, 1H), 6.76 (t, *J* = 7.7 Hz, 1H), 6.37 (s, 1H), 6.21 (d, *J* = 7.9 Hz, 1H), 5.91 (s, 1H), 4.14 (td, *J* = 11.3, 7.4 Hz, 1H), 4.08 – 3.99 (m, 2H), 3.95 (s, 3H), 3.67 (s, 3H), 1.75 (s, 9H); <sup>13</sup>C NMR (100 MHz, CDCl<sub>3</sub>) δ 167.2, 166.3, 160.0, 159.0, 149.4, 142.7, 141.8, 138.1, 131.9, 128.6, 128.4, 128.3, 126.7, 126.0, 123.9, 123.4, 123.4, 123.0, 114.6, 114.3, 84.3, 55.4, 51.9, 44.7, 38.1, 28.3; HRMS (ESI<sup>+</sup>) calcd for [C<sub>33</sub>H<sub>33</sub>NO<sub>6</sub>+Na]<sup>+</sup> 562.2200, found: 562.2195; [α]<sup>20</sup><sub>D</sub> -24.3° (c = 0.6, CHCl<sub>3</sub>); The enantiomeric excess was determined by HPLC with an AS-H column at 210 nm (2-propanol: hexane=2:98), 1.0 mL/min; t<sub>R</sub> = 8.2 min (major).

### (E)-*tert*-butyl-3-(4-(methoxycarbonyl)-3-phenyl-1-(*p*-tolyl)pent-4-en-1-ylidene)-2-oxoindoline-1-carboxylate(3c)

Light yellow oil. Yield 61%, ee >99%. <sup>1</sup>H NMR (400 MHz, CDCl<sub>3</sub>) δ 7.76 (d, *J* = 8.2 Hz, 1H), 7.33 – 7.25 (m, 6H), 7.19 (dt, *J* = 15.6, 5.5 Hz, 2H), 7.00 (d, *J* = 6.4 Hz, 1H), 6.88 (dd, *J* = 16.5, 7.0 Hz, 1H), 6.73 (t, *J* = 7.7 Hz, 1H), 6.37 (s, 1H), 6.12 (d, *J* = 7.9 Hz, 1H), 5.92 (s, 1H), 4.18 (dd, *J* = 17.0, 11.1 Hz, 1H), 4.06 – 3.93 (m, 2H), 3.66 (s, 3H), 2.50 (s, 3H), 1.74 (s, 9H); <sup>13</sup>C NMR (100 MHz, CDCl<sub>3</sub>) δ 167.2, 166.3, 159.2, 149.4, 142.7, 141.8, 138.7, 138.1, 136.7, 129.9, 128.6, 128.5, 128.3, 126.9, 126.7, 126.0, 123.8, 123.3, 123.3, 123.1, 114.2, 84.3, 51.8, 44.5, 38.1, 28.3; [α]<sup>20</sup><sub>D</sub> -29.0° (c = 0.8, CHCl<sub>3</sub>); HRMS (ESI<sup>+</sup>) calcd for [C<sub>33</sub>H<sub>33</sub>NO<sub>5</sub>+Na]<sup>+</sup> 546.2251, found: 546.2250. The enantiomeric excess was determined by HPLC with an AS-H column at 210 nm (2-propanol: hexane=2:98), 1.0 mL/min; t<sub>R</sub> = 5.1 min (major).

**(E)-tert-butyl-3-(1-(4-chlorophenyl)-4-(methoxycarbonyl)-3-phenylpent-4-en-1-ylidene)-2-oxindoline-1-carboxylate(3d)**

Light yellow oil. Yield 44%, ee 95%. <sup>1</sup>H NMR (400 MHz, CDCl<sub>3</sub>) δ 7.72 (d, *J* = 8.3 Hz, 1H), 7.47 – 7.35 (m, 2H), 7.25 – 7.11 (m, 6H), 7.00 (t, *J* = 9.9 Hz, 1H), 6.83 (d, *J* = 8.1 Hz, 1H), 6.71 (t, *J* = 7.7 Hz, 1H), 6.31 (s, 1H), 6.05 (d, *J* = 7.9 Hz, 1H), 5.80 (s, 1H), 4.02 (d, *J* = 8.1 Hz, 2H), 3.93 (t, *J* = 8.0 Hz, 1H), 3.63 (s, 3H), 1.69 (s, 9H); <sup>13</sup>C NMR (100 MHz, CDCl<sub>3</sub>) δ 167.1, 166.0, 156.9, 149.3, 142.7, 141.4, 138.4, 138.2, 134.8, 129.5, 128.9, 128.6, 128.4, 126.8, 126.1, 124.3, 123.5, 123.0, 122.8, 114.4, 84.4, 77.5, 77.2, 76.8, 51.9, 44.5, 37.9, 28.3; HRMS (ESI<sup>+</sup>) calcd for [C<sub>32</sub>H<sub>30</sub>ClNO<sub>5</sub>+Na]<sup>+</sup> 566.1705, found: 566.1700; [α]<sup>20</sup><sub>D</sub> -15.0° (c = 0.9, CHCl<sub>3</sub>); The enantiomeric excess was determined by HPLC with an AD-H column at 210 nm (2-propanol: hexane=2:98), 1.0 mL/min; t<sub>R</sub> = 7.6 min (minor), 6.9 min (major).

**(E)-tert-butyl-3-(1-(3-chlorophenyl)-4-(methoxycarbonyl)-3-phenylpent-4-en-1-ylidene)-2-oxindoline-1-carboxylate(3e)**

Light yellow oil. Yield 42%, ee 97%. <sup>1</sup>H NMR (400 MHz, CDCl<sub>3</sub>) δ 7.73 (d, *J* = 8.2 Hz, 1H), 7.38 (dt, *J* = 14.7, 7.7 Hz, 2H), 7.25 – 7.11 (m, 6H), 6.94 (t, *J* = 10.3 Hz, 1H), 6.83 (d, *J* = 9.3 Hz, 1H), 6.71 (t, *J* = 7.7 Hz, 1H), 6.33 (d, *J* = 7.0 Hz, 1H), 6.01 (t, *J* = 7.6 Hz, 1H), 5.83 (s, 1H), 4.18 – 4.02 (m, 1H), 3.90 (ddd, *J* = 22.4, 16.1, 8.4 Hz, 2H), 3.64 (d, *J* = 8.1 Hz, 3H), 1.69 (s, 9H); <sup>13</sup>C NMR (100 MHz, CDCl<sub>3</sub>) δ 166.9, 165.9, 156.2, 149.2, 142.5, 141.6, 141.3, 138.3, 135.1, 130.6, 128.9, 128.8, 128.5, 128.4, 128.3, 127.2, 127.1, 126.8, 125.9, 125.8, 125.2, 124.3, 123.5, 122.9, 122.6, 114.4, 84.4, 51.9, 44.3, 38.1, 37.7; HRMS (ESI<sup>+</sup>) calcd for [C<sub>32</sub>H<sub>30</sub>ClNO<sub>5</sub>+Na]<sup>+</sup> 566.1705, found: 566.1702; [α]<sup>20</sup><sub>D</sub> -29.0° (c = 0.8, CHCl<sub>3</sub>); The enantiomeric excess was determined by HPLC with an IC column at 210 nm (2-propanol: hexane=2:98), 1.0 mL/min; t<sub>R</sub> = 16.1 min (minor), 17.2 min (major).

**(E)-tert-butyl-3-(1-(3-bromophenyl)-4-(methoxycarbonyl)-3-phenylpent-4-en-1-ylidene)-2-oxindoline-1-carboxylate(3f)**

Light yellow oil. Yield 53%, ee >99%. <sup>1</sup>H NMR (400 MHz, CDCl<sub>3</sub>) δ 7.72 (t, *J* = 8.6 Hz, 1H), 7.57 (d, *J* = 8.0 Hz, 1H), 7.35 – 7.28 (m, 1H), 7.26 – 7.04 (m, 7H), 6.98 (d, *J* = 6.1 Hz, 1H), 6.72 (t, *J* = 7.7 Hz, 1H), 6.33 (d, *J* = 10.7 Hz, 1H), 6.01 (t, *J* = 7.8 Hz, 1H), 5.83 (d, *J* = 7.6 Hz, 1H), 4.18 – 3.76 (m, 3H), 3.64 (d, *J* = 10.5 Hz, 3H), 1.69 (s, 9H); <sup>13</sup>C NMR (100 MHz, CDCl<sub>3</sub>) δ 166.9, 165.9, 156.1, 149.2, 142.5, 141.9, 141.6, 141.3, 141.2, 138.3, 131.7, 130.8, 130.0, 129.9, 128.9, 128.5, 128.5, 128.4, 128.3, 126.9, 126.8, 126.0, 125.8, 125.6, 125.5, 123.5, 123.0, 122.5, 114.4, 84.4, 52.0, 51.9, 44.3, 38.2, 37.7, 28.2; HRMS (ESI<sup>+</sup>) calcd for [C<sub>32</sub>H<sub>30</sub>BrNO<sub>5</sub>+Na]<sup>+</sup> 610.1200, found: 610.1198; [α]<sup>20</sup><sub>D</sub> -25.0° (c = 1.3, CHCl<sub>3</sub>); The enantiomeric excess was determined by HPLC with an IA column at 210 nm (2-propanol: hexane=2:98), 1.0 mL/min; t<sub>R</sub> = 7.5 min (major).

**(E)-tert-butyl-5-chloro-3-(4-(methoxycarbonyl)-1,3-diphenylpent-4-en-1-ylidene)-2-oxindoline-1-carboxylate(3g)**

Light yellow oil. Yield 46%, ee 95%. <sup>1</sup>H NMR (400 MHz, CDCl<sub>3</sub>) δ 7.66 (d, *J* = 8.7 Hz, 1H), 7.50 – 7.42 (m, 3H), 7.25 – 7.13 (m, 5H), 7.08 (dd, *J* = 8.7, 1.9 Hz, 1H), 7.03 (d, *J* = 4.4 Hz, 1H), 6.88 (d, *J* = 6.9 Hz, 1H), 6.31 (s, 1H), 5.83 (s, 2H), 4.11 (dd, *J* = 17.3, 10.6 Hz, 1H), 3.98 (q, *J* = 8.2 Hz, 2H), 3.61 (s, 3H), 1.68 (s, 9H); <sup>13</sup>C NMR (100 MHz, CDCl<sub>3</sub>) δ 167.1, 165.6, 160.7, 149.3, 142.7, 141.6, 139.2, 136.7, 129.5, 129.2, 128.9, 128.6, 128.4, 128.3, 126.8, 126.0, 124.6, 123.2, 123.2, 115.4, 84.7, 51.9, 44.5, 38.2, 28.3; HRMS (ESI<sup>+</sup>) calcd for [C<sub>32</sub>H<sub>30</sub>ClNO<sub>5</sub>+Na]<sup>+</sup> 566.1705, found: 566.1700; [α]<sup>20</sup><sub>D</sub> -32.1°

(*c* = 0.6, CHCl<sub>3</sub>); The enantiomeric excess was determined by HPLC with an IA column at 210 nm (2-propanol: hexane=2:98), 1.0 mL/min; *t<sub>R</sub>* = 7.7 min (minor), 6.7 min (major).

**(E)-tert-butyl-3-(3-(4-fluorophenyl)-4-(methoxycarbonyl)-1-phenylpent-4-en-1-ylidene)-2-oxindoline-1-carboxylate(3h)**

White solid. Yield 46%, ee 95%. <sup>1</sup>H NMR (400 MHz, CDCl<sub>3</sub>) δ 7.70 (d, *J* = 8.2 Hz, 1H), 7.44 (s, 3H), 7.19 – 7.09 (m, 3H), 7.06 (s, 1H), 6.89 (t, *J* = 8.5 Hz, 3H), 6.66 (t, *J* = 7.7 Hz, 1H), 6.30 (s, 1H), 5.98 (d, *J* = 7.9 Hz, 1H), 5.82 (s, 1H), 4.10 – 3.89 (m, 3H), 3.61 (s, 3H), 1.68 (s, 9H); <sup>13</sup>C NMR (101 MHz, CDCl<sub>3</sub>) δ 166.9, 166.1, 162.9, 160.4, 158.1, 142.6, 139.6, 138.1, 137.2, 137.2, 130.1, 123.0, 129.3, 128.8, 128.6, 127.0, 126.8, 125.7, 123.9, 123.3, 123.0, 122.9, 115.1, 114.9, 114.20, 84.3, 51.8, 43.7, 37.9, 28.2; HRMS (ESI<sup>+</sup>) calcd for [C<sub>32</sub>H<sub>30</sub>FNO<sub>5</sub>+Na]<sup>+</sup> 550.2000, found: 550.2000; [α]<sup>20</sup><sub>D</sub> -32.2° (*c* = 1.6, CHCl<sub>3</sub>); The enantiomeric excess was determined by HPLC with an AD-H column at 210 nm (2-propanol: hexane=2:98), 1.0 mL/min; *t<sub>R</sub>* = 7.9 min (major), 9.6 min (minor).

**(E)-tert-butyl-3-(3-(4-chlorophenyl)-4-(methoxycarbonyl)-1-phenylpent-4-en-1-ylidene)-2-oxindoline-1-carboxylate(3i)**

Light yellow oil. Yield 76%, ee 94%. <sup>1</sup>H NMR (400 MHz, CDCl<sub>3</sub>) δ 7.70 (d, *J* = 4.2 Hz, 1H), 7.44 (s, 3H), 7.16 (d, *J* = 9.2 Hz, 5H), 7.06 (s, 1H), 6.91 (s, 1H), 6.66 (s, 1H), 6.31 (s, 1H), 5.98 (s, 1H), 5.83 (s, 1H), 4.13 – 4.03 (m, 1H), 3.95 (d, *J* = 15.5 Hz, 2H), 3.61 (s, 3H), 1.68 (s, 9H); <sup>13</sup>C NMR (100 MHz, CDCl<sub>3</sub>) δ 167.0, 166.3, 158.0, 149.4, 142.5, 140.2, 139.7, 138.3, 132.5, 130.1, 129.2, 129.0, 128.8, 128.5, 126.9, 126.0, 124.2, 123.4, 123.1, 123.0, 114.4, 84.4, 52.0, 44.0, 37.8, 28.4; HRMS (ESI<sup>+</sup>) calcd for [C<sub>32</sub>H<sub>30</sub>ClNO<sub>5</sub>+Na]<sup>+</sup> 566.1705, found: 566.1702; [α]<sup>20</sup><sub>D</sub> -27.6° (*c* = 1.0, CHCl<sub>3</sub>); The enantiomeric excess was determined by HPLC with an AD-H column at 210 nm (2-propanol: hexane=3:97), 1.0 mL/min; *t<sub>R</sub>* = 8.7 min (minor), 6.8 min (major).

**(E)-tert-butyl-3-(4-(methoxycarbonyl)-3-(4-nitrophenyl)-1-phenylpent-4-en-1-ylidene)-2-oxindoline-1-carboxylate(3j)**

Light yellow oil. Yield 51%, ee 91%. <sup>1</sup>H NMR (400 MHz, CDCl<sub>3</sub>) δ 8.06 (d, *J* = 8.4 Hz, 2H), 7.70 (d, *J* = 7.9 Hz, 1H), 7.50 – 7.31 (m, 5H), 7.12 (dd, *J* = 17.8, 9.6 Hz, 2H), 6.94 (s, 1H), 6.67 (t, *J* = 7.6 Hz, 1H), 6.38 (s, 1H), 6.02 (d, *J* = 7.8 Hz, 1H), 5.91 (s, 1H), 4.19 – 3.94 (m, 3H), 3.61 (s, 3H), 1.68 (s, 9H); <sup>13</sup>C NMR (100 MHz, CDCl<sub>3</sub>) δ 166.6, 166.3, 156.8, 149.6, 149.3, 147.0, 141.6, 139.5, 138.4, 129.6, 129.2, 129.0, 127.2, 126.7, 124.5, 123.6, 123.1, 122.8, 114.4, 84.6, 52.1, 44.5, 37.64, 28.3; HRMS (ESI<sup>+</sup>) calcd for [C<sub>32</sub>H<sub>30</sub>N<sub>2</sub>O<sub>7</sub>+Na]<sup>+</sup> 577.1945, found: 577.1946; [α]<sup>20</sup><sub>D</sub> -53.5° (*c* = 1.2, CHCl<sub>3</sub>); The enantiomeric excess was determined by HPLC with an AD-H column at 210 nm (2-propanol: hexane=2:98), 1.0 mL/min; *t<sub>R</sub>* = 32.6 min (minor), 19.1 min (major).

**(E)-tert-butyl-3-(4-(methoxycarbonyl)-1-phenyl-3-(*m*-tolyl)pent-4-en-1-ylidene)-2-oxindoline-1-carboxylate(3k)**

Light yellow oil. Yield 40%, ee 95%. <sup>1</sup>H NMR (400 MHz, CDCl<sub>3</sub>) δ 7.70 (d, *J* = 8.2 Hz, 1H), 7.43 (s, 3H), 7.15 – 6.99 (m, 6H), 6.92 (d, *J* = 6.6 Hz, 1H), 6.65 (t, *J* = 7.7 Hz, 1H), 6.29 (s, 1H), 5.95 (d, *J* = 7.9 Hz, 1H), 5.85 (s, 1H), 4.11 (dd, *J* = 13.8, 7.2 Hz, 1H), 3.99 – 3.87 (m, 2H), 3.60 (s, 3H), 2.28 (s, 3H), 1.69 (s, 9H); <sup>13</sup>C NMR (100 MHz, CDCl<sub>3</sub>) δ 167.2, 166.2, 158.9, 149.5, 142.9, 139.8, 138.8, 138.2, 136.2, 129.2, 129.1, 128.8, 128.6, 128.5, 127.0, 125.9, 123.9, 123.4, 123.2, 123.1, 114.3, 84.3, 51.9, 44.1, 38.1, 28.4, 21.2; HRMS (ESI<sup>+</sup>) calcd for [C<sub>33</sub>H<sub>33</sub>NO<sub>5</sub>+Na]<sup>+</sup> 546.2251, found: 546.2250;

$[\alpha]^{20}_{\text{D}}$  -31.3° ( $c = 0.9$ ,  $\text{CHCl}_3$ ); The enantiomeric excess was determined by HPLC with an AD-H column at 210 nm (2-propanol: hexane=2:98), 1.0 mL/min;  $t_{\text{R}} = 9.4$  min (minor), 7.7 min (major).

**(E)-tert-butyl-3-(3-(3-chlorophenyl)-4-(methoxycarbonyl)-1-phenylpent-4-en-1-ylidene)-2-oxindoline-1-carboxylate(3l)**

Light yellow oil. Yield 53%, ee 88%.  $^1\text{H}$  NMR (400 MHz,  $\text{CDCl}_3$ )  $\delta$  7.72 (d,  $J = 8.2$  Hz, 1H), 7.44 (d,  $J = 3.9$  Hz, 3H), 7.18 – 7.08 (m, 5H), 7.05 (s, 1H), 6.96 (s, 1H), 6.67 (t,  $J = 7.7$  Hz, 1H), 6.35 (s, 1H), 6.00 (d,  $J = 7.9$  Hz, 1H), 5.90 (s, 1H), 4.16 (dd,  $J = 13.7, 7.3$  Hz, 1H), 3.97 – 3.82 (m, 2H), 3.61 (s, 3H), 1.69 (s, 9H);  $^{13}\text{C}$  NMR (100 MHz,  $\text{CDCl}_3$ )  $\delta$  166.7, 166.0, 157.7, 149.3, 143.8, 141.8, 139.5, 138.2, 134.0, 129.5, 129.2, 128.8, 128.6, 126.9, 126.8, 126.6, 126.3, 124.0, 123.3, 123.0, 122.9, 114.2, 84.3, 51.8, 44.1, 37.9, 28.2; HRMS (ESI<sup>+</sup>) calcd for  $[\text{C}_{32}\text{H}_{30}\text{ClNO}_5 + \text{Na}]^+$  566.1705, found: 566.1704;  $[\alpha]^{20}_{\text{D}}$  -35.8° ( $c = 1.0$ ,  $\text{CHCl}_3$ ); The enantiomeric excess was determined by HPLC with an OD-H column at 210 nm (2-propanol: hexane=1:99), 1.0 mL/min;  $t_{\text{R}} = 10.7$  min (minor), 8.9 min (major).

**(E)-tert-butyl-3-(3-(3-bromophenyl)-4-(methoxycarbonyl)-1-phenylpent-4-en-1-ylidene)-2-oxindoline-1-carboxylate(3m)**

Light yellow oil. Yield 85%, ee 91%.  $^1\text{H}$  NMR (400 MHz,  $\text{CDCl}_3$ )  $\delta$  7.72 (d,  $J = 8.2$  Hz, 1H), 7.44 (d,  $J = 4.3$  Hz, 3H), 7.30 (d,  $J = 7.5$  Hz, 2H), 7.17 – 7.01 (m, 4H), 6.96 (s, 1H), 6.67 (t,  $J = 7.7$  Hz, 1H), 6.35 (s, 1H), 6.00 (d,  $J = 7.9$  Hz, 1H), 5.90 (s, 1H), 4.15 (dd,  $J = 13.5, 7.2$  Hz, 1H), 3.95 – 3.81 (m, 2H), 3.61 (s, 3H), 1.69 (s, 9H);  $^{13}\text{C}$  NMR (100 MHz,  $\text{CDCl}_3$ )  $\delta$  166.8, 166.2, 157.8, 149.4, 144.2, 141.9, 139.6, 138.3, 131.7, 129.9, 129.9, 129.3, 129.0, 128.8, 127.2, 127.0, 126.4, 124.2, 123.4, 123.1, 123.0, 122.4, 114.4, 84.4, 52.0, 44.3, 38.0, 28.3; HRMS (ESI<sup>+</sup>) calcd for  $[\text{C}_{32}\text{H}_{30}\text{BrNO}_5 + \text{Na}]^+$  610.1200, found: 610.1195;  $[\alpha]^{20}_{\text{D}}$  -28.1° ( $c = 0.7$ ,  $\text{CHCl}_3$ ); The enantiomeric excess was determined by HPLC with an AD-H column at 210 nm (2-propanol: hexane=2:98), 1.0 mL/min;  $t_{\text{R}} = 7.0$  min (minor), 8.0 min (major).

**(E)-tert-butyl-3-(4-(methoxycarbonyl)-3-(3-nitrophenyl)-1-phenylpent-4-en-1-ylidene)-2-oxindoline-1-carboxylate(3n)**

Light yellow oil. Yield 79%, ee 89%.  $^1\text{H}$  NMR (400 MHz,  $\text{CDCl}_3$ )  $\delta$  8.01 (d,  $J = 7.5$  Hz, 2H), 7.72 (d,  $J = 8.2$  Hz, 1H), 7.60 (d,  $J = 7.6$  Hz, 1H), 7.48 – 7.35 (m, 4H), 7.13 (t,  $J = 7.8$  Hz, 1H), 7.09 – 6.94 (m, 2H), 6.67 (t,  $J = 7.7$  Hz, 1H), 6.39 (s, 1H), 6.04 (d,  $J = 7.9$  Hz, 1H), 5.95 (s, 1H), 4.13 – 3.97 (m, 3H), 3.60 (s, 3H), 1.68 (s, 9H);  $^{13}\text{C}$  NMR (100 MHz,  $\text{CDCl}_3$ )  $\delta$  166.6, 166.1, 156.9, 149.3, 148.23, 144.0, 141.6, 139.6, 138.4, 134.9, 129.4, 129.2, 129.0, 127.1, 126.7, 124.4, 123.7, 123.5, 123.1, 122.8, 121.9, 114.4, 84.5, 52.1, 44.4, 37.9, 28.3; HRMS (ESI<sup>+</sup>) calcd for  $[\text{C}_{32}\text{H}_{30}\text{N}_2\text{O}_7 + \text{Na}]^+$  577.1945, found: 577.1945;  $[\alpha]^{20}_{\text{D}}$  -47.7° ( $c = 1.2$ ,  $\text{CHCl}_3$ ); The enantiomeric excess was determined by HPLC with an AD-H column at 210 nm (2-propanol: hexane=2:98), 1.0 mL/min;  $t_{\text{R}} = 28.2$  min (minor), 16.1 min (major).

**(E)-tert-butyl-3-(3-(2-bromophenyl)-4-(methoxycarbonyl)-1-phenylpent-4-en-1-ylidene)-2-oxindoline-1-carboxylate(3o)**

Light yellow oil. Yield 92%, ee 94%.  $^1\text{H}$  NMR (400 MHz,  $\text{CDCl}_3$ )  $\delta$  7.73 (d,  $J = 8.2$  Hz, 1H), 7.48 – 7.37 (m, 5H), 7.24 (dd,  $J = 13.8, 6.3$  Hz, 1H), 7.13 (t,  $J = 7.6$  Hz, 2H), 7.04 (t,  $J = 7.6$  Hz, 1H), 6.83 (d,  $J = 7.1$  Hz, 1H), 6.67 (t,  $J = 7.7$  Hz, 1H), 6.40 (s, 1H), 5.97 (d,  $J = 7.9$  Hz, 1H), 5.73 (s, 1H), 4.35 (t,  $J = 8.0$  Hz, 1H), 4.16 (dd,  $J = 15.5, 8.1$  Hz, 1H), 3.87 (dd,  $J = 15.6, 8.0$  Hz, 1H), 3.63 (s, 3H), 1.69 (s,

9H);  $^{13}\text{C}$  NMR (100 MHz,  $\text{CDCl}_3$ )  $\delta$  166.9, 166.4, 158.7, 149.4, 141.4, 140.8, 138.9, 138.2, 133.1, 129.6, 129.4, 129.2, 128.8, 128.6, 128.3, 127.6, 127.3, 126.8, 125.3, 123.9, 123.5, 123.1, 114.3, 84.4, 52.0, 43.6, 36.9, 28.3; HRMS (ESI<sup>+</sup>) calcd for  $[\text{C}_{32}\text{H}_{30}\text{BrNO}_5+\text{Na}]^+$  610.1200, found: 610.1196;  $[\alpha]^{20}\text{D}$  21.8° ( $c = 1.2$ ,  $\text{CHCl}_3$ ); The enantiomeric excess was determined by HPLC with an AD-H column at 210 nm (2-propanol: hexane=2:98), 1.0 mL/min;  $t_{\text{R}} = 6.1$  min (minor), 7.2 min (major).

**(E)-tert-butyl-3-(3-(3,4-dichlorophenyl)-4-(methoxycarbonyl)-1-phenylpent-4-en-1-ylidene)-2-oxoindoline-1-carboxylate(3p)**

Light yellow oil. Yield 85%, ee 90%.  $^1\text{H}$  NMR (400 MHz,  $\text{CDCl}_3$ )  $\delta$  7.72 (d,  $J = 8.2$  Hz, 1H), 7.41 (dd,  $J = 18.9, 7.3$  Hz, 4H), 7.29 (s, 1H), 7.14 (dd,  $J = 15.2, 7.8$  Hz, 3H), 6.83 (d,  $J = 7.0$  Hz, 1H), 6.67 (t,  $J = 7.7$  Hz, 1H), 6.38 (s, 1H), 5.99 (d,  $J = 7.9$  Hz, 1H), 5.72 (s, 1H), 4.33 (t,  $J = 8.0$  Hz, 1H), 4.10 (dd,  $J = 15.3, 7.8$  Hz, 1H), 3.89 (dd,  $J = 15.3, 8.3$  Hz, 1H), 3.64 (s, 3H), 1.69 (s, 9H);  $^{13}\text{C}$  NMR (100 MHz,  $\text{CDCl}_3$ )  $\delta$  166.7, 166.4, 158.1, 149.4, 141.1, 138.9, 138.3, 138.0, 135.0, 133.1, 130.4, 129.5, 129.0, 128.8, 127.4, 127.3, 124.1, 123.5, 123.2, 123.0, 114.4, 84.5, 52.1, 40.6, 36.7, 28.3; HRMS (ESI<sup>+</sup>) calcd for  $[\text{C}_{32}\text{H}_{29}\text{Cl}_2\text{NO}_5+\text{Na}]^+$  600.1315, found: 600.1314;  $[\alpha]^{20}\text{D}$  -0.4° ( $c = 1.1$ ,  $\text{CHCl}_3$ ); The enantiomeric excess was determined by HPLC with an OD-H column at 210 nm (2-propanol: hexane=1:99), 1.0 mL/min;  $t_{\text{R}} = 11.5$  min (minor), 9.8 min (major).

**(E)-tert-butyl-3-(3-(2,4-dichlorophenyl)-4-(methoxycarbonyl)-1-phenylpent-4-en-1-ylidene)-2-oxoindoline-1-carboxylate(3q)**

Light yellow oil. Yield 88%, ee 93%.  $^1\text{H}$  NMR (400 MHz,  $\text{CDCl}_3$ )  $\delta$  7.72 (d,  $J = 8.2$  Hz, 1H), 7.45 (d,  $J = 5.3$  Hz, 3H), 7.27 (d,  $J = 8.3$  Hz, 2H), 7.14 (t,  $J = 7.9$  Hz, 1H), 7.07 (d,  $J = 8.2$  Hz, 2H), 6.96 (s, 1H), 6.67 (t,  $J = 7.7$  Hz, 1H), 6.34 (s, 1H), 6.02 (d,  $J = 7.9$  Hz, 1H), 5.88 (s, 1H), 4.07 – 3.87 (m, 3H), 3.61 (s, 3H), 1.68 (s, 9H).  $^{13}\text{C}$  NMR (100 MHz,  $\text{CDCl}_3$ )  $\delta$  166.6, 166.1, 157.2, 149.2, 142.0, 141.7, 139.5, 138.3, 132.1, 130.6, 130.5, 130.1, 129.2, 129.0, 128.8, 127.9, 126.9, 126.2, 124.2, 123.3, 123.0, 122.8, 114.3, 84.3, 51.9, 43.7, 37.7, 28.2. HRMS (ESI<sup>+</sup>) calcd for  $[\text{C}_{32}\text{H}_{29}\text{Cl}_2\text{NO}_5+\text{Na}]^+$  600.1315, found: 600.1313.  $[\alpha]^{20}\text{D}$  -45.0° ( $c = 1.1$ ,  $\text{CHCl}_3$ ); The enantiomeric excess was determined by HPLC with an AD-H column at 210 nm (2-propanol: hexane=3:97), 1.0 mL/min;  $t_{\text{R}} = 7.7$  min (minor), 6.0 min (major).

**(E)-tert-butyl-3-(3-(2-bromophenyl)-1-(3-chlorophenyl)-4-(methoxycarbonyl)pent-4-en-1-ylidene)-2-oxoindoline-1-carboxylate(3r)**

Light yellow oil. Yield 92%, ee 87%.  $^1\text{H}$  NMR (400 MHz,  $\text{CDCl}_3$ )  $\delta$  7.74 (d,  $J = 8.2$  Hz, 1H), 7.49 (dd,  $J = 12.5, 8.0$  Hz, 1H), 7.37 (dd,  $J = 22.0, 9.8$  Hz, 3H), 7.25 – 7.12 (m, 2H), 7.09 – 6.99 (m, 2H), 6.81 – 6.67 (m, 2H), 6.40 (d,  $J = 14.9$  Hz, 1H), 6.08 – 6.00 (m, 1H), 5.71 (s, 1H), 4.34 (dt,  $J = 24.8, 8.0$  Hz, 1H), 4.12 (td,  $J = 14.8, 7.8$  Hz, 1H), 3.82 (ddd,  $J = 37.1, 15.5, 8.3$  Hz, 1H), 3.66 (d,  $J = 13.7$  Hz, 3H), 1.69 (s, 9H);  $^{13}\text{C}$  NMR (100 MHz,  $\text{CDCl}_3$ )  $\delta$  166.7, 166.1, 156.1, 155.9, 149.2, 141.2, 141.0, 140.7, 140.4, 140.3, 138.2, 135.2, 135.0, 133.1, 133.0, 130.7, 130.5, 129.4, 129.3, 128.9, 128.8, 128.3, 127.5, 127.3, 127.1, 126.9, 125.2, 125.1, 124.9, 124.3, 124.2, 123.5, 123.0, 122.5, 114.4, 84.4, 52.0, 51.9, 43.4, 43.2, 36.9, 36.6, 28.2; HRMS (ESI<sup>+</sup>) calcd for  $[\text{C}_{32}\text{H}_{29}\text{BrClNO}_5+\text{NH}_4]^+$  639.1256, found: 641.1243;  $[\alpha]^{20}\text{D}$  +7.0° ( $c = 1.2$ ,  $\text{CHCl}_3$ ); The enantiomeric excess was determined by HPLC with an OD-H column at 210 nm (2-propanol: hexane=2:98), 1.0 mL/min;  $t_{\text{R}} = 12.3$  min (minor), 16.0 min (major).

**(E)-tert-butyl-3-(3-(2-bromophenyl)-1-(3-bromophenyl)-4-(methoxycarbonyl)pent-4-en-1-ylidene)**

**)-2-oxoindoline-1-carboxylate(3s)**

Light yellow oil. Yield 87%, ee 88%. <sup>1</sup>H NMR (400 MHz, CDCl<sub>3</sub>) δ 7.74 (d, *J* = 8.2 Hz, 1H), 7.58 (d, *J* = 7.8 Hz, 1H), 7.49 (dd, *J* = 15.0, 7.9 Hz, 1H), 7.34 (ddd, *J* = 24.3, 14.7, 7.6 Hz, 2H), 7.20 (dd, *J* = 19.0, 9.5 Hz, 2H), 7.15 – 7.01 (m, 2H), 6.94 – 6.79 (m, 1H), 6.73 (t, *J* = 7.7 Hz, 1H), 6.45 – 6.36 (m, 1H), 6.05 (t, *J* = 7.2 Hz, 1H), 5.71 (d, *J* = 9.3 Hz, 1H), 4.33 (dt, *J* = 32.5, 7.9 Hz, 1H), 4.20 – 4.05 (m, 1H), 3.94 – 3.69 (m, 1H), 3.66 (d, *J* = 16.6 Hz, 3H), 1.68 (s, 9H); <sup>13</sup>C NMR (100 MHz, CDCl<sub>3</sub>) δ 166.8, 166.1, 156.1, 155.8, 149.2, 141.2, 141.1, 140.7, 140.3, 138.2, 133.1, 131.8, 130.7, 129.9, 129.3, 128.9, 128.3, 127.3, 125.4, 123.6, 123.0, 114.4, 84.5, 52.0, 43.4, 36.6, 28.2; HRMS (ESI<sup>+</sup>) calcd for [C<sub>32</sub>H<sub>29</sub>Br<sub>2</sub>NO<sub>5</sub>+NH<sub>4</sub>]<sup>+</sup> 683.0751, found: 683.0717; [α]<sup>20</sup><sub>D</sub> +3.69° (c = 1.3, CHCl<sub>3</sub>); The enantiomeric excess was determined by HPLC with an OD-H column at 210 nm (2-propanol: hexane=2:98), 1.0 mL/min; t<sub>R</sub> = 11.5 min (minor), 14.9 min (major).

**(E)-tert-butyl-3-(3-(4-chlorophenyl)-4-(ethoxycarbonyl)-1-phenylpent-4-en-1-ylidene)-2-oxoindoline-1-carboxylate(3t)**

Light yellow oil. Yield 41%, ee 94%. <sup>1</sup>H NMR (400 MHz, CDCl<sub>3</sub>) δ 7.70 (d, *J* = 8.2 Hz, 1H), 7.44 (s, 3H), 7.22 – 7.09 (m, 5H), 7.07 (s, 1H), 6.90 (d, *J* = 6.5 Hz, 1H), 6.66 (t, *J* = 7.7 Hz, 1H), 6.31 (s, 1H), 5.98 (d, *J* = 7.9 Hz, 1H), 5.80 (s, 1H), 4.13 – 4.02 (m, 3H), 4.02 – 3.87 (m, 2H), 1.68 (s, 9H), 1.17 (t, *J* = 7.1 Hz, 3H); <sup>13</sup>C NMR (100 MHz, CDCl<sub>3</sub>) δ 166.4, 166.1, 158.0, 149.2, 142.6, 140.2, 139.5, 138.2, 132.3, 123.0, 129.3, 128.8, 128.6, 128.3, 126.8, 125.7, 124.0, 123.3, 123.0, 122.9, 120.8, 114.2, 84.3, 60.7, 43.8, 37.7, 28.2, 14.1; HRMS (ESI<sup>+</sup>) calcd for [C<sub>33</sub>H<sub>32</sub>ClNO<sub>5</sub>+Na]<sup>+</sup> 580.1861, found: 580.1861; [α]<sup>20</sup><sub>D</sub> -68.9° (c = 0.7, CHCl<sub>3</sub>); The enantiomeric excess was determined by HPLC with an AD-H column at 210 nm (2-propanol: hexane=2:98), 1.0 mL/min; t<sub>R</sub> = 9.7 min (minor), 7.4 min (major).

**(Z)-tert-butyl-3-(4-(3-chlorophenyl)-5-(methoxycarbonyl)hex-5-en-2-ylidene)-2-oxoindoline-1-carboxylate(3u)**

Light yellow oil. Yield 56%, ee 94%. <sup>1</sup>H NMR (400 MHz, CDCl<sub>3</sub>) δ 7.81 (d, *J* = 8.2 Hz, 1H), 7.48 (d, *J* = 7.8 Hz, 1H), 7.29 (d, *J* = 7.7 Hz, 2H), 7.20 – 7.08 (m, 4H), 6.38 (s, 1H), 5.87 (s, 1H), 4.32 (t, *J* = 7.9 Hz, 1H), 3.89 (dd, *J* = 12.6, 6.9 Hz, 1H), 3.65 (s, 3H), 3.41 (dd, *J* = 12.5, 9.1 Hz, 1H), 2.15 (s, 3H), 1.66 (s, 9H); <sup>13</sup>C NMR (100 MHz, CDCl<sub>3</sub>) δ 167.0, 165.5, 157.3, 149.3, 144.1, 141.9, 138.1, 134.1, 129.6, 128.2, 126.9, 126.5, 125.7, 123.8, 123.7, 123.4, 114.5, 84.2, 52.0, 44.9, 40.2, 28.2, 24.1; HRMS (ESI<sup>+</sup>) calcd for [C<sub>27</sub>H<sub>28</sub>ClNO<sub>5</sub>+H]<sup>+</sup> 482.1729, found: 482.1734; [α]<sup>20</sup><sub>D</sub> -37.8° (c = 0.33, CHCl<sub>3</sub>); The enantiomeric excess was determined by HPLC with an AD-H column at 210 nm (2-propanol: hexane=3:97), 1.0 mL/min; t<sub>R</sub> = 7.4 min (minor), 8.1 min (major).

**Dimethyl-5-(1-(tert-butoxycarbonyl)-2-oxoindolin-3-ylidene)-2,8-dimethylene-3,7-diphenylnonanedioate(3v)**

Light yellow oil. Yield 60%, ee 89%. <sup>1</sup>H NMR (400 MHz, CDCl<sub>3</sub>) δ 7.86 (d, *J* = 8.2 Hz, 1H), 7.35 – 7.27 (m, 2H), 7.25 – 7.18 (m, 5H), 7.05 (ddd, *J* = 22.7, 15.5, 7.4 Hz, 6H), 6.32 (s, 1H), 6.25 (s, 1H), 5.41 (s, 2H), 4.06 (dd, *J* = 13.8, 9.4 Hz, 2H), 3.84 – 3.68 (m, 2H), 3.66 – 3.59 (m, 1H), 3.57 (d, *J* = 11.4 Hz, 6H), 2.92 (dd, *J* = 13.1, 4.4 Hz, 1H), 1.68 (s, 9H); <sup>13</sup>C NMR (100 MHz, CDCl<sub>3</sub>) δ 167.0, 166.5, 165.3, 162.1, 149.3, 142.5, 142.3, 142.3, 140.9, 138.4, 128.6, 128.4, 128.3, 128.1, 128.0, 127.1, 126.6, 124.3, 124.2, 124.0, 123.9, 123.3, 122.8, 114.7, 84.3, 52.0, 51.7, 45.5, 44.2, 41.2, 39.8, 28.2; HRMS (ESI<sup>+</sup>) calcd for [C<sub>38</sub>H<sub>39</sub>NO<sub>7</sub>+Na]<sup>+</sup> 644.2619, found: 644.2612; [α]<sup>20</sup><sub>D</sub> -271.1° (c = 0.4, CHCl<sub>3</sub>); The enantiomeric excess was determined by HPLC with an AD-H column at 210 nm (2-propanol:



hexane=1:19), 1.0 mL/min;  $t_R$ = 11.2 min (minor), 4.6 min (major).

**(Z)-methyl 2-methylene-5-(2-oxobenzofuran-3(2H)-ylidene)-3-phenylhexanoate(5)**

Light yellow oil. Yield 60%, ee 40%.  $^1\text{H}$  NMR (400 MHz,  $\text{CDCl}_3$ )  $\delta$  7.45 (d,  $J$  = 7.7 Hz, 1H), 7.33 – 7.26 (m, 3H), 7.25 – 7.14 (m, 3H), 7.14 – 7.06 (m, 2H), 6.35 (s, 1H), 5.81 (s, 1H), 4.41 – 4.33 (m, 1H), 3.72 (dd,  $J$  = 12.8, 6.8 Hz, 1H), 3.66 (s, 3H), 3.53 (dd,  $J$  = 12.8, 9.3 Hz, 1H), 2.21 (s, 3H);  $^{13}\text{C}$  NMR (100 MHz,  $\text{CDCl}_3$ )  $\delta$  167.2, 166.7, 160.7, 152.5, 142.5, 141.2, 128.9, 128.7, 128.4, 128.1, 127.8, 126.9, 125.3, 124.3, 123.7, 123.5, 119.7, 110.6, 51.9, 44.9, 39.8, 22.9; HRMS (ESI $^+$ ) calcd for  $[\text{C}_{27}\text{H}_{22}\text{O}_4+\text{H}]^+$  349.1434, found: 349.1429.  $[\alpha]^{20}\text{D}$  -12.9 $^\circ$  ( $c$  = 0.5,  $\text{CHCl}_3$ ); The enantiomeric excess was determined by HPLC with an OD-H column at 210 nm (2-propanol: hexane=2:98), 1.0 mL/min;  $t_R$ = 20.8 min (minor), 30.7 min (major).

**(Z)-methyl 2-methylene-5-(2-oxobenzofuran-3(2H)-ylidene)-3-phenylhexanoate(6)**

Orange powder. Yield 40%, ee 15%.  $^1\text{H}$  NMR (400 MHz,  $\text{CDCl}_3$ )  $\delta$  7.63 (d,  $J$  = 8.2 Hz, 1H), 7.51 (s, 1H), 7.44 – 7.34 (m, 2H), 7.29 (d,  $J$  = 9.1 Hz, 2H), 7.25 – 7.13 (m, 5H), 7.06 (t,  $J$  = 7.2 Hz, 2H), 6.86 (t,  $J$  = 7.5 Hz, 1H), 6.58 (t,  $J$  = 7.7 Hz, 1H), 6.51 (d,  $J$  = 7.8 Hz, 1H), 6.40 (s, 2H), 6.18 (s, 1H), 5.91 (d,  $J$  = 7.9 Hz, 1H), 5.50 (d,  $J$  = 13.4 Hz, 1H), 4.58 (d,  $J$  = 15.7 Hz, 1H), 3.62 (d,  $J$  = 15.8 Hz, 1H), 3.49 (d,  $J$  = 13.4 Hz, 1H), 3.27 (s, 3H), 1.66 (s, 9H);  $^{13}\text{C}$  NMR (100 MHz,  $\text{CDCl}_3$ )  $\delta$  176.7, 166.2, 166.0, 155.4, 149.2, 143.4, 140.3, 138.2, 135.9, 130.7, 129.4, 129.2, 128.7, 128.5, 128.3, 127.8, 127.8, 127.3, 125.3, 124.5, 123.1, 123.0, 122.9, 122.2, 114.1, 108.7, 84.2, 54.7, 51.6, 44.0, 37.4, 28.2; HRMS (ESI $^+$ ) calcd for  $[\text{C}_{40}\text{H}_{36}\text{N}_2\text{O}_6+\text{Na}]^+$  641.2652, found: 641.2639;  $[\alpha]^{20}\text{D}$  +10.8 $^\circ$  ( $c$  = 0.3,  $\text{CHCl}_3$ ); The enantiomeric excess was determined by HPLC with an IA column at 210 nm (2-propanol: hexane=1:4), 1.0 mL/min;  $t_R$ = 19.1 min (minor), 13.1 min (major).

### 3. Results for other examples and large scale.

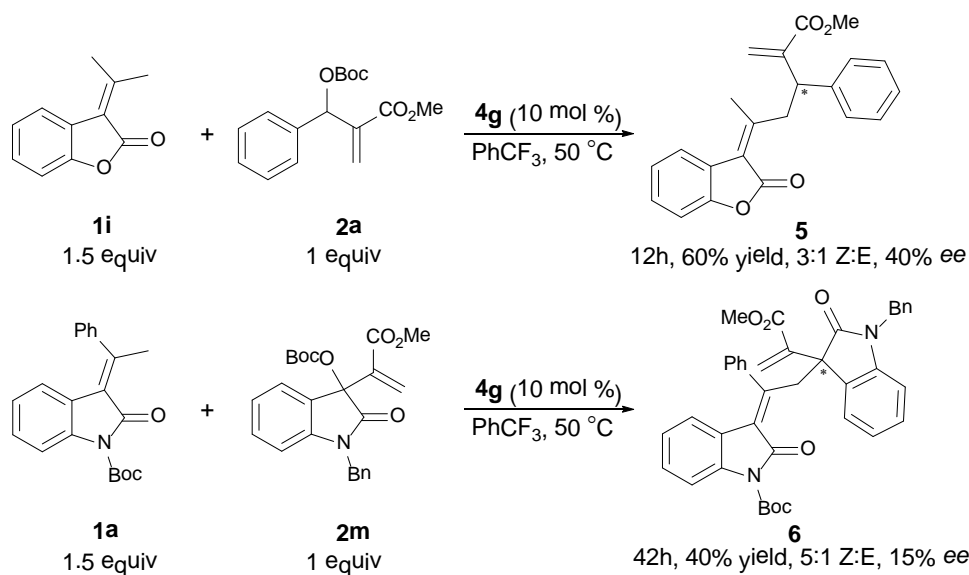

Scheme S1

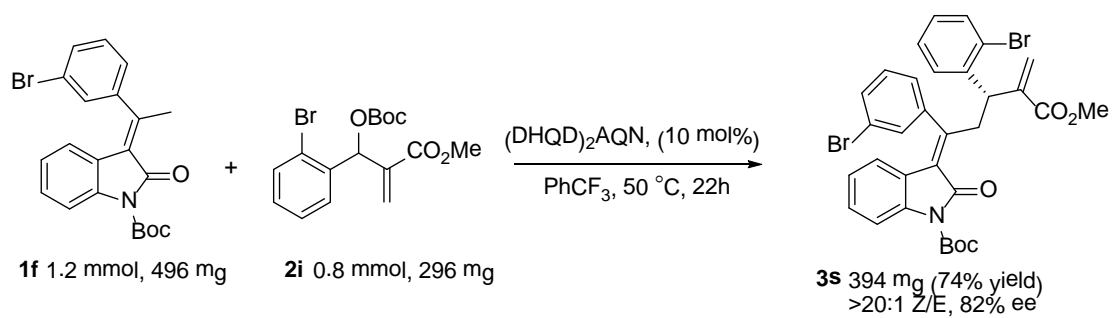

Scheme S2

#### 4. X-ray crystallography data of 3h.

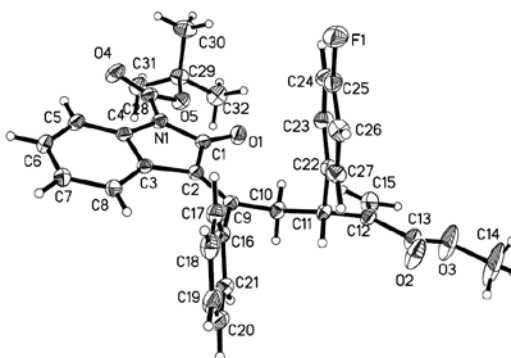

Figure S1 ORTEP diagram showing of compound 3h.

Table 1. Crystal data and structure refinement for shelxl.

|                                   |                                                                                                                       |
|-----------------------------------|-----------------------------------------------------------------------------------------------------------------------|
| Identification code               | shelxl                                                                                                                |
| Empirical formula                 | C <sub>32</sub> H <sub>30</sub> F N O <sub>5</sub>                                                                    |
| Formula weight                    | 527.57                                                                                                                |
| Temperature                       | 173(2) K                                                                                                              |
| Wavelength                        | 1.54187 Å                                                                                                             |
| Crystal system, space group       | Monoclinic, P2(1)                                                                                                     |
| Unit cell dimensions              | a = 11.665(2) Å    alpha = 90 deg.<br>b = 18.047(3) Å    beta = 106.488(5) deg.<br>c = 13.710(3) Å    gamma = 90 deg. |
| Volume                            | 2767.5(9) Å <sup>3</sup>                                                                                              |
| Z, Calculated density             | 4, 1.266 Mg/m <sup>3</sup>                                                                                            |
| Absorption coefficient            | 0.735 mm <sup>-1</sup>                                                                                                |
| F(000)                            | 1112                                                                                                                  |
| Crystal size                      | 0.220 x 0.200 x 0.120 mm                                                                                              |
| Theta range for data collection   | 6.302 to 79.251 deg.                                                                                                  |
| Limiting indices                  | -13<=h<=10, -22<=k<=22, -17<=l<=17                                                                                    |
| Reflections collected / unique    | 46860 / 11424 [R(int) = 0.0298]                                                                                       |
| Completeness to theta = 67.687    | 98.4 %                                                                                                                |
| Absorption correction             | Semi-empirical from equivalents                                                                                       |
| Max. and min. transmission        | 0.915 and 0.677                                                                                                       |
| Refinement method                 | Full-matrix least-squares on F <sup>2</sup>                                                                           |
| Data / restraints / parameters    | 11424 / 1 / 712                                                                                                       |
| Goodness-of-fit on F <sup>2</sup> | 1.083                                                                                                                 |
| Final R indices [I>2sigma(I)]     | R1 = 0.0357, wR2 = 0.1020                                                                                             |
| R indices (all data)              | R1 = 0.0375, wR2 = 0.1029                                                                                             |
| Absolute structure parameter      | 0.10(6)                                                                                                               |
| Extinction coefficient            | 0.0016(3)                                                                                                             |
| Largest diff. peak and hole       | 0.218 and -0.163 e.Å <sup>-3</sup>                                                                                    |

## 5. NMR Spectra ( $^1\text{H}$ NMR, $^{13}\text{C}$ NMR)

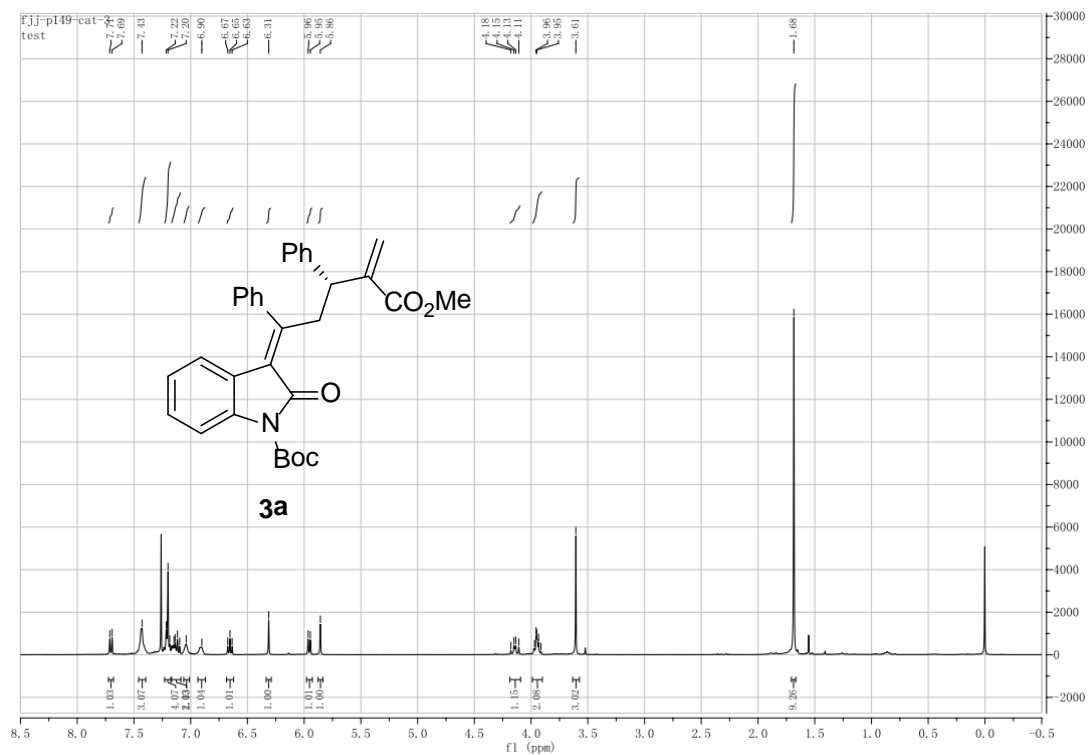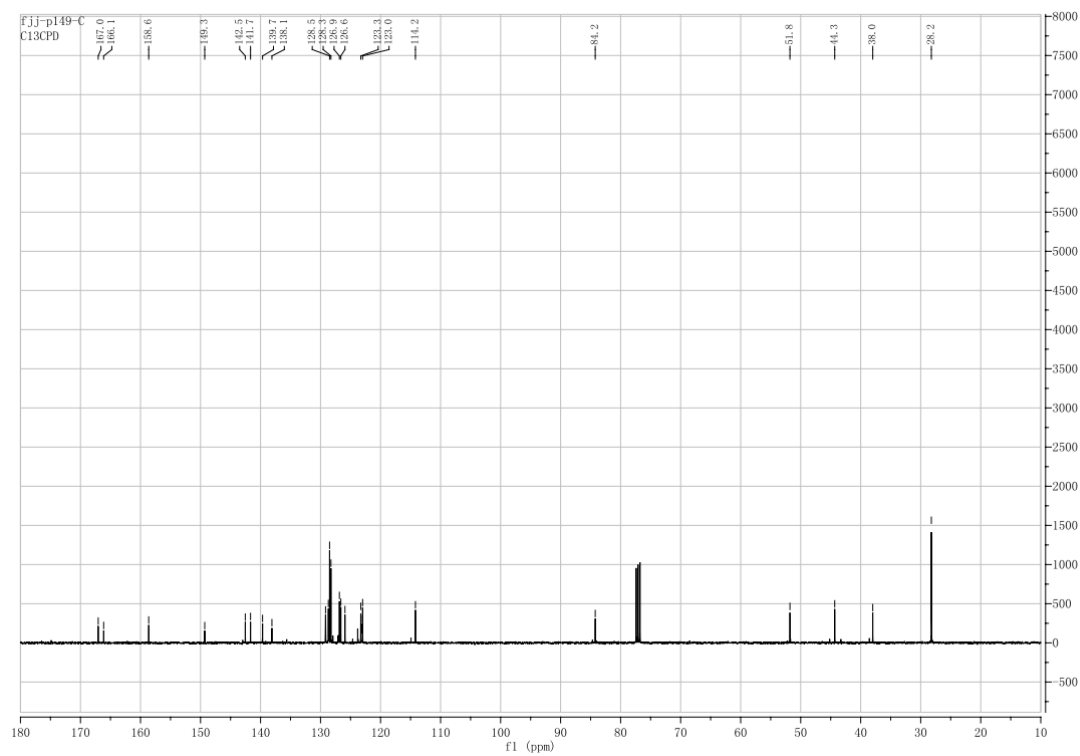

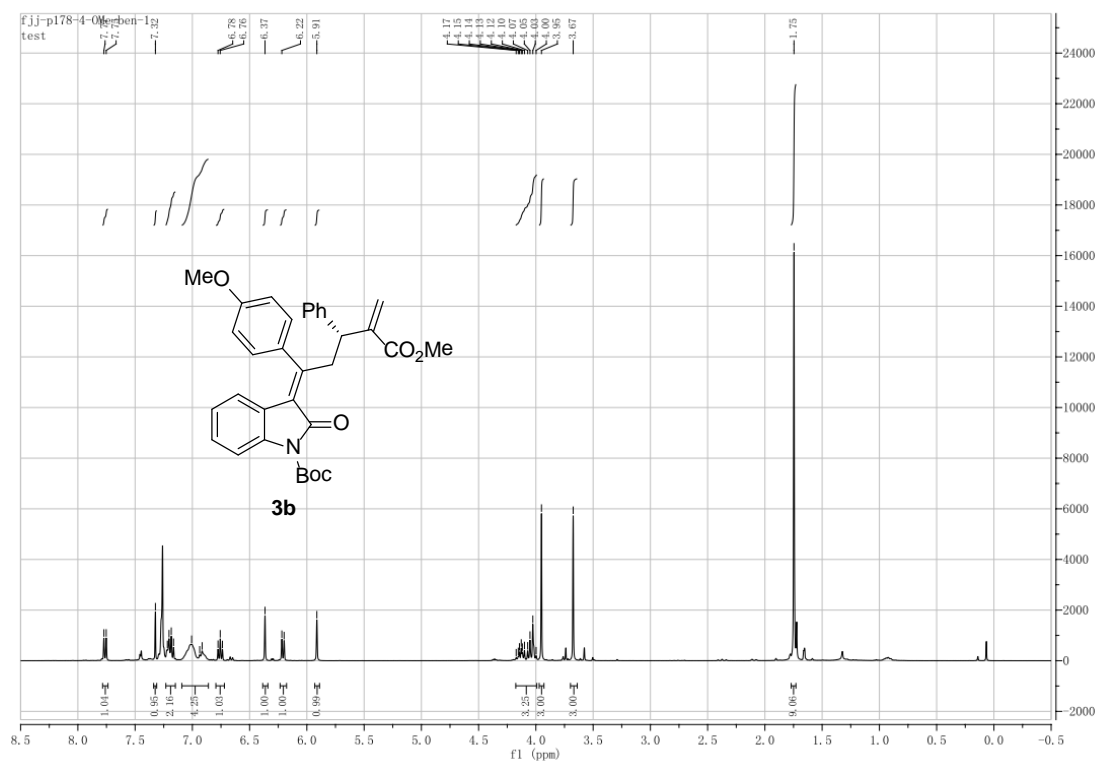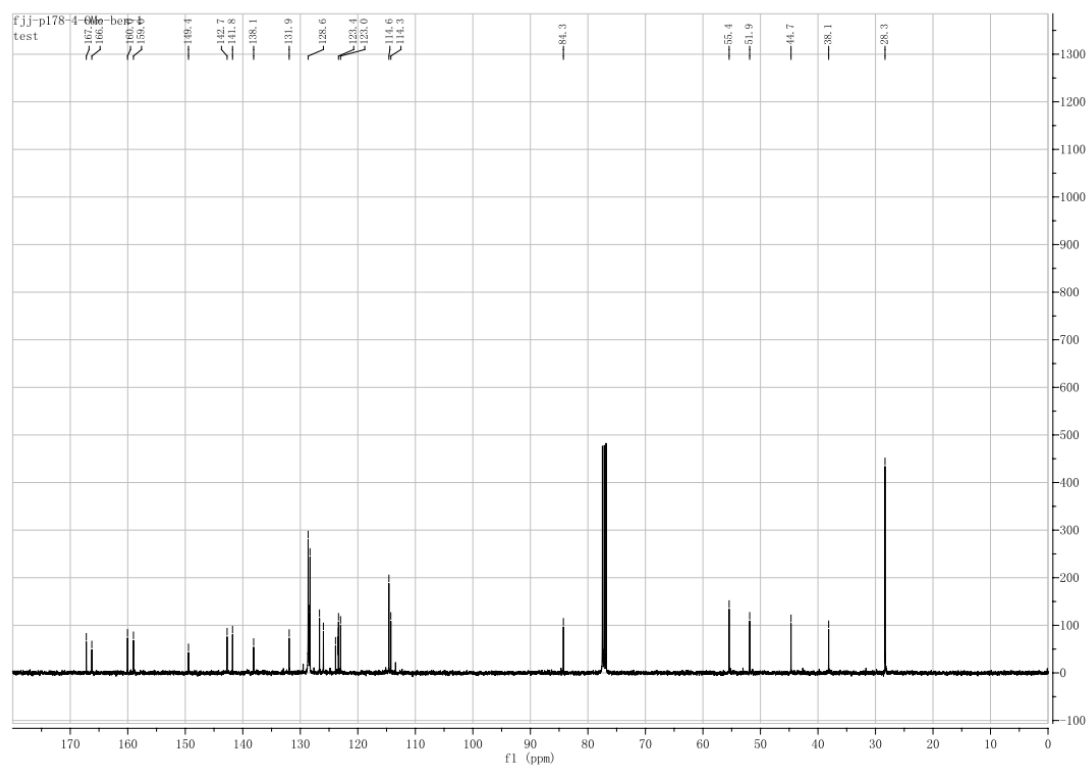

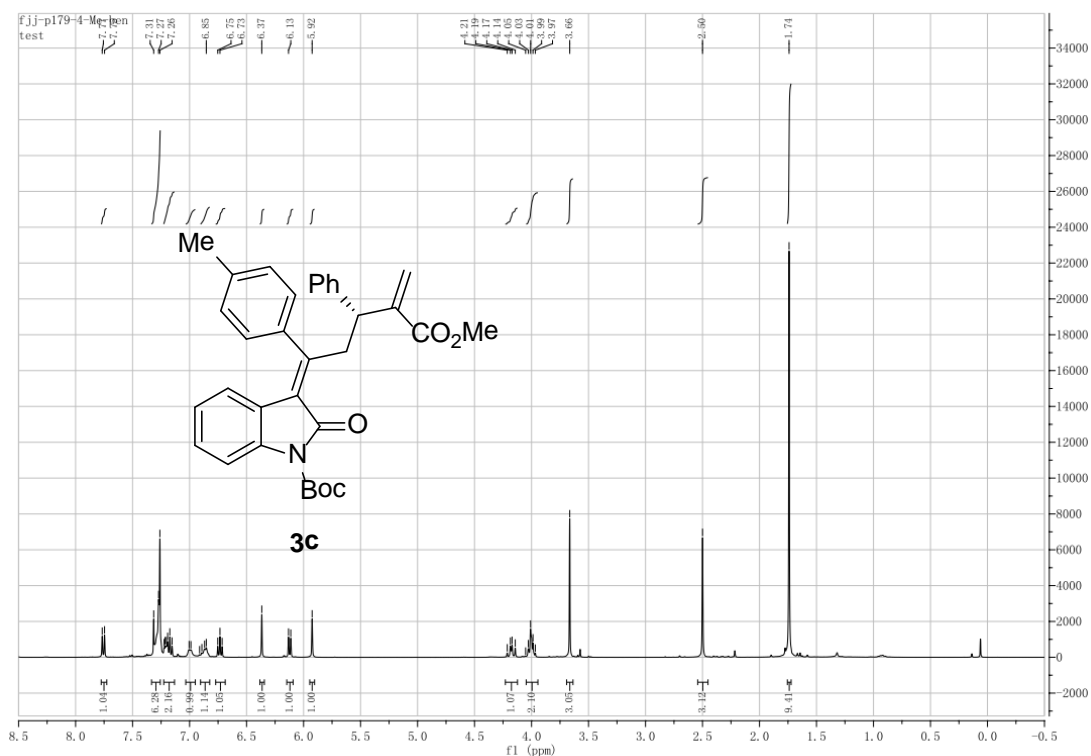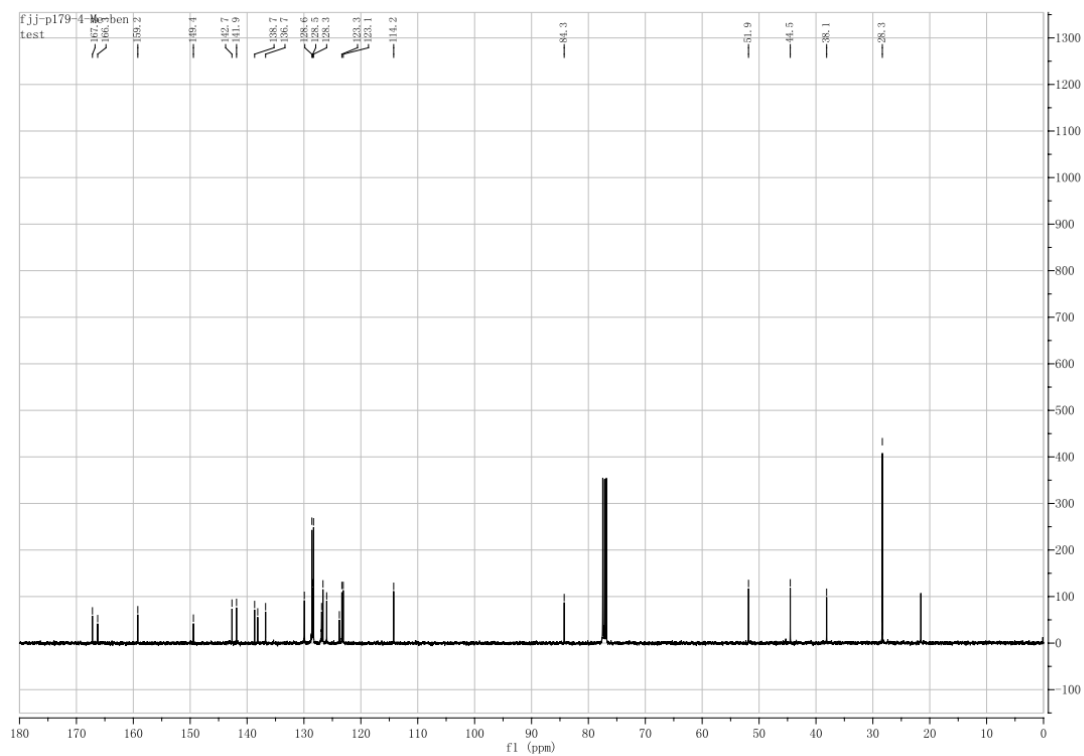

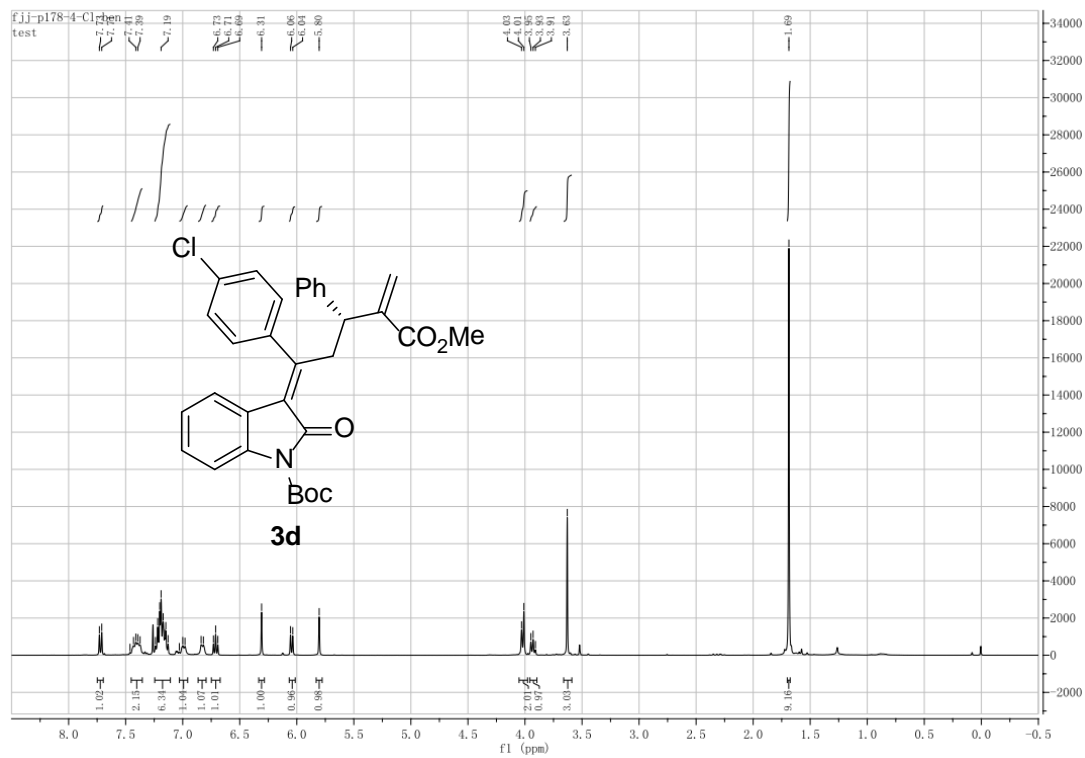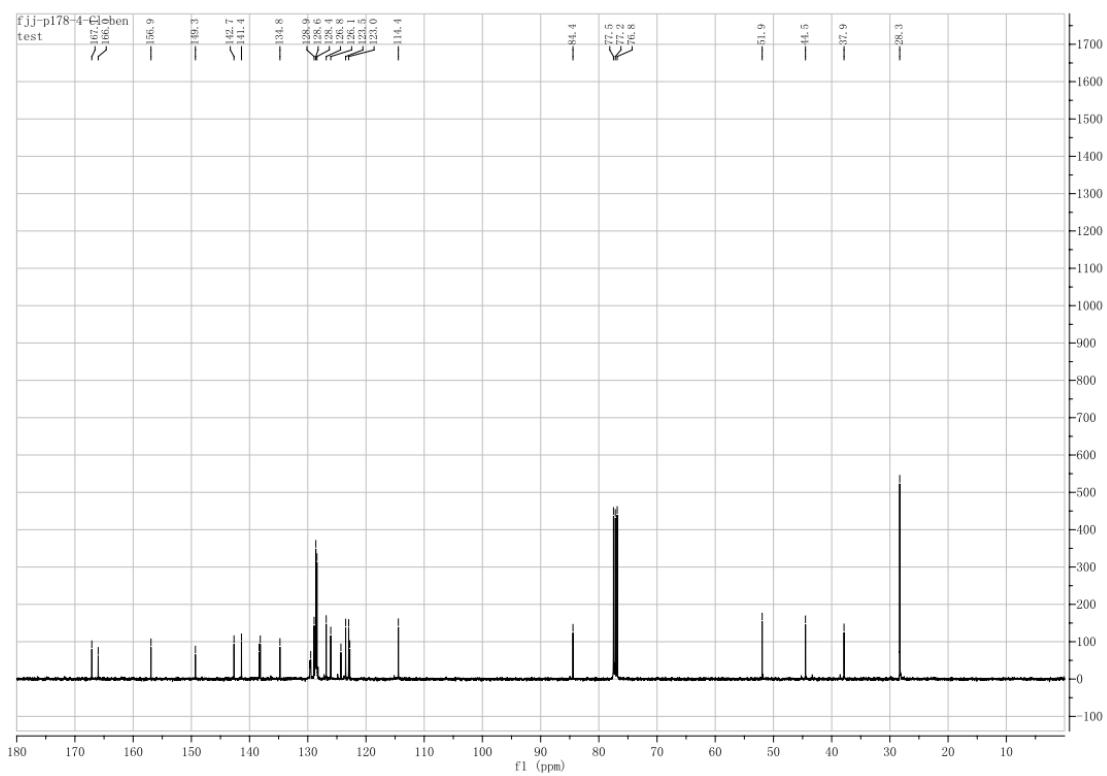

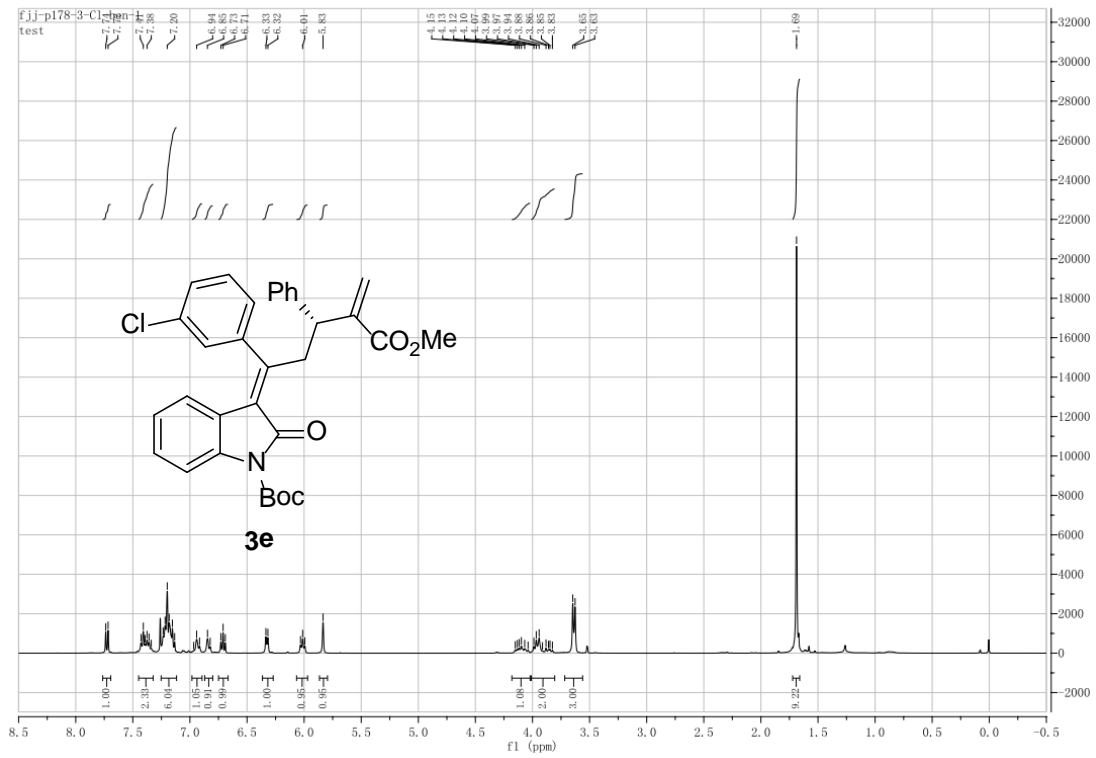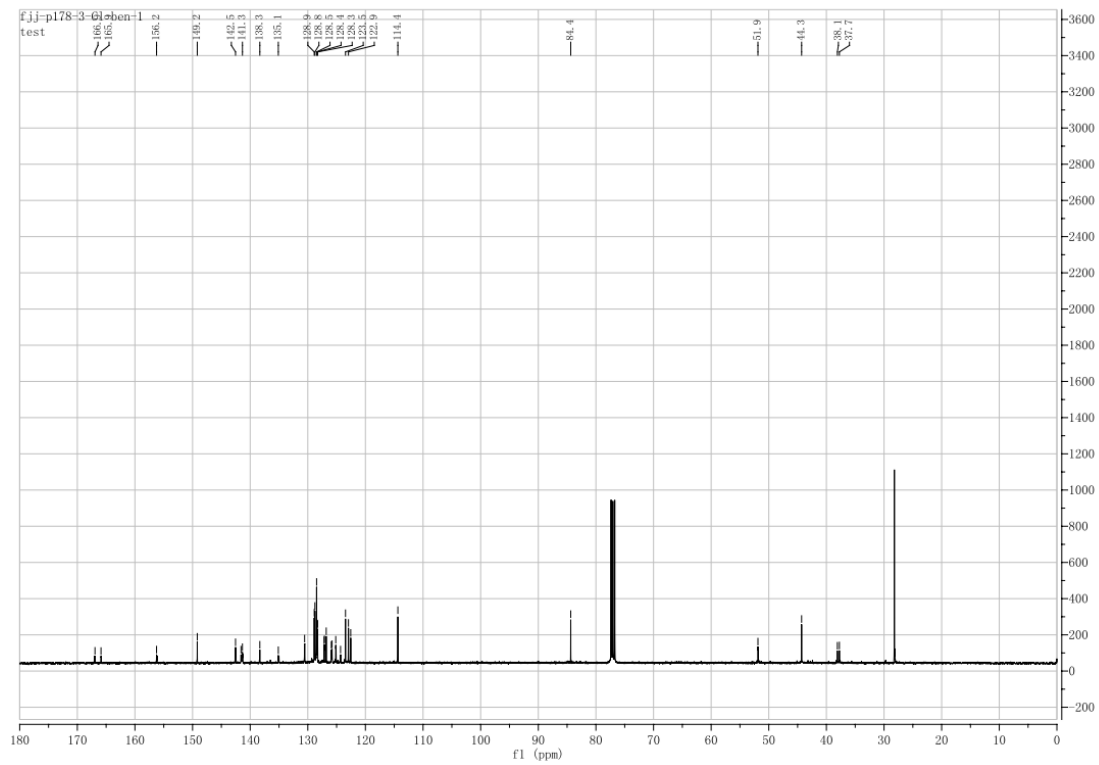



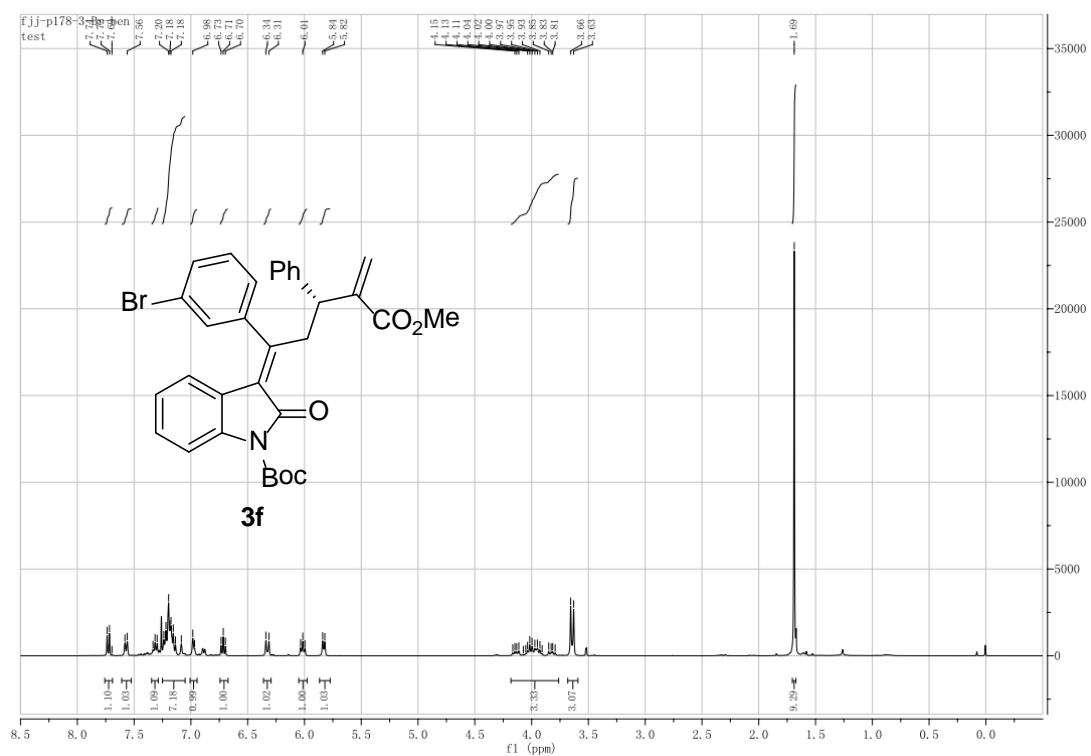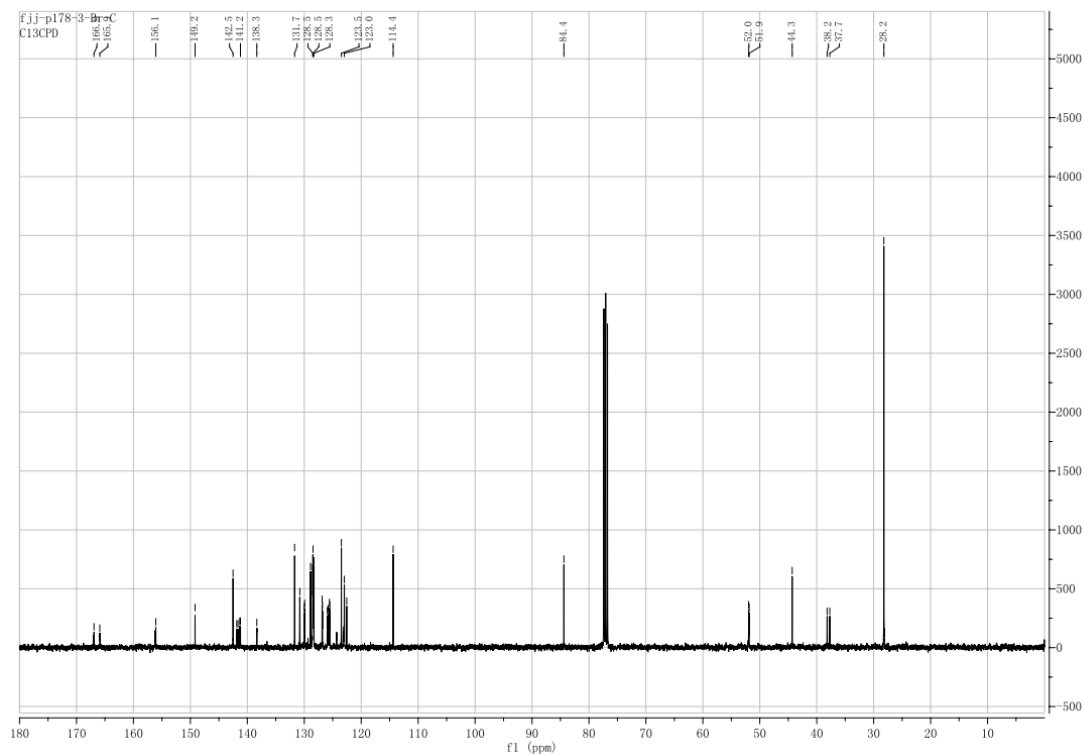

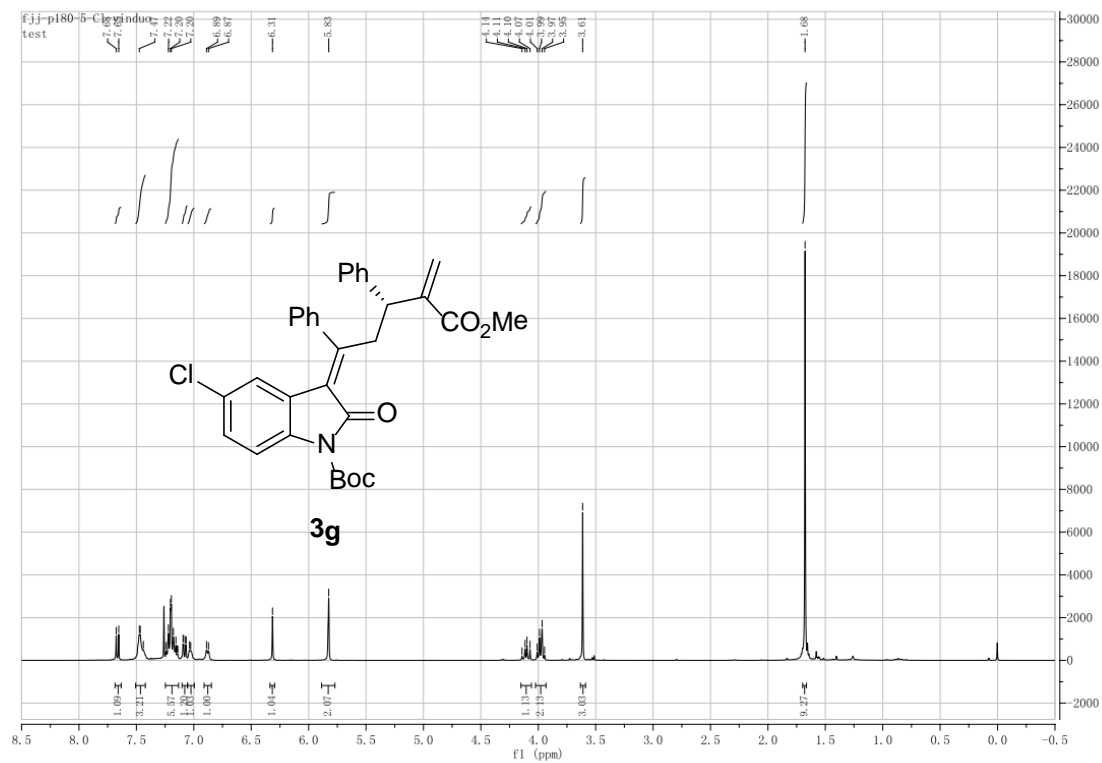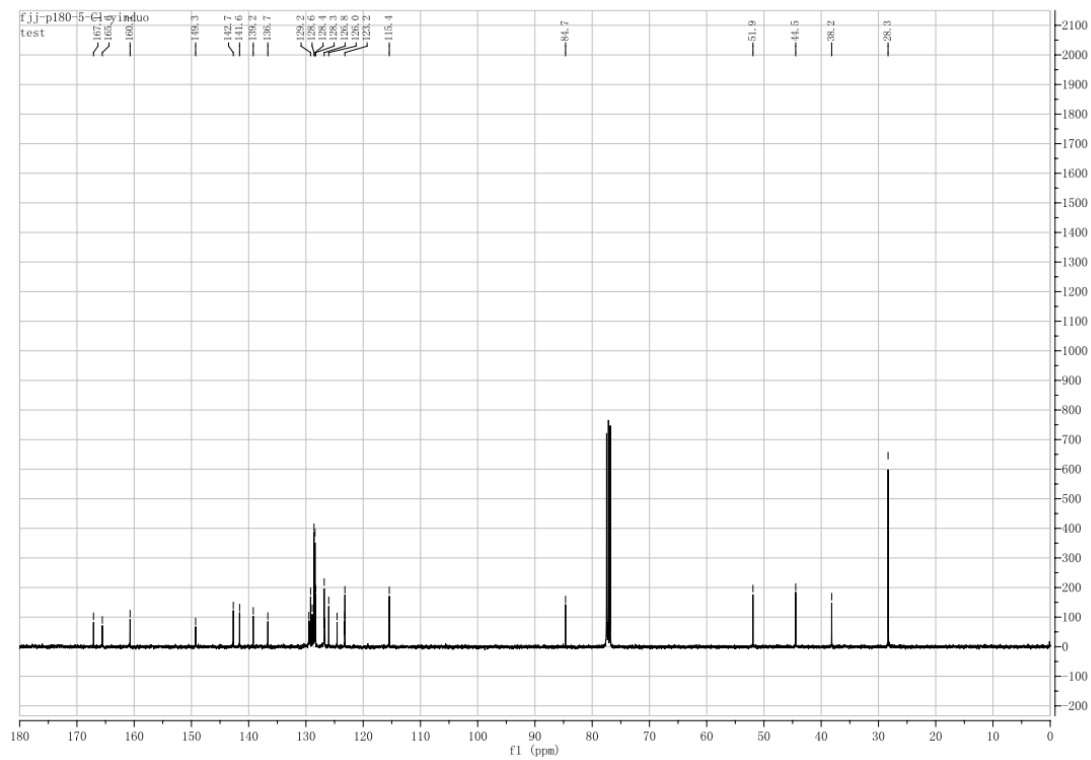

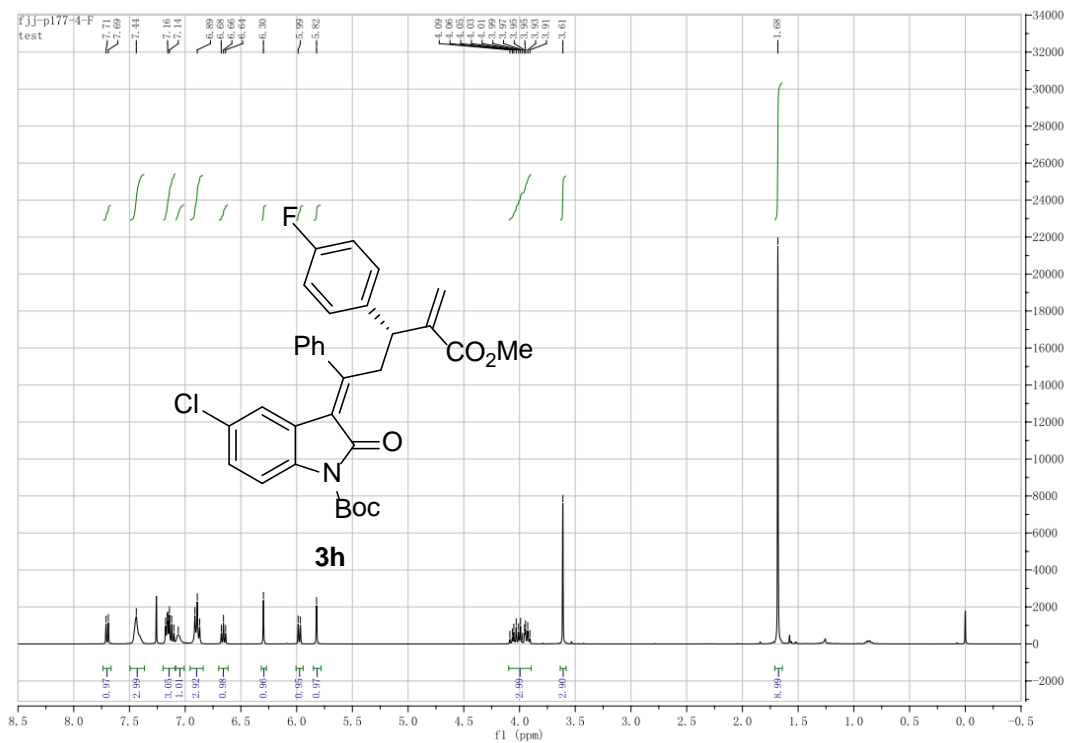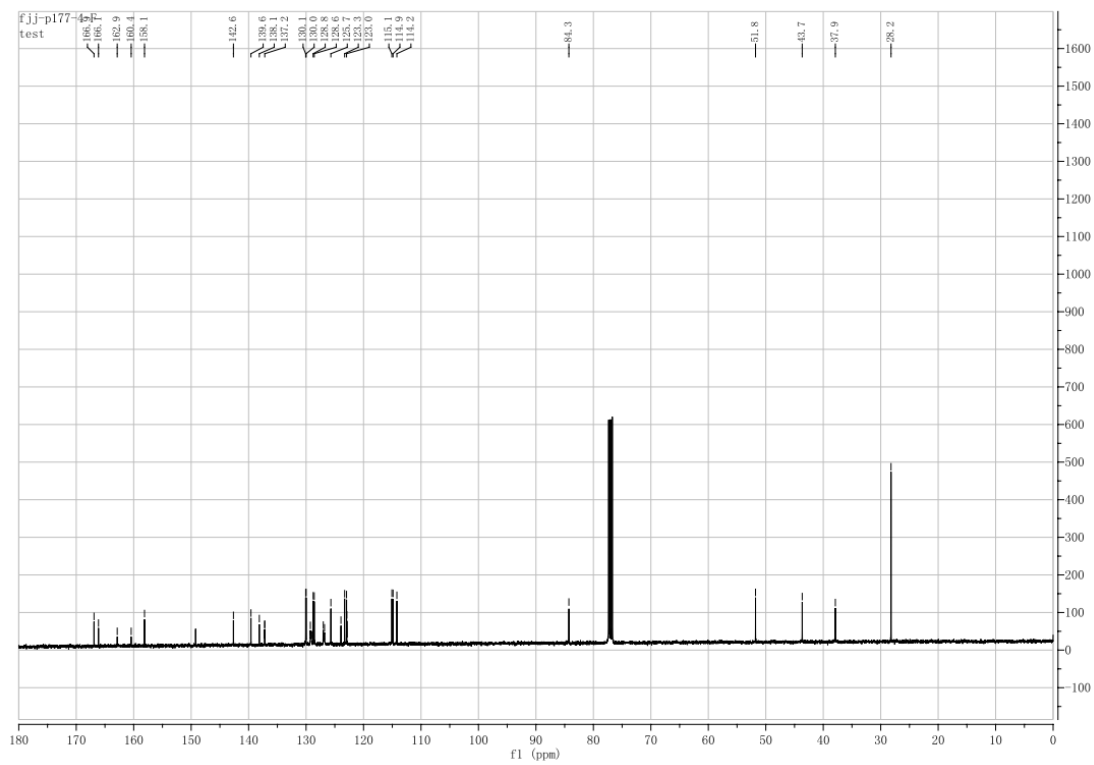

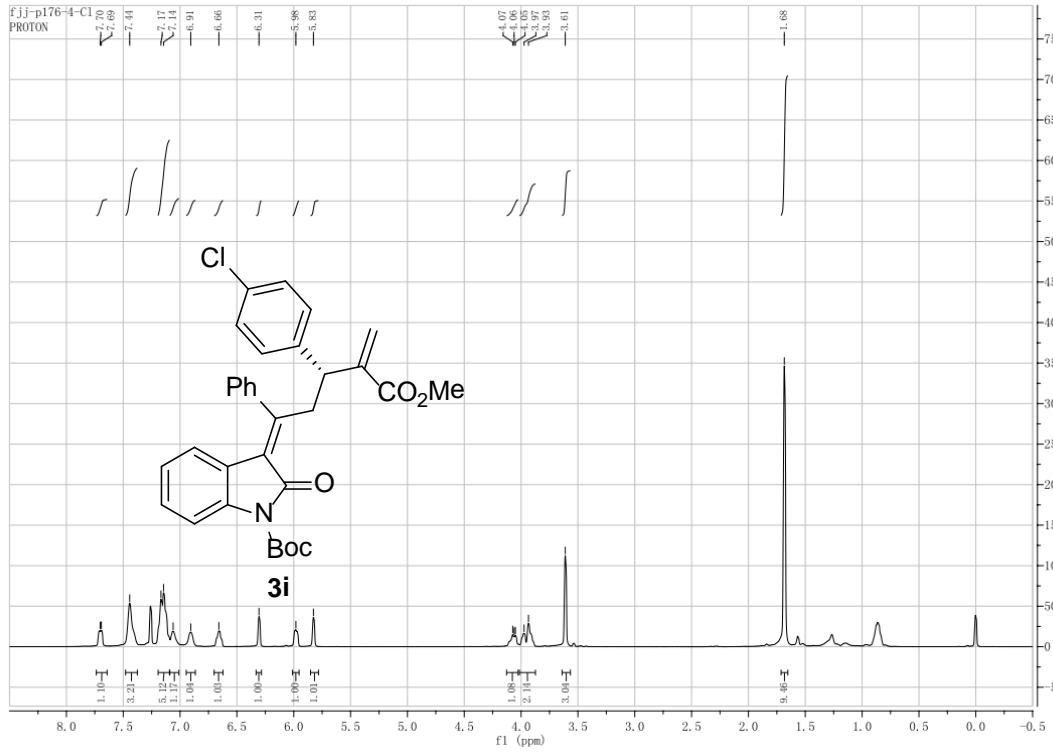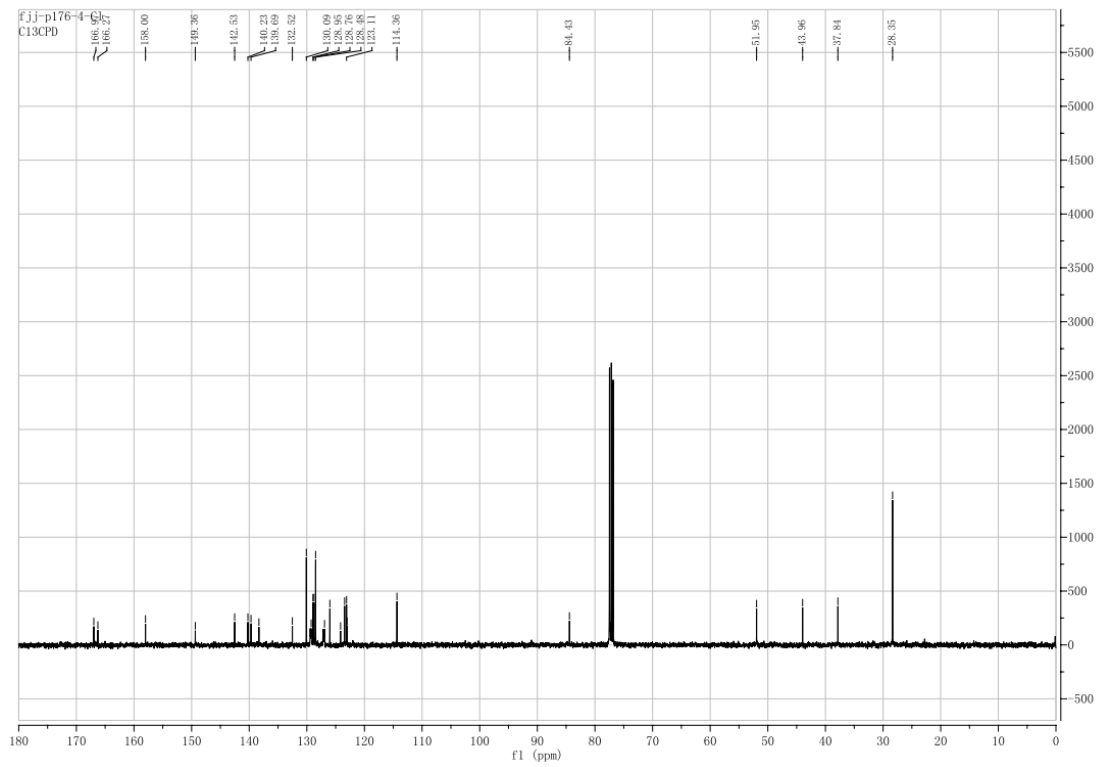

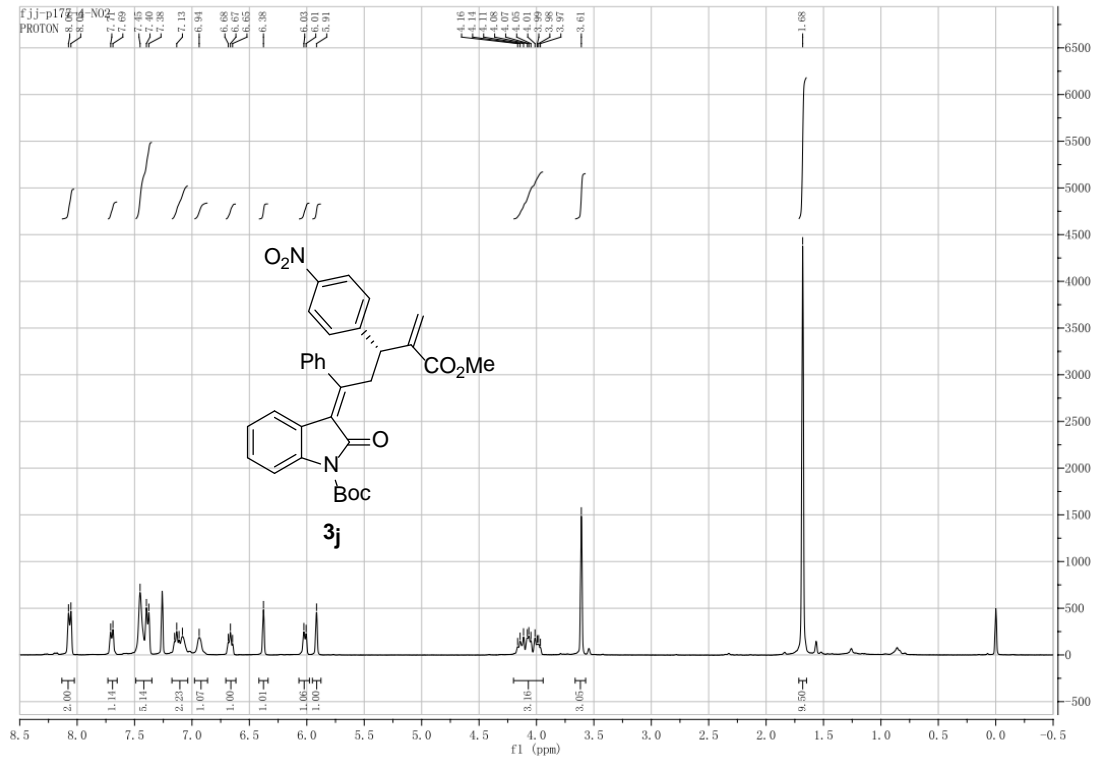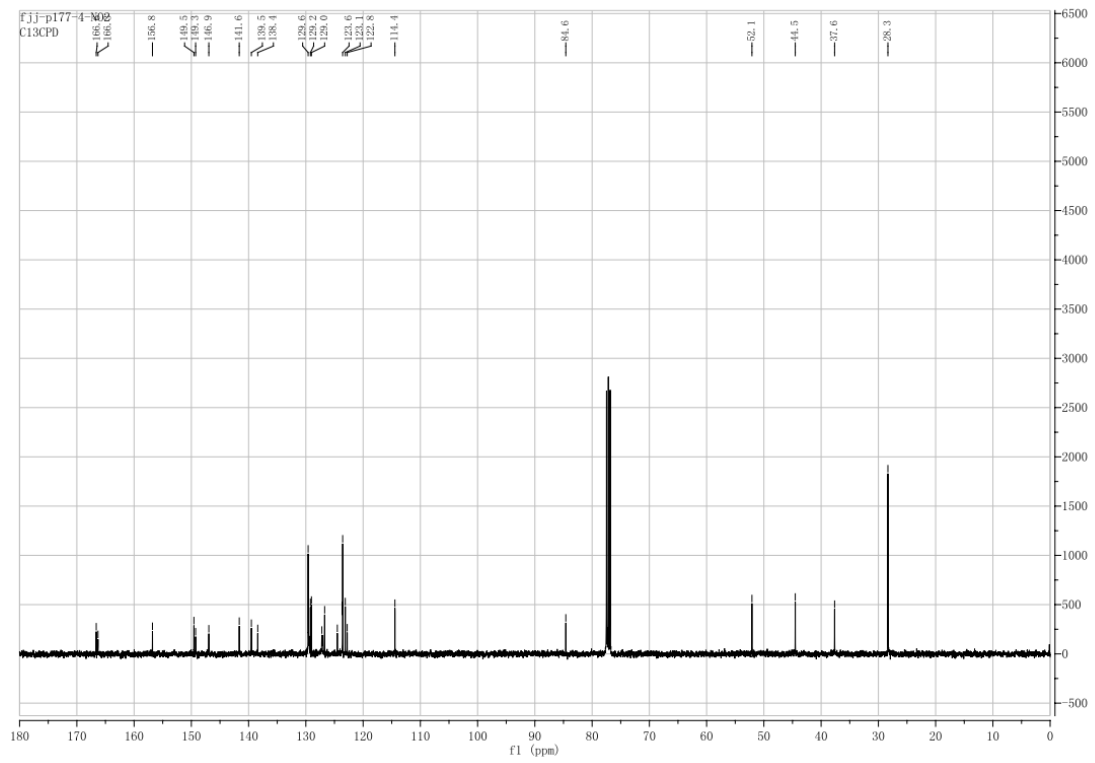

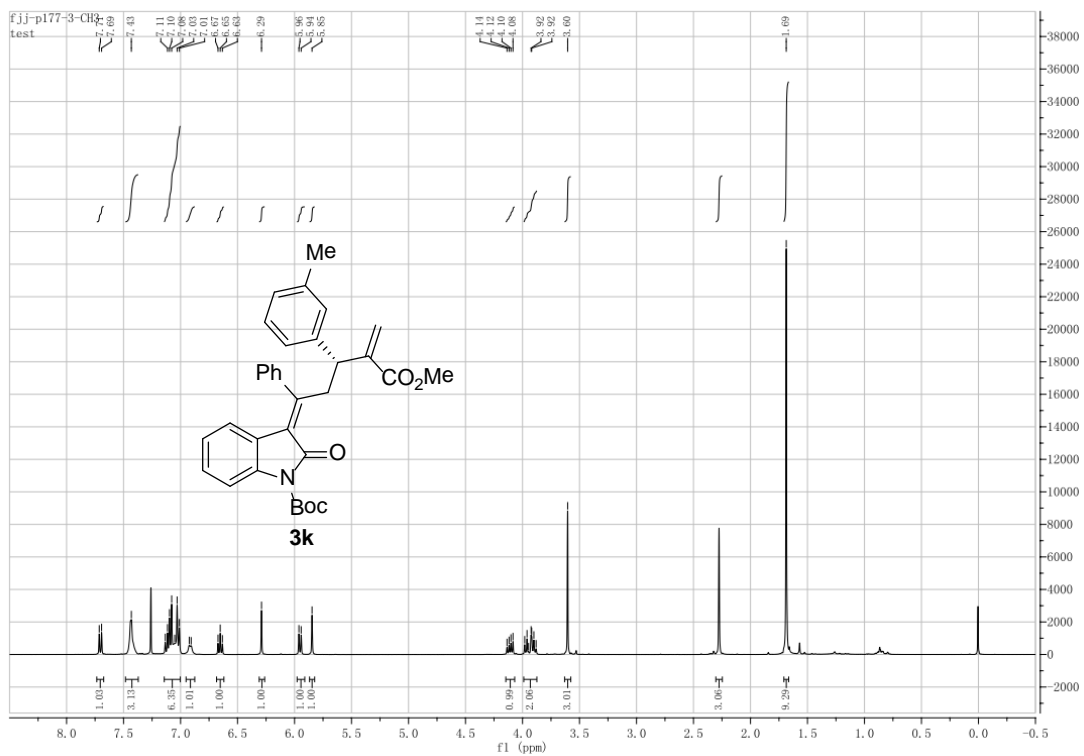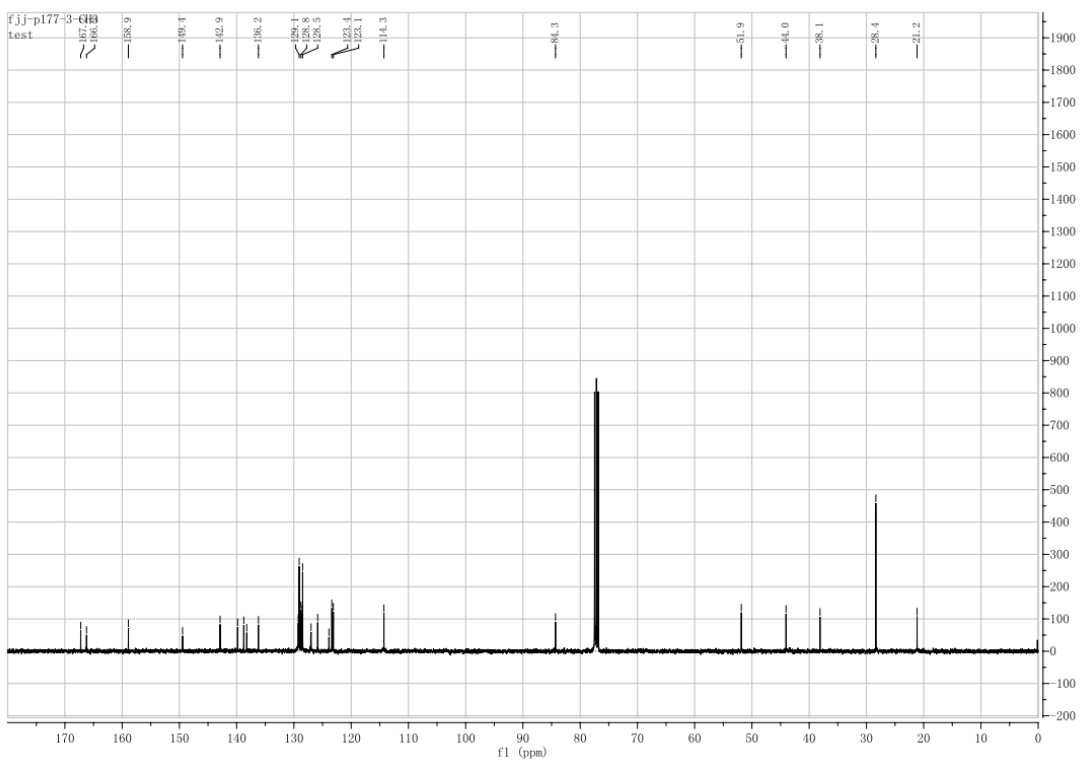

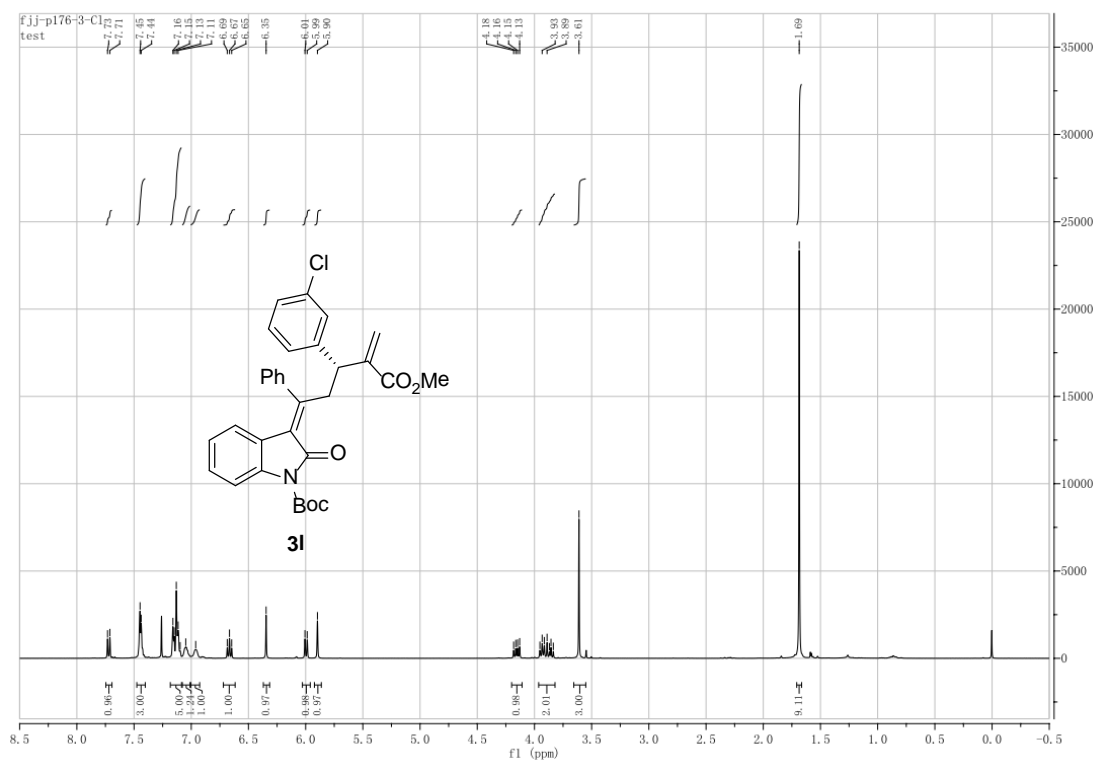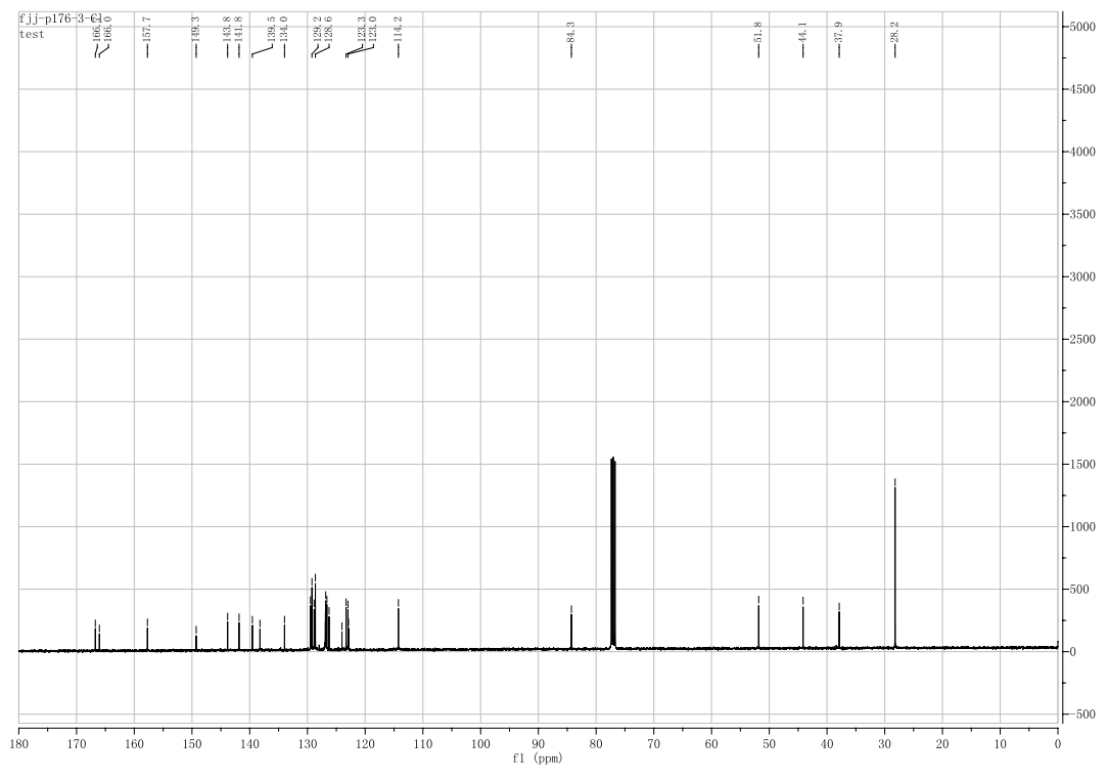

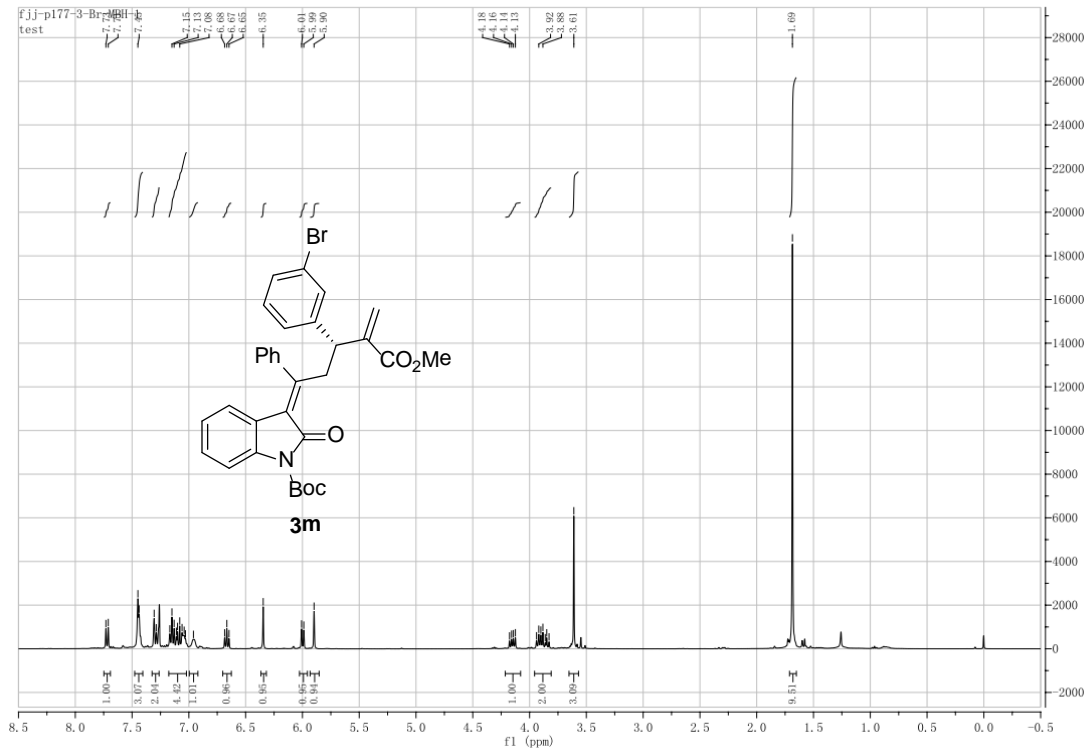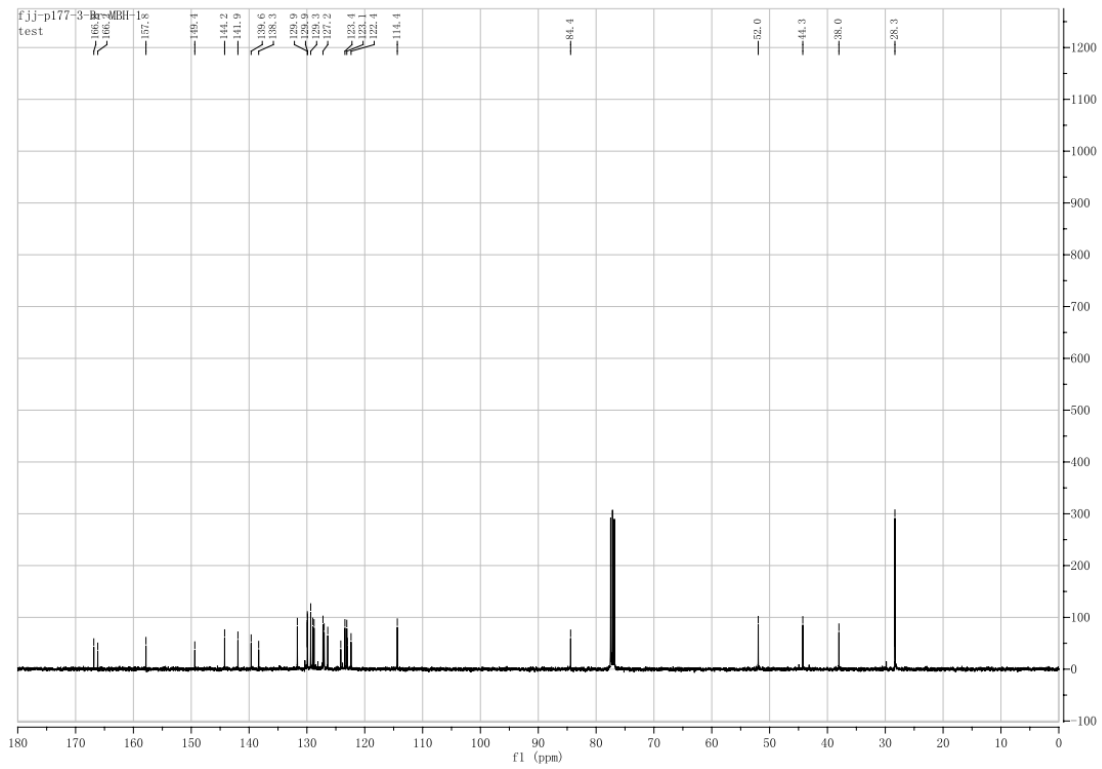



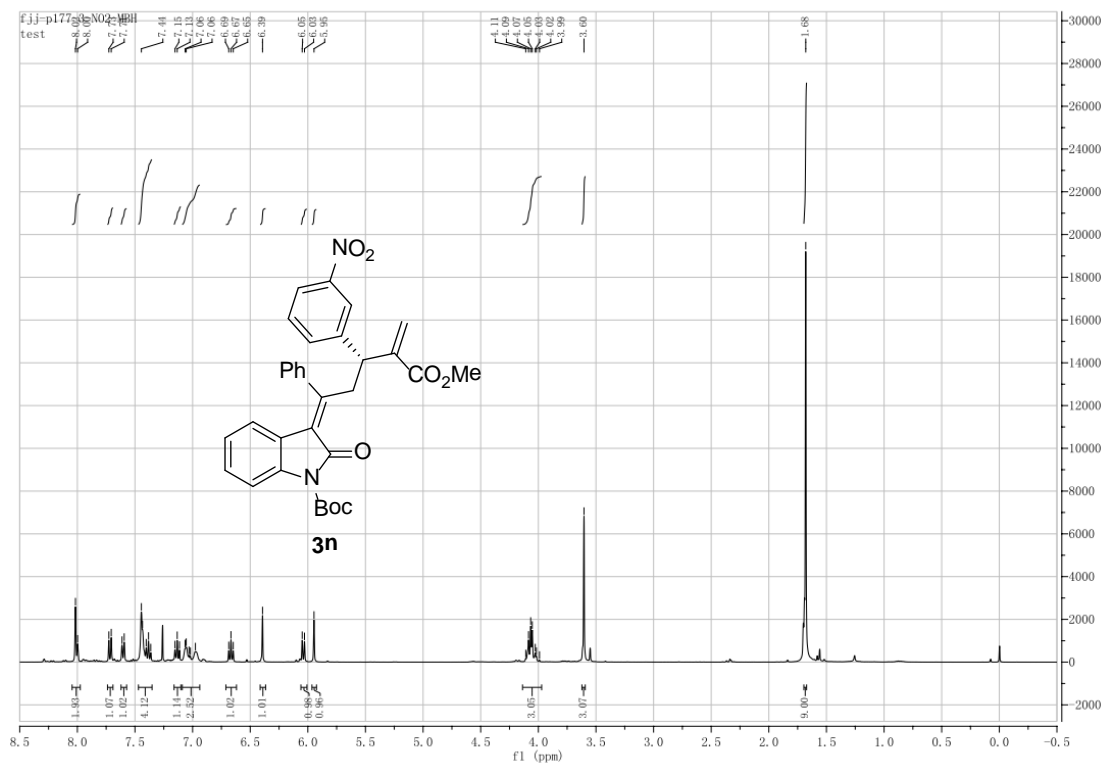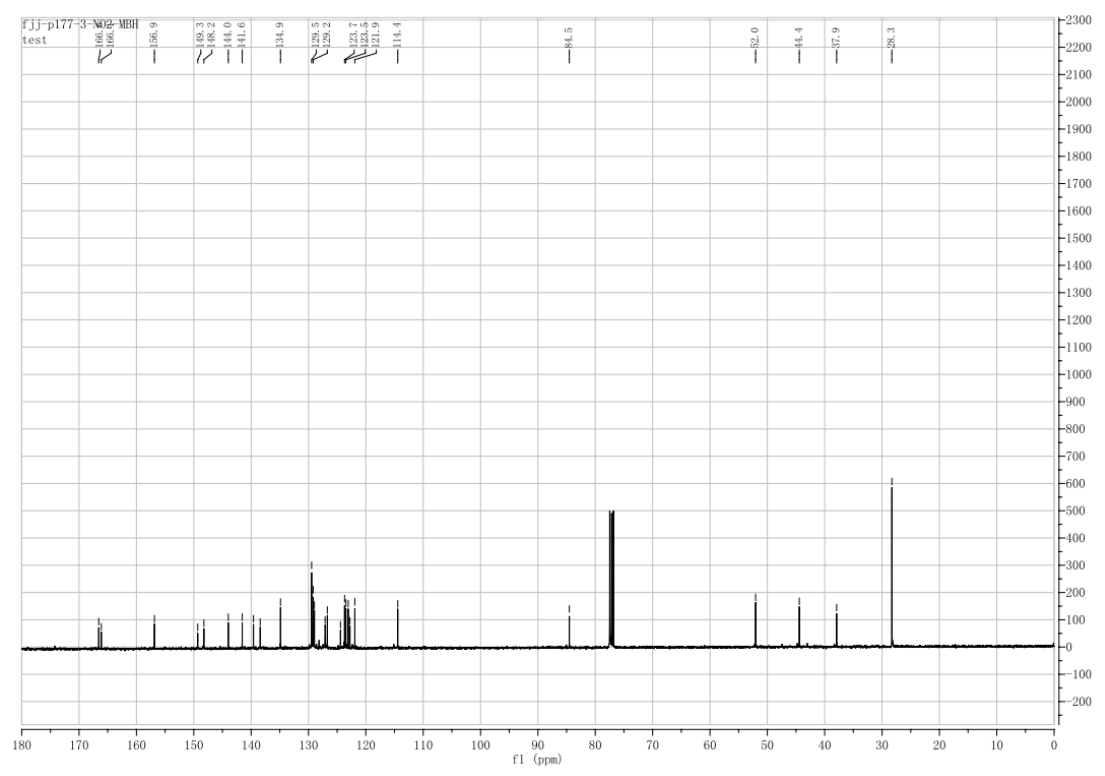

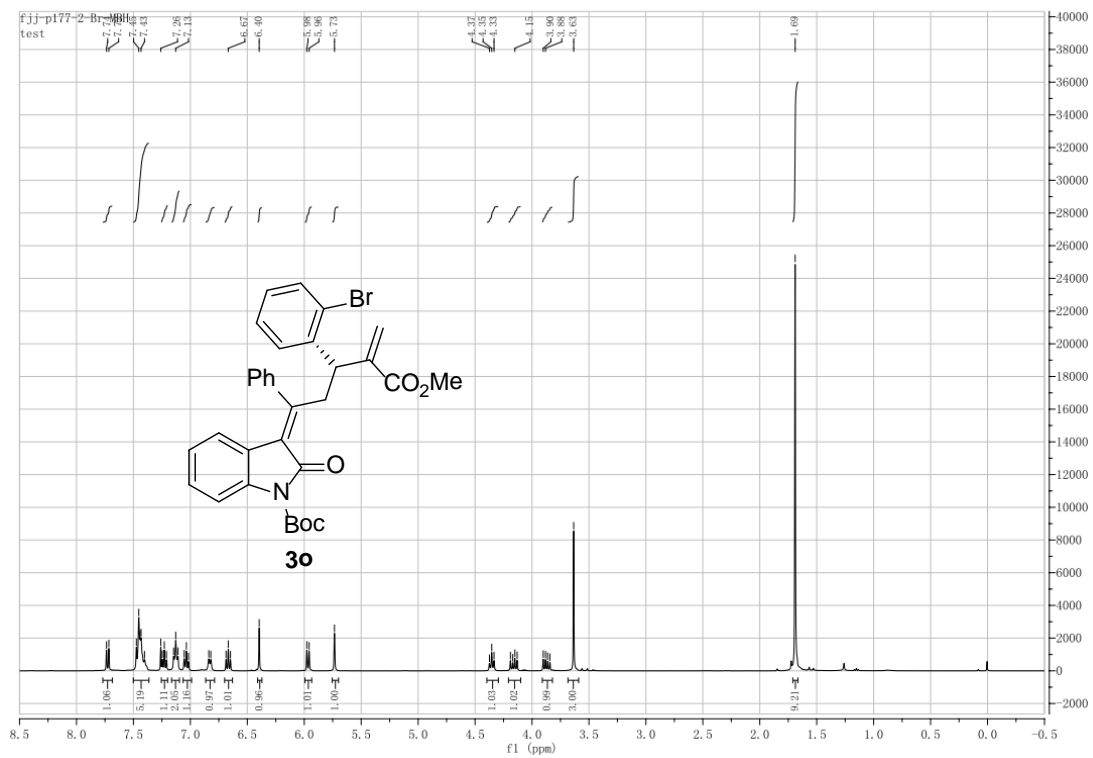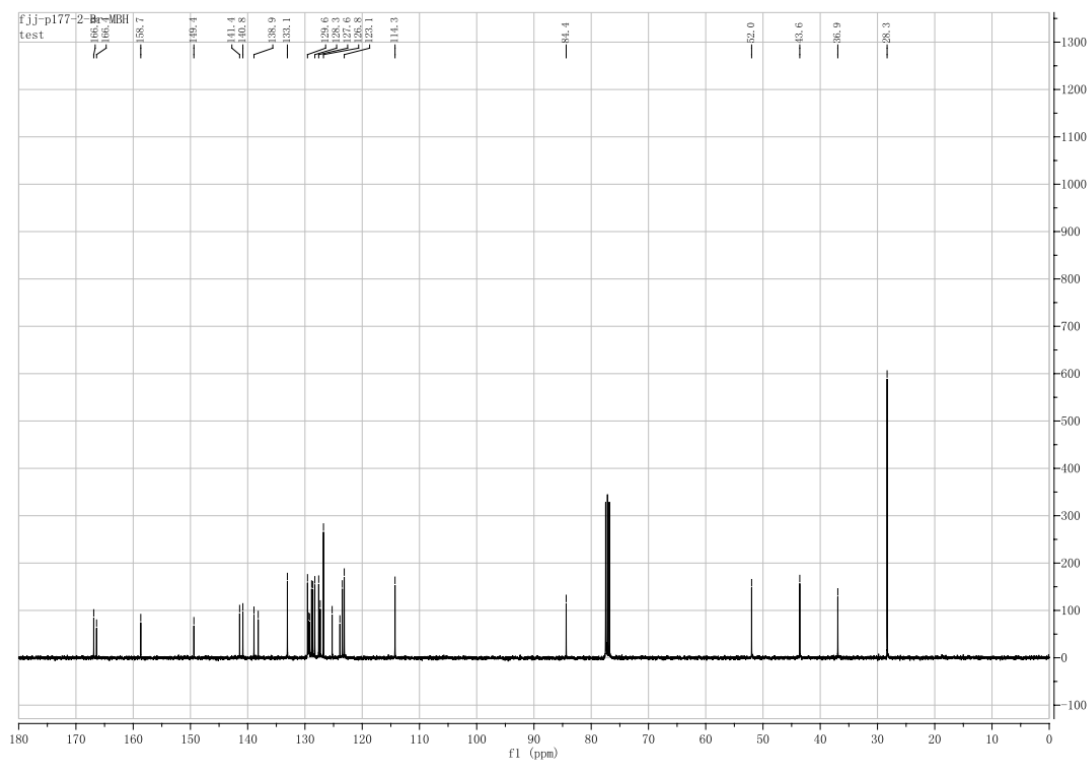

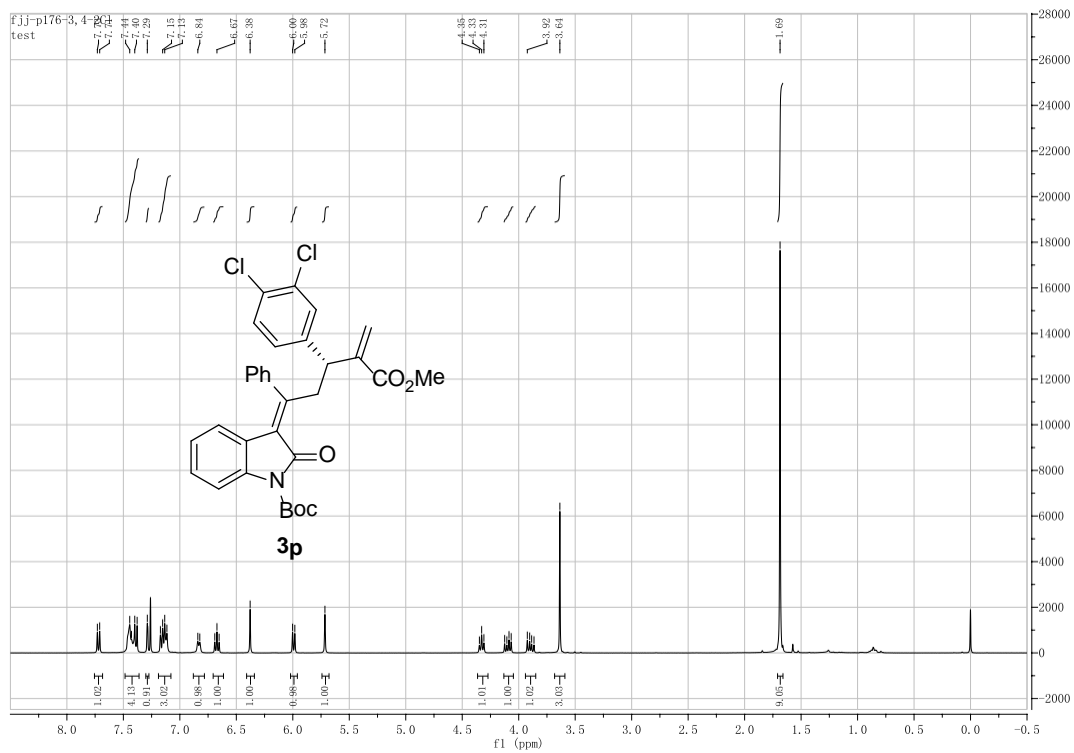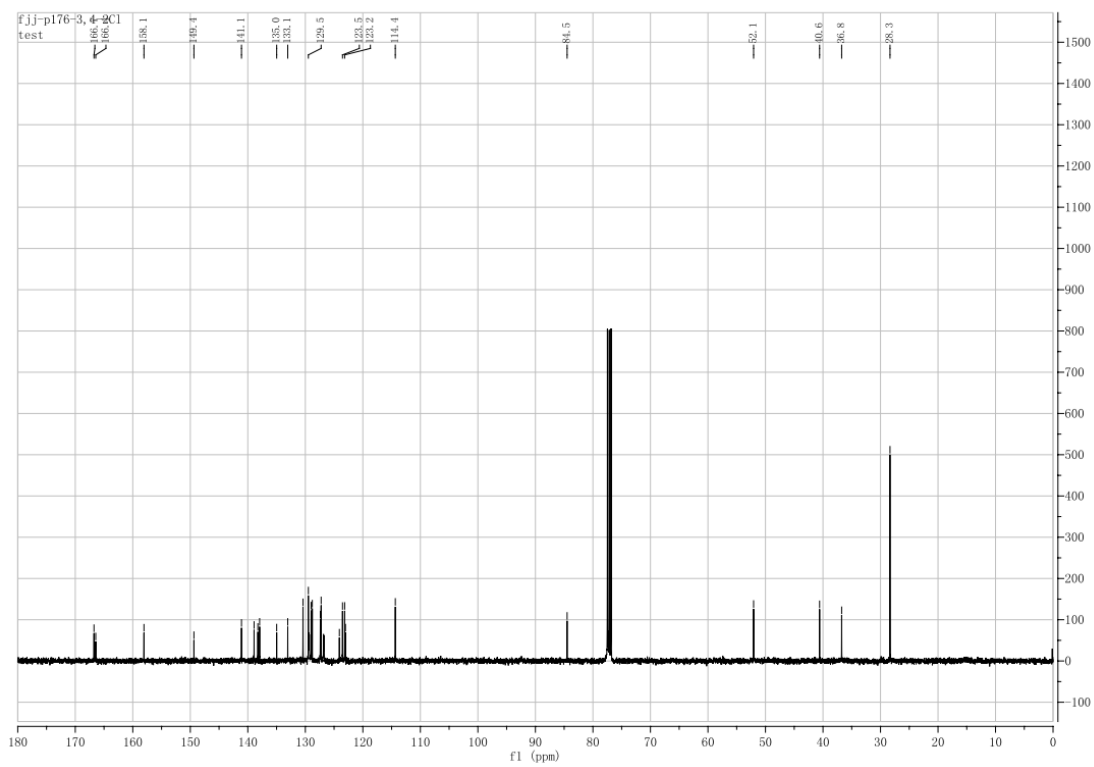

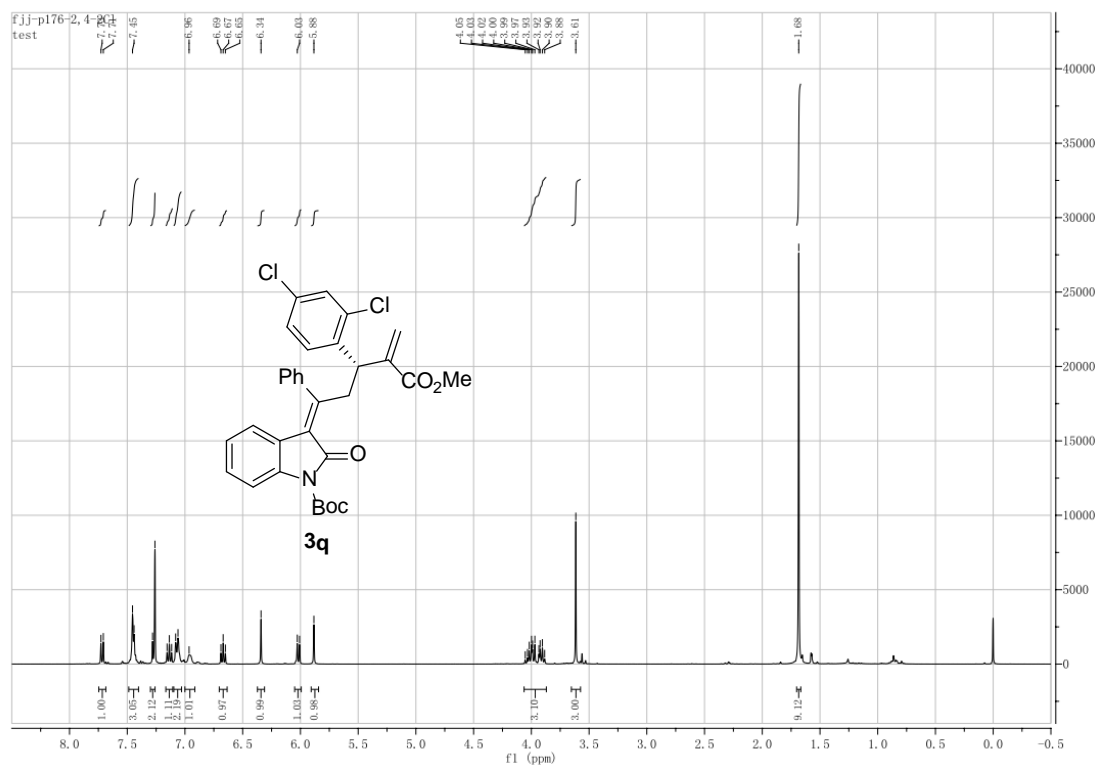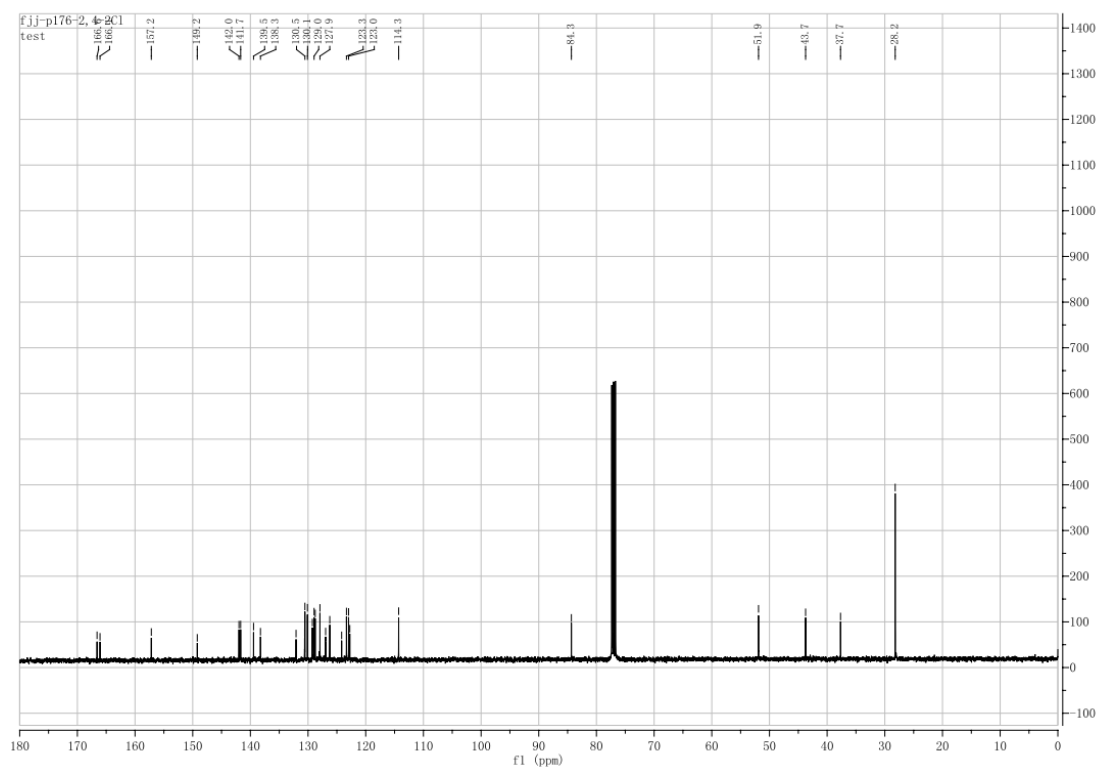

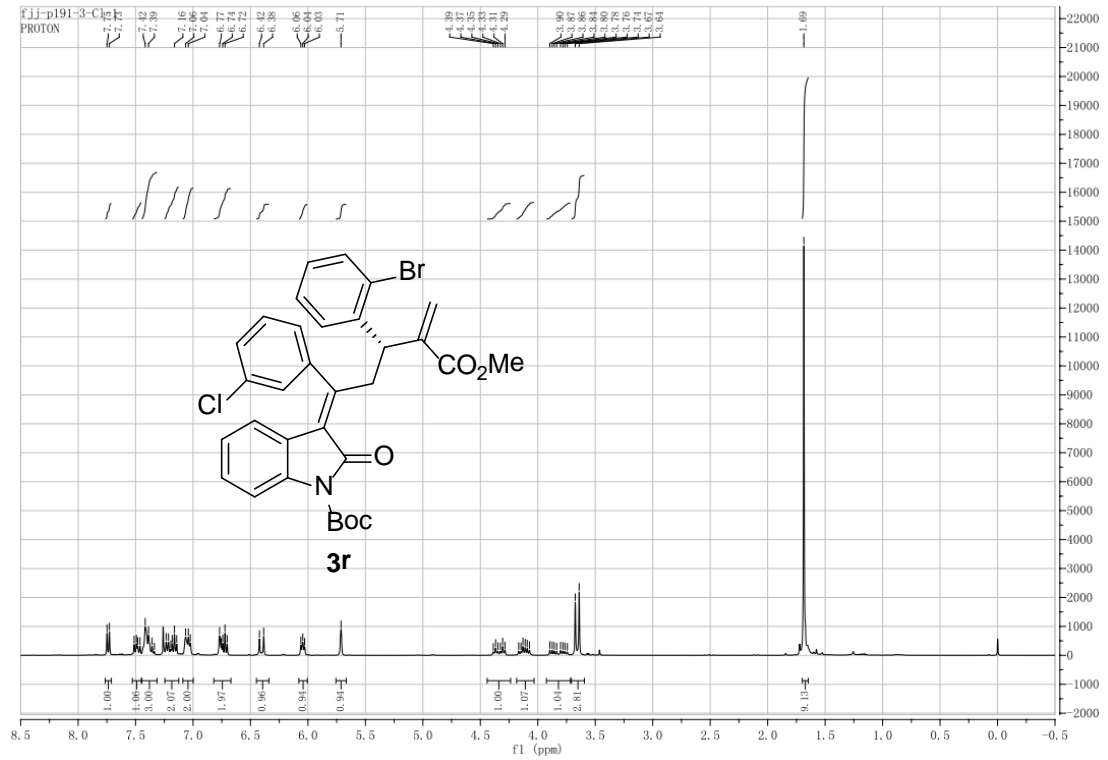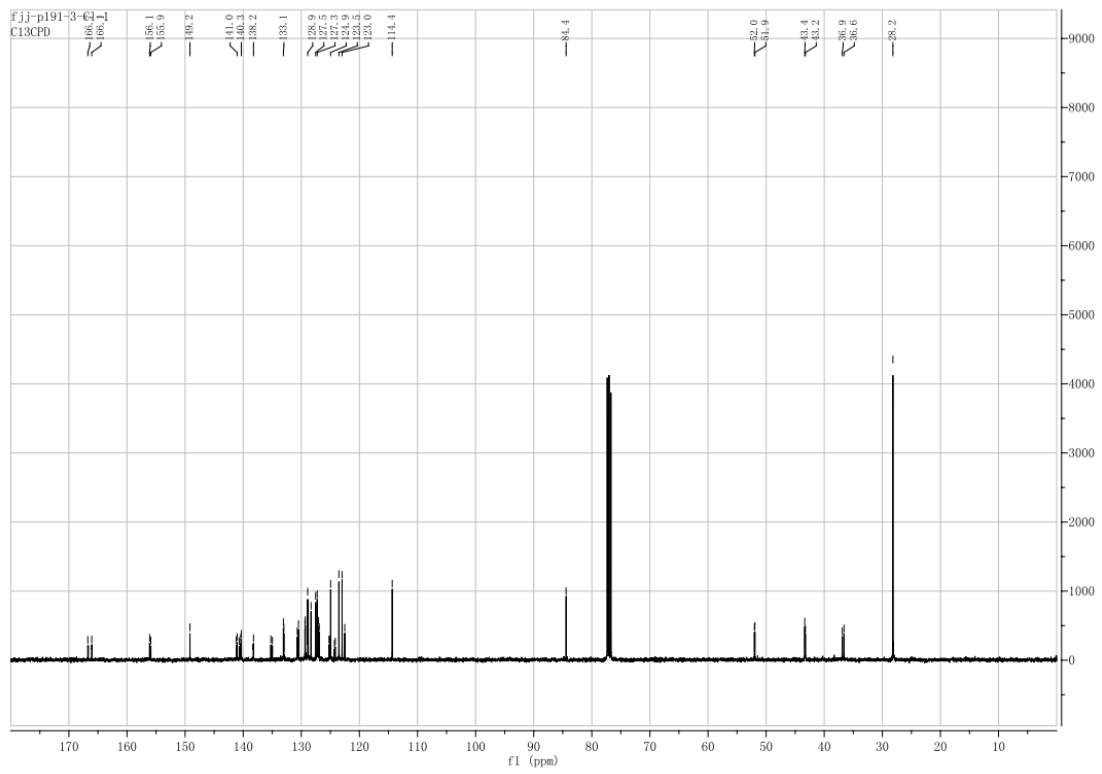

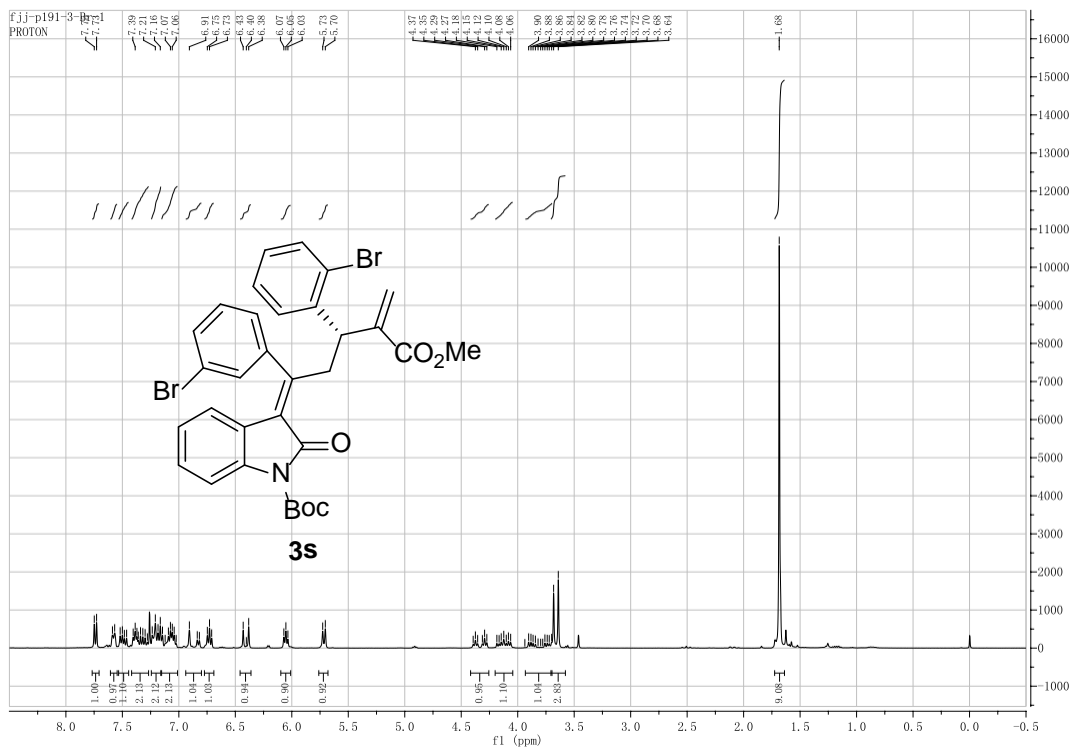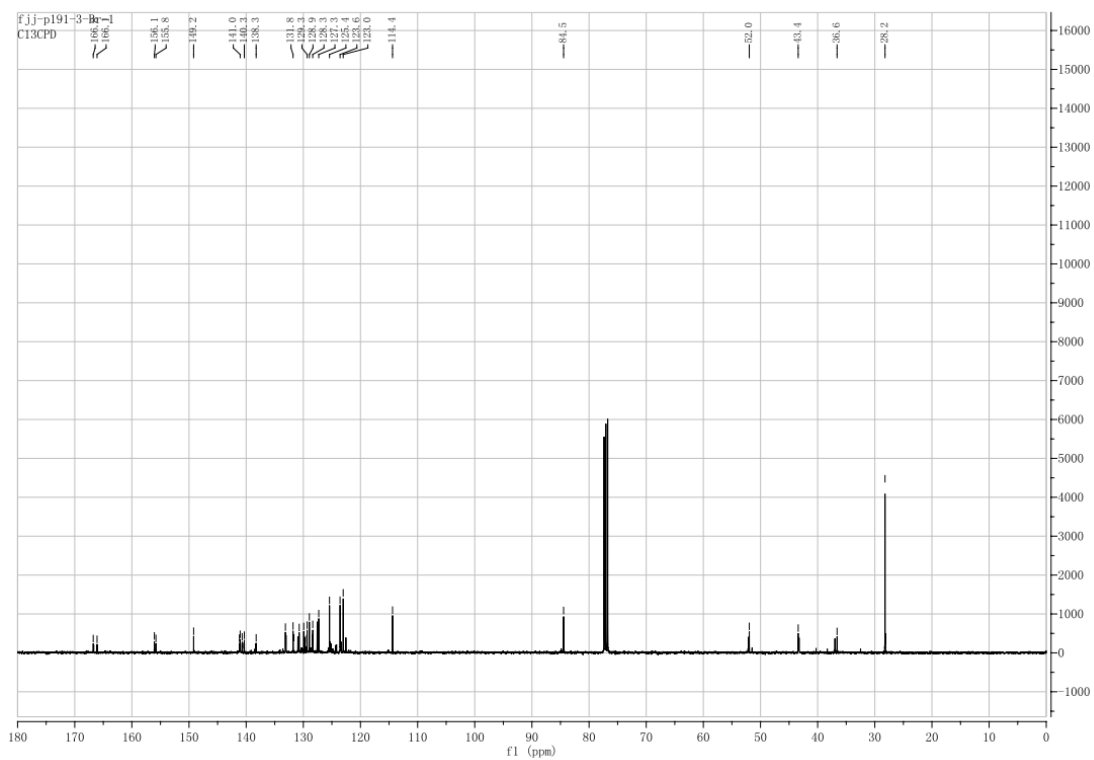

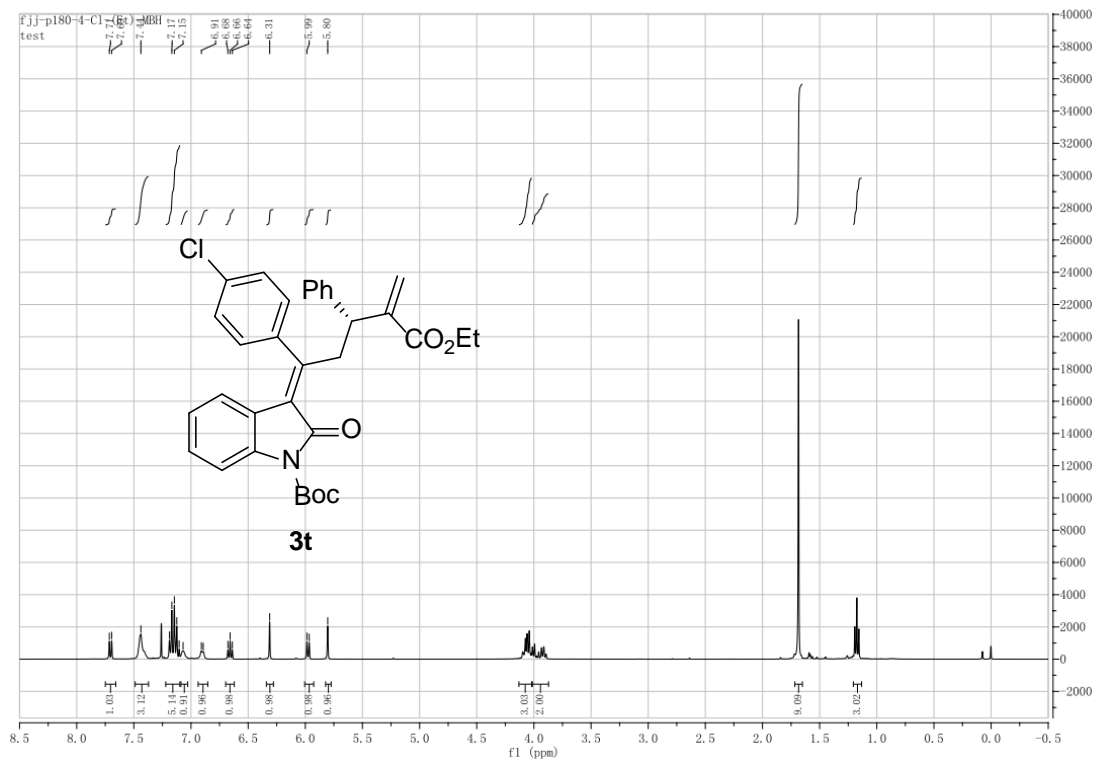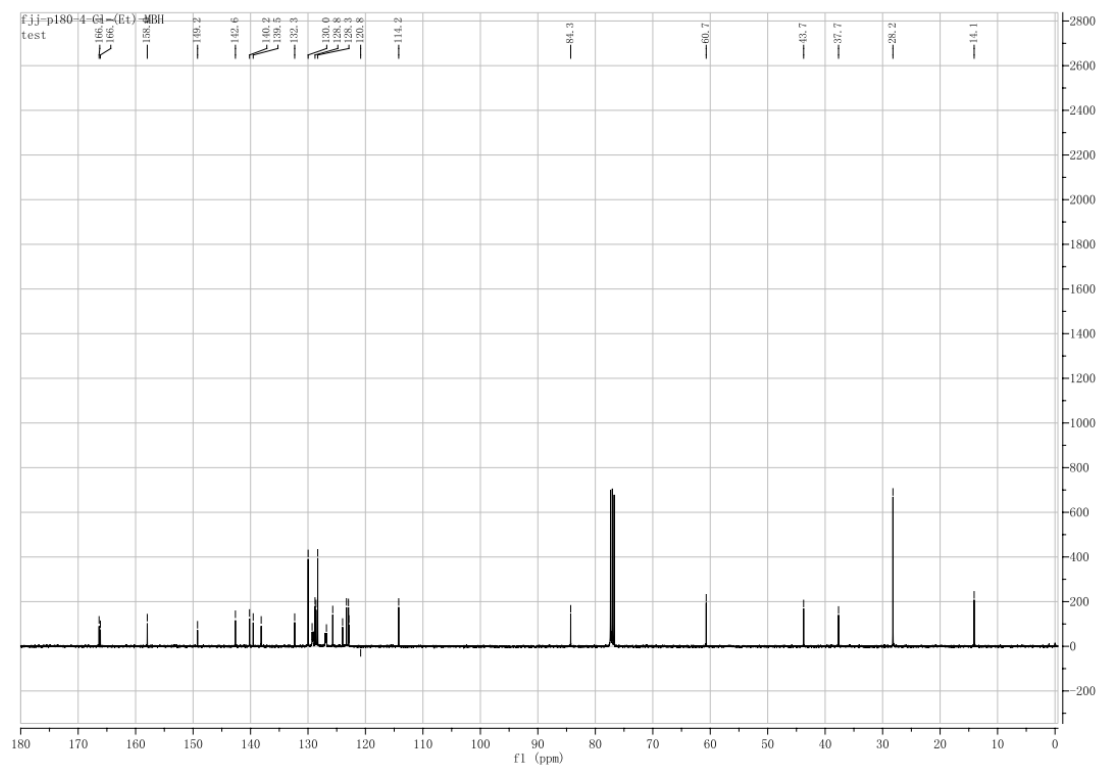

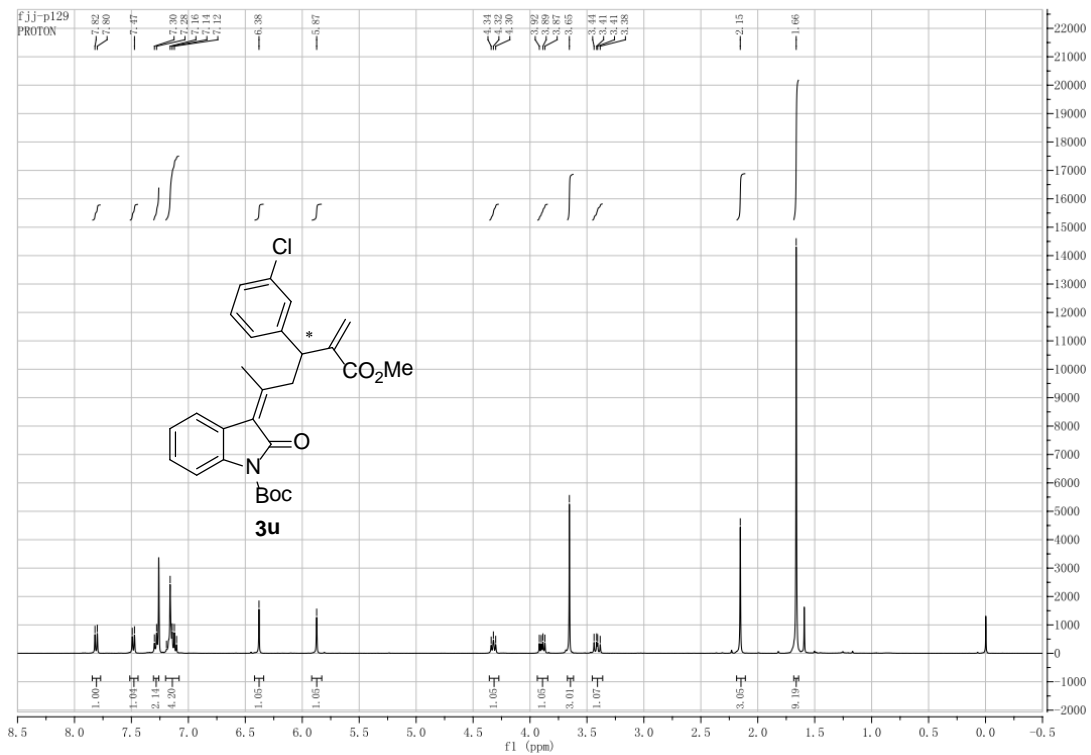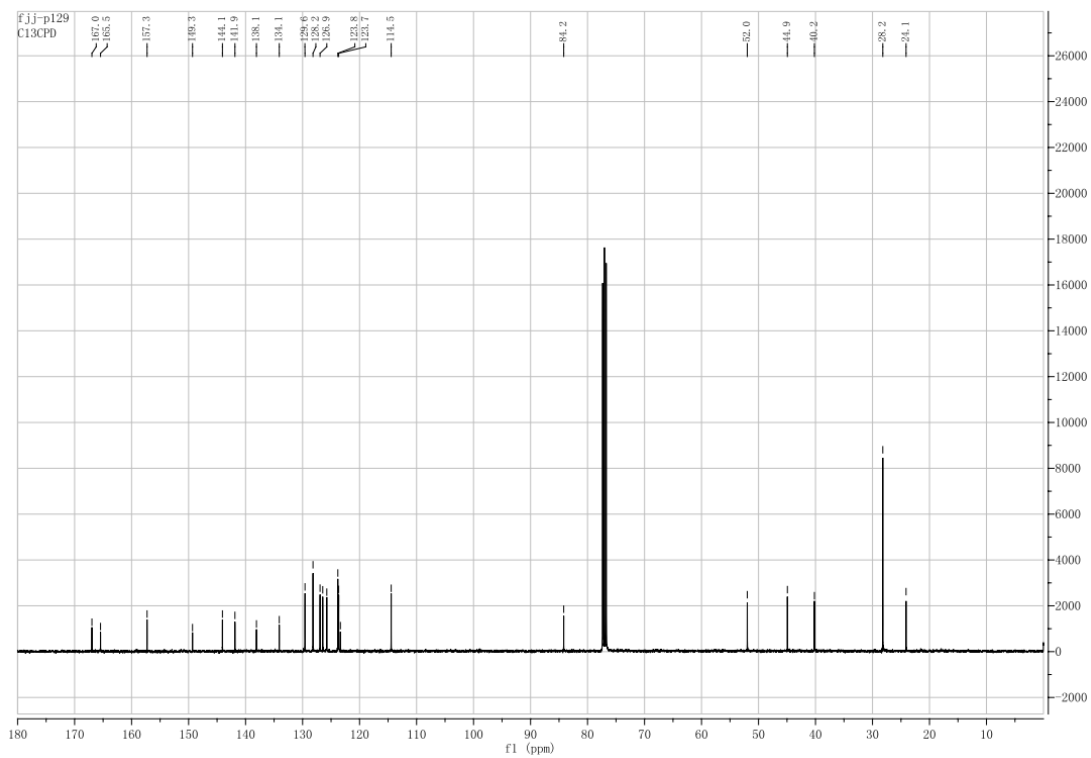



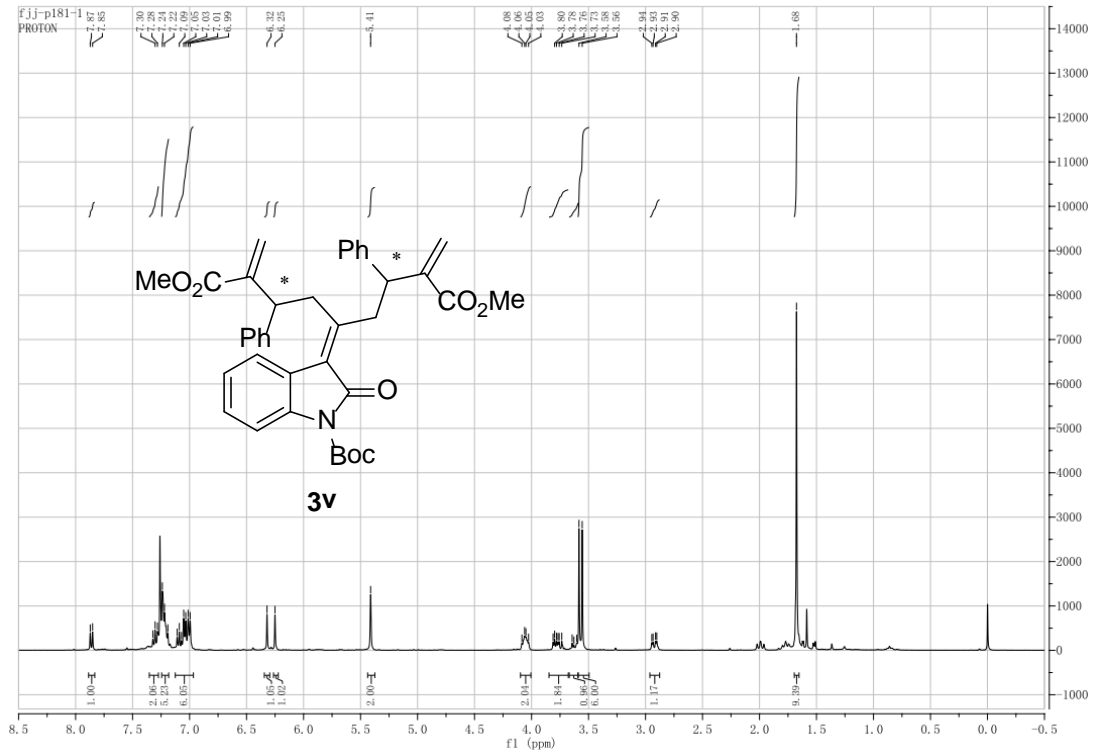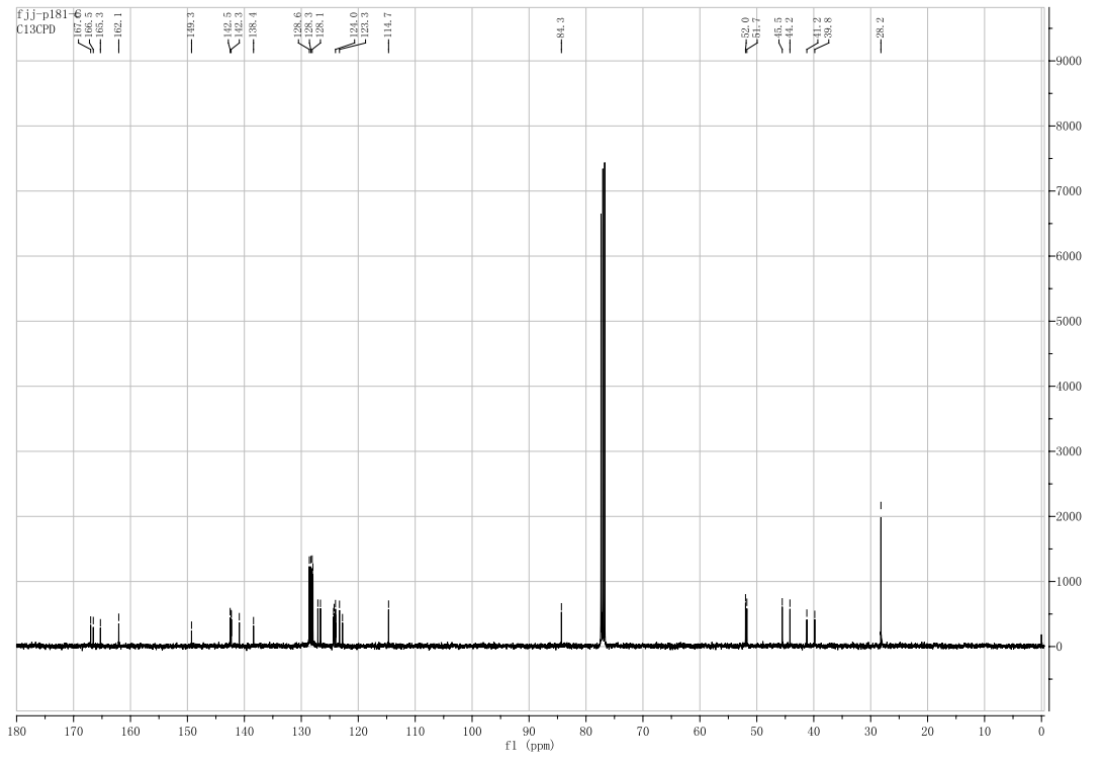

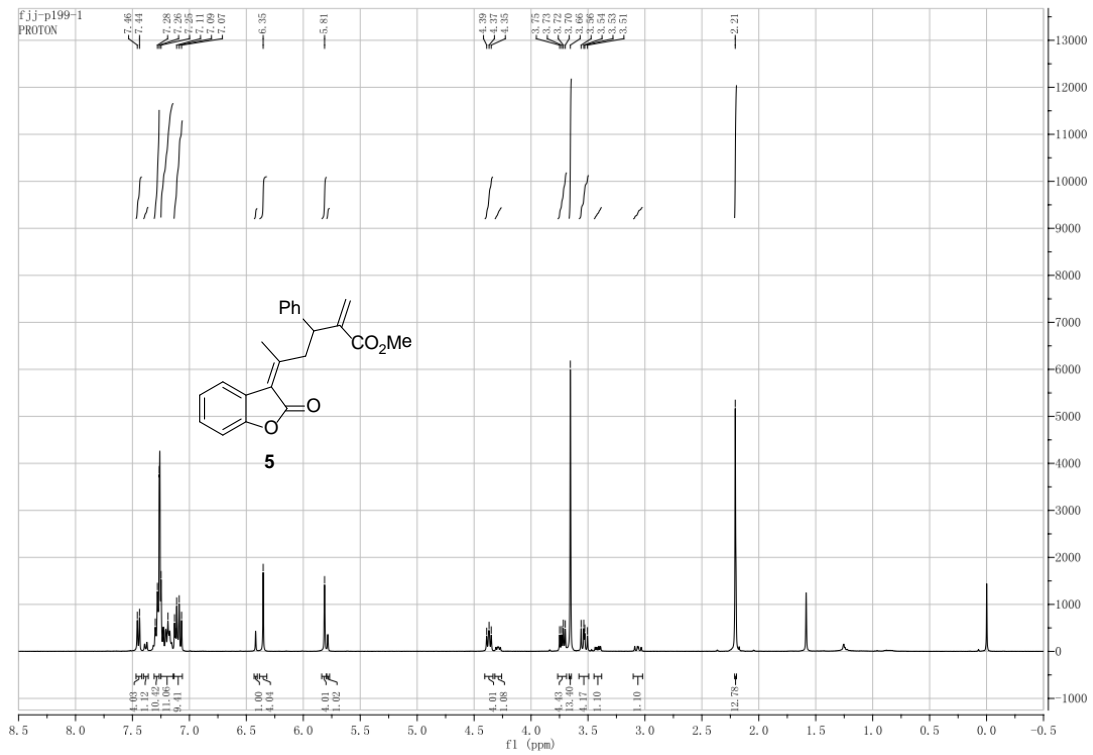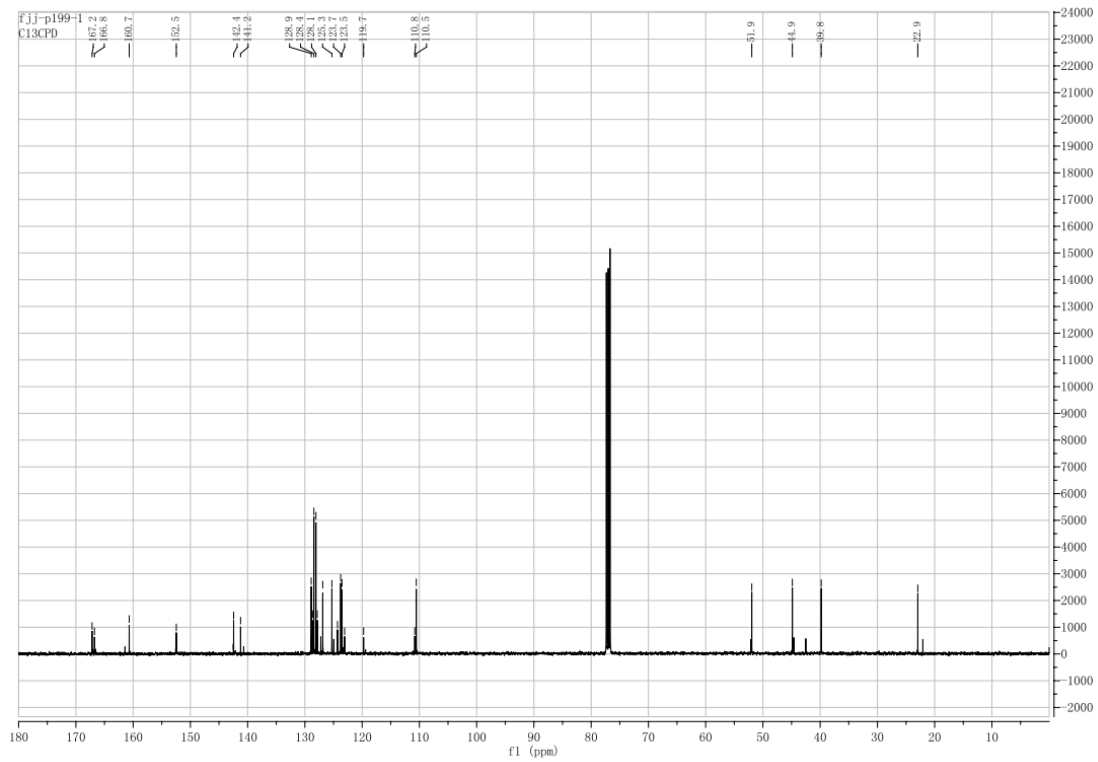

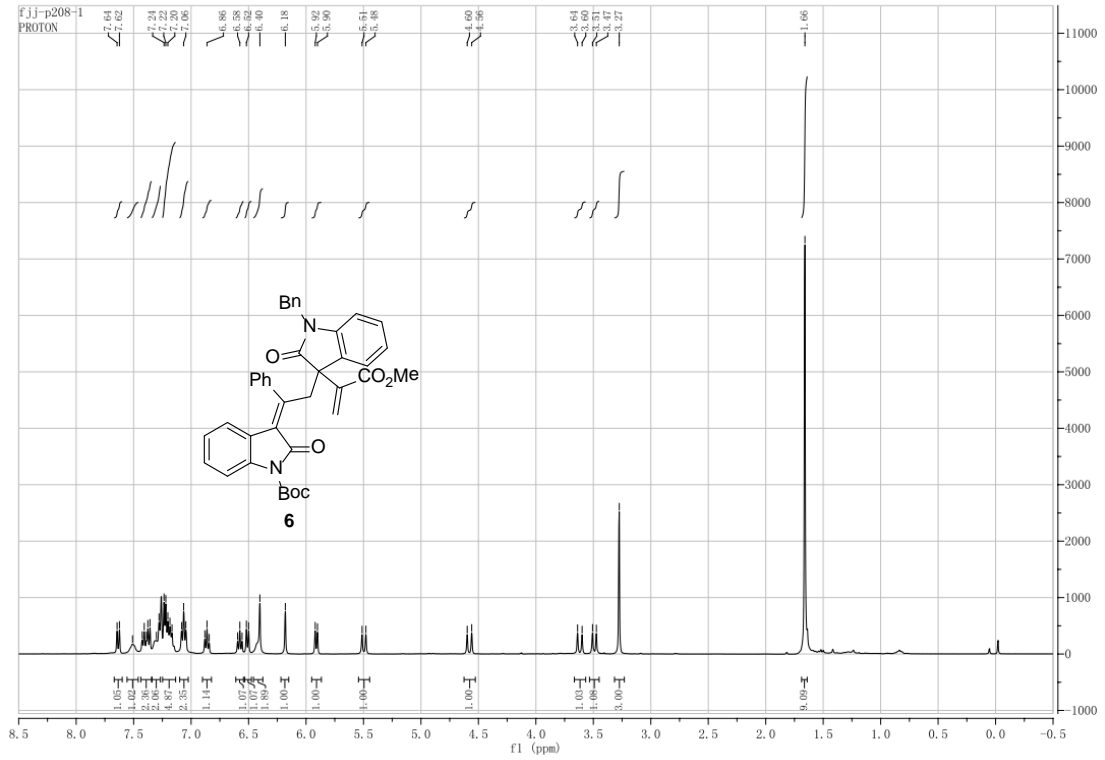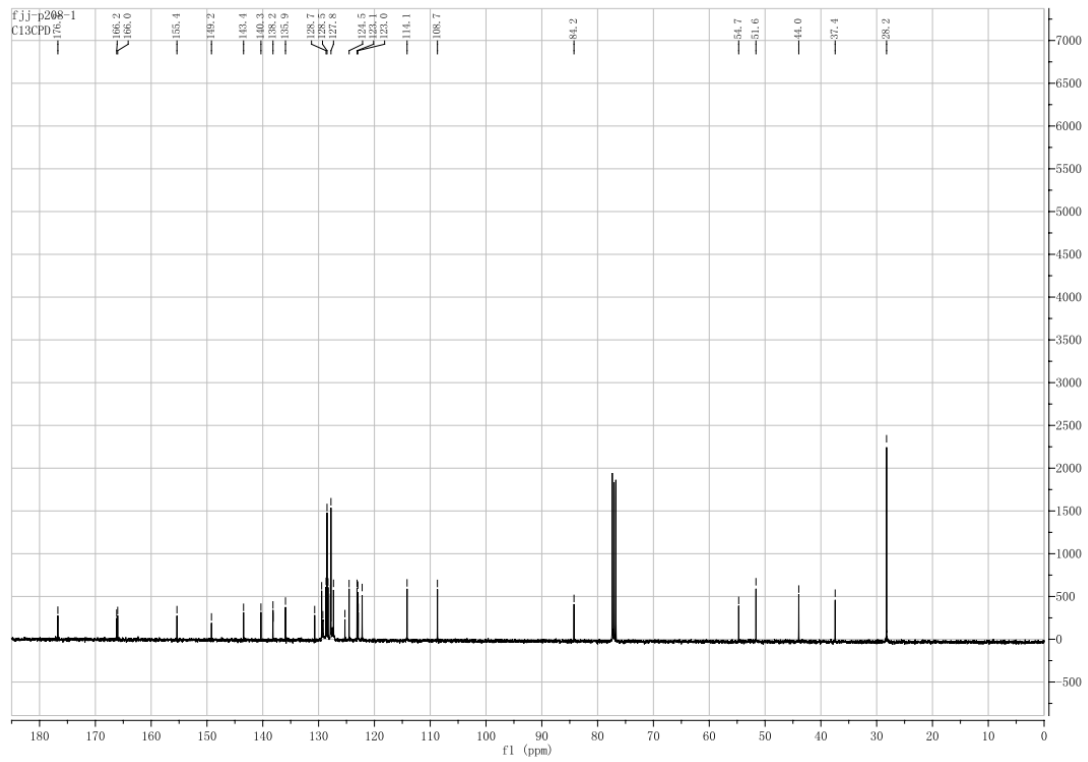

## 6. Chiral HPLC Chromatography

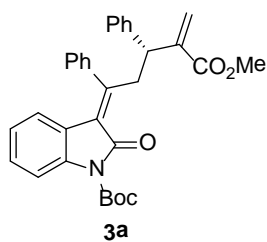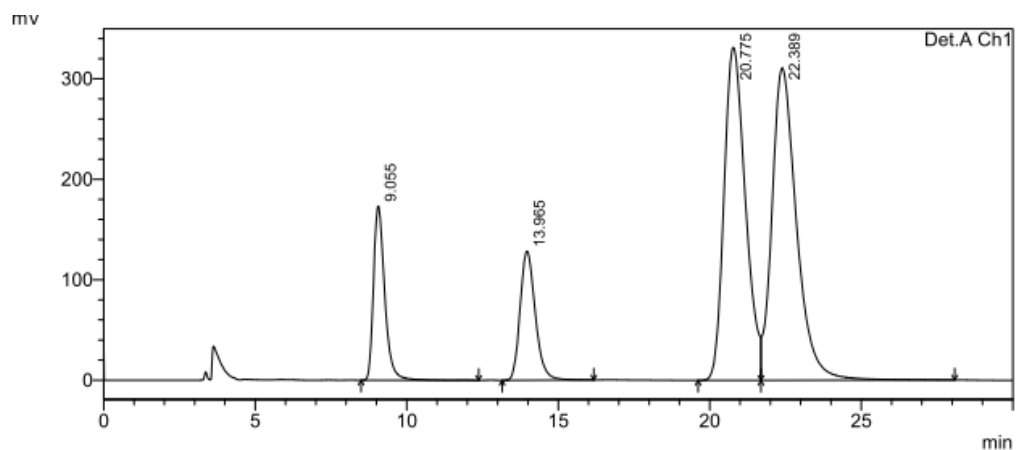

1 Det.A Ch1/210nm

PeakTable

| Detector A Ch1 210nm |           |          |        |         |          |
|----------------------|-----------|----------|--------|---------|----------|
| Peak#                | Ret. Time | Area     | Height | Area %  | Height % |
| 1                    | 9.055     | 4482124  | 173388 | 10.498  | 18.365   |
| 2                    | 13.965    | 4468621  | 128461 | 10.466  | 13.607   |
| 3                    | 20.775    | 16201393 | 331378 | 37.947  | 35.099   |
| 4                    | 22.389    | 17542731 | 310888 | 41.089  | 32.929   |
| Total                |           | 42694869 | 944116 | 100.000 | 100.000  |

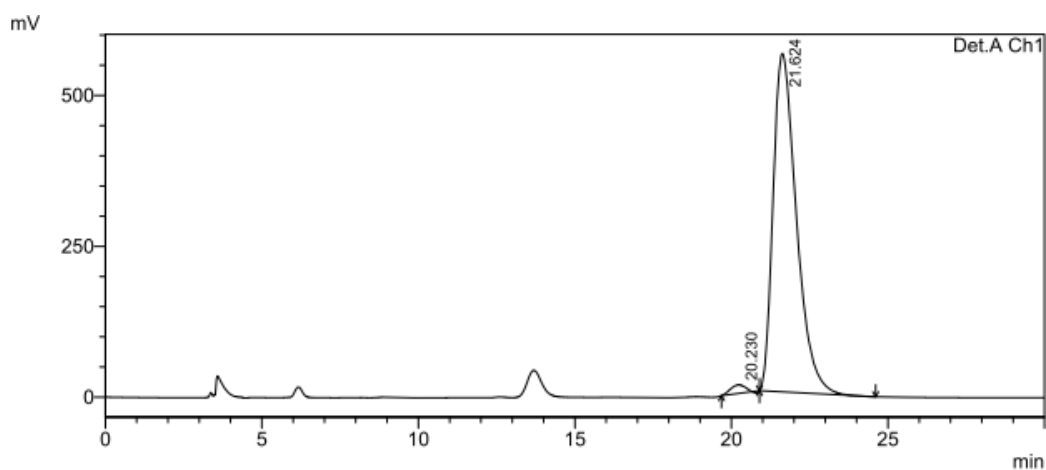

1 Det.A Ch1/210nm

PeakTable

| Detector A Ch1 210nm |           |          |        |         |          |
|----------------------|-----------|----------|--------|---------|----------|
| Peak#                | Ret. Time | Area     | Height | Area %  | Height % |
| 1                    | 20.230    | 439477   | 14102  | 1.496   | 2.453    |
| 2                    | 21.624    | 28945297 | 560710 | 98.504  | 97.547   |
| Total                |           | 29384773 | 574811 | 100.000 | 100.000  |

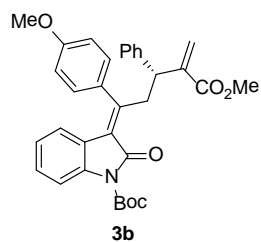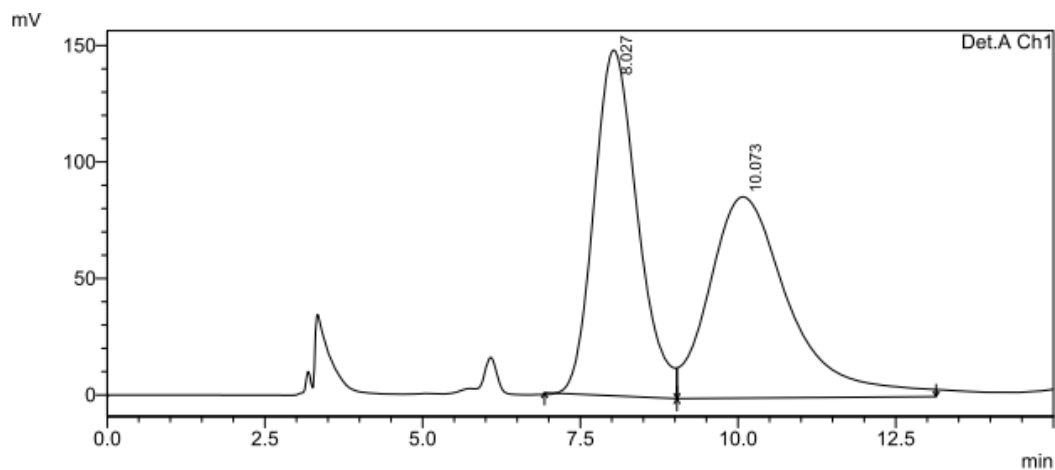

PeakTable

| Peak# | Ret. Time | Area     | Height | Area %  | Height % |
|-------|-----------|----------|--------|---------|----------|
| 1     | 8.027     | 7105115  | 148386 | 48.374  | 63.205   |
| 2     | 10.073    | 7582761  | 86381  | 51.626  | 36.795   |
| Total |           | 14687876 | 234767 | 100.000 | 100.000  |

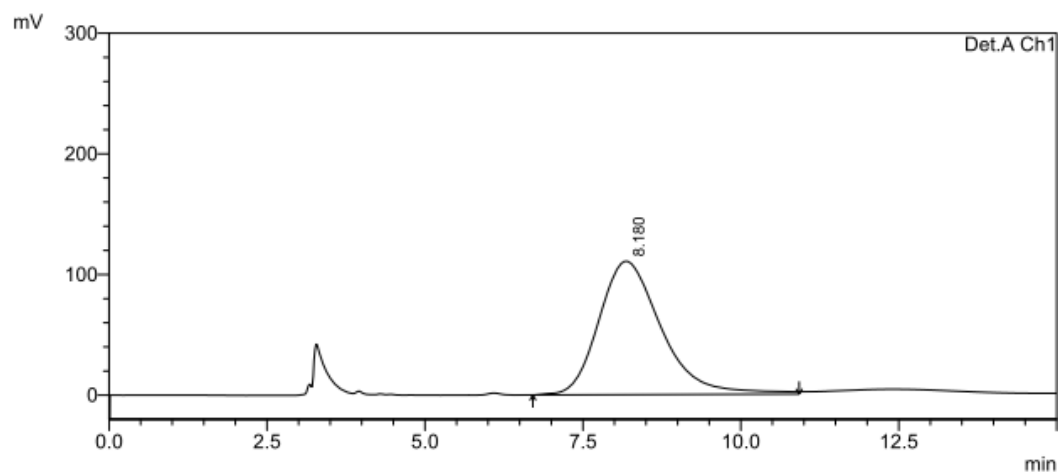

PeakTable

| Peak# | Ret. Time | Area    | Height | Area %  | Height % |
|-------|-----------|---------|--------|---------|----------|
| 1     | 8.180     | 7620185 | 110650 | 100.000 | 100.000  |
| Total |           | 7620185 | 110650 | 100.000 | 100.000  |

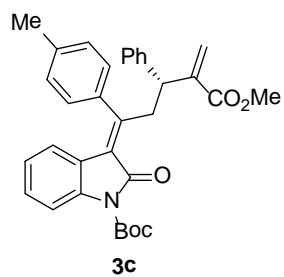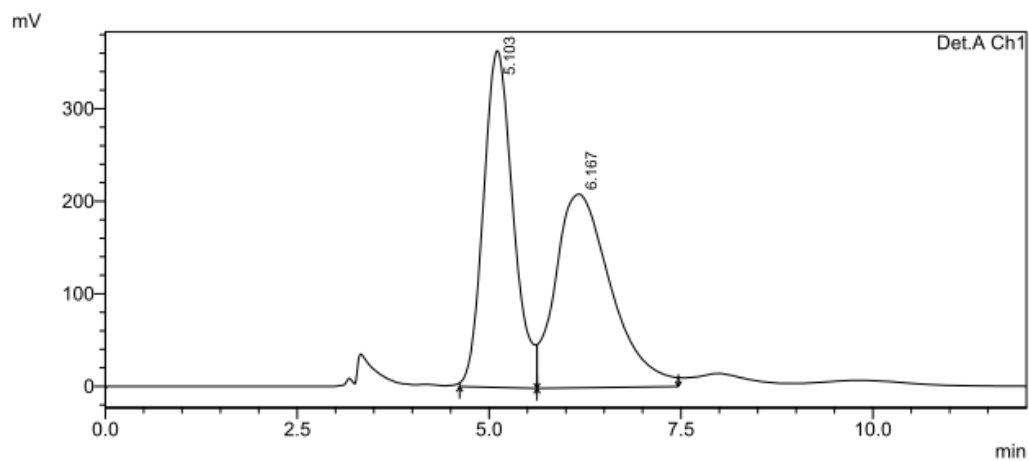

PeakTable

| Peak# | Ret. Time | Area     | Height | Area %  | Height % |
|-------|-----------|----------|--------|---------|----------|
| 1     | 5.103     | 9796815  | 363718 | 48.149  | 63.479   |
| 2     | 6.167     | 10549918 | 209257 | 51.851  | 36.521   |
| Total |           | 20346733 | 572975 | 100.000 | 100.000  |

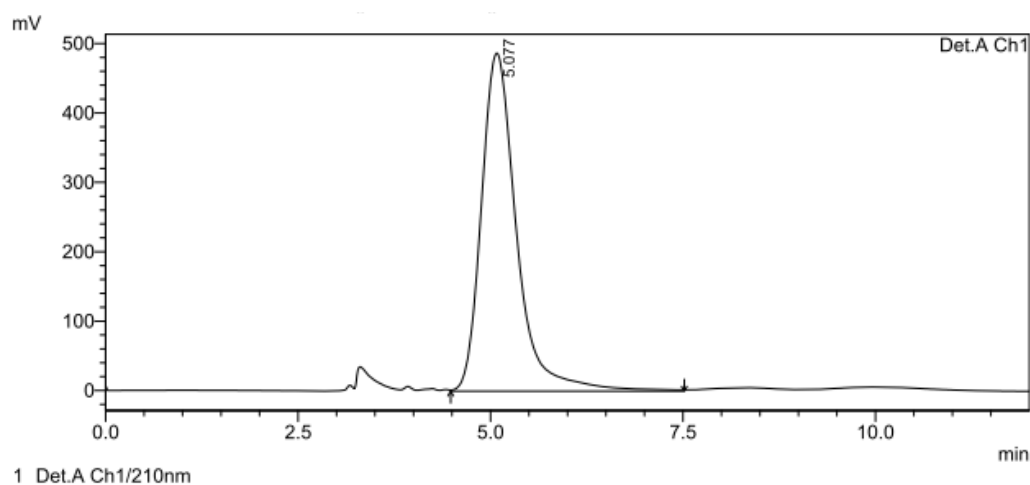

PeakTable

| Peak# | Ret. Time | Area     | Height | Area %  | Height % |
|-------|-----------|----------|--------|---------|----------|
| 1     | 5.077     | 15494336 | 487100 | 100.000 | 100.000  |
| Total |           | 15494336 | 487100 | 100.000 | 100.000  |

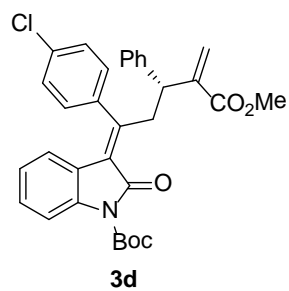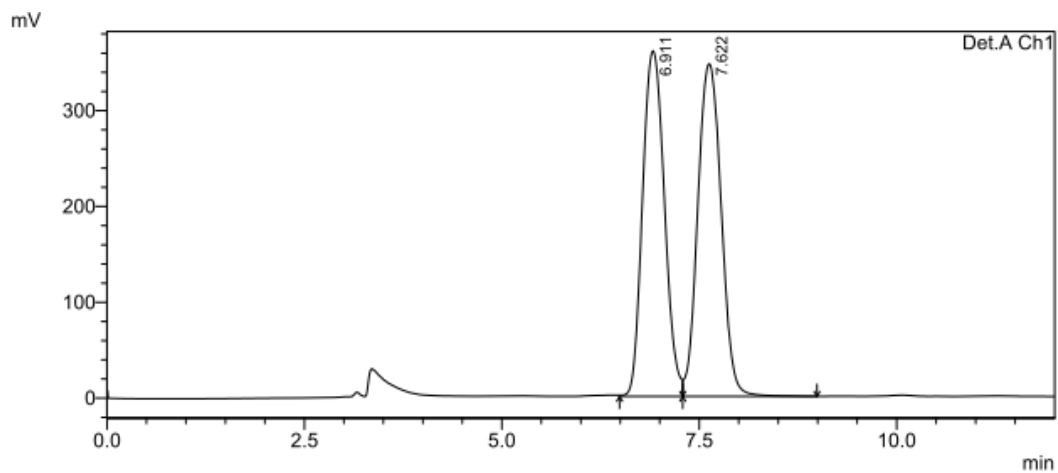

PeakTable

| Peak# | Ret. Time | Area     | Height | Area %  | Height % |
|-------|-----------|----------|--------|---------|----------|
| 1     | 6.911     | 6931941  | 360498 | 49.157  | 50.953   |
| 2     | 7.622     | 7169833  | 347014 | 50.843  | 49.047   |
| Total |           | 14101774 | 707512 | 100.000 | 100.000  |

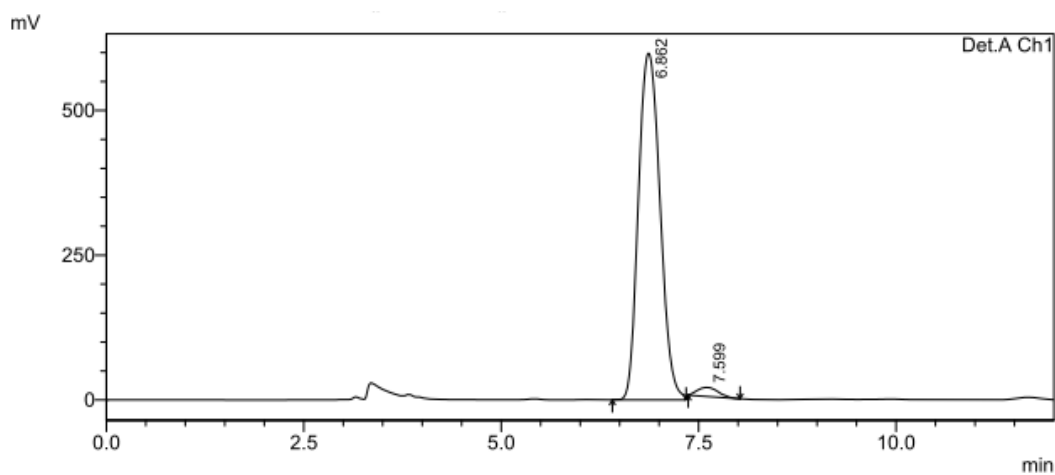

PeakTable

| Peak# | Ret. Time | Area     | Height | Area %  | Height % |
|-------|-----------|----------|--------|---------|----------|
| 1     | 6.862     | 11442031 | 598841 | 97.556  | 97.468   |
| 2     | 7.599     | 286604   | 15559  | 2.444   | 2.532    |
| Total |           | 11728635 | 614400 | 100.000 | 100.000  |

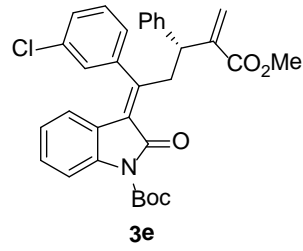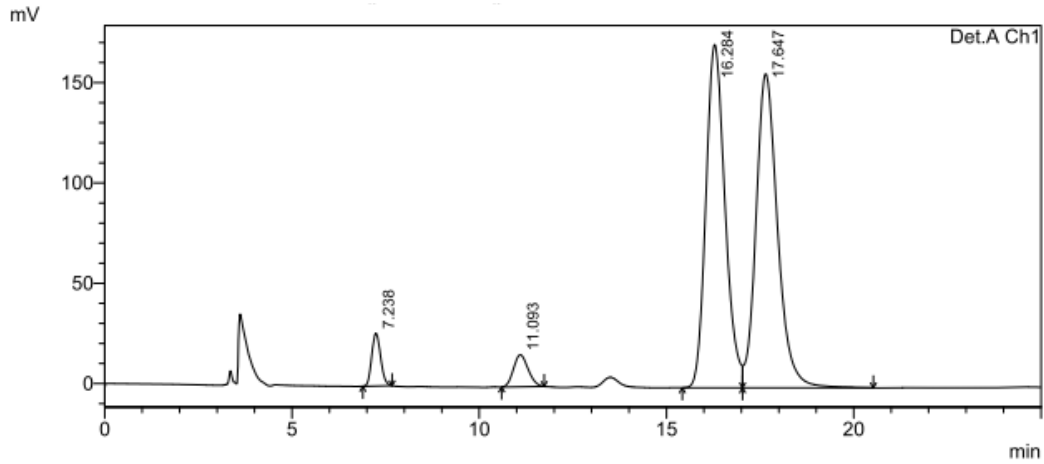

PeakTable

| Peak# | Ret. Time | Area     | Height | Area %  | Height % |
|-------|-----------|----------|--------|---------|----------|
| 1     | 7.238     | 435993   | 26248  | 3.307   | 7.097    |
| 2     | 11.093    | 432243   | 15924  | 3.278   | 4.306    |
| 3     | 16.284    | 6066313  | 171055 | 46.009  | 46.253   |
| 4     | 17.647    | 6250538  | 156599 | 47.406  | 42.344   |
| Total |           | 13185087 | 369826 | 100.000 | 100.000  |

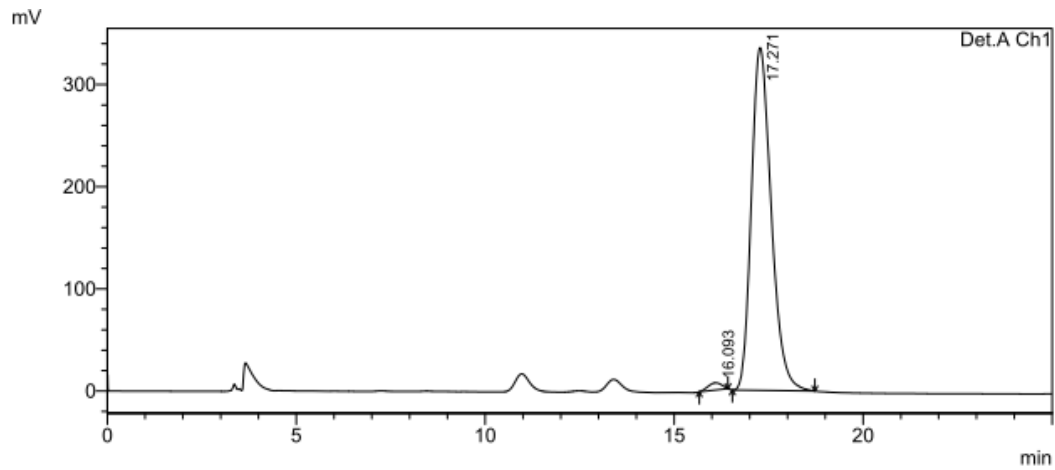

PeakTable

| Peak# | Ret. Time | Area     | Height | Area %  | Height % |
|-------|-----------|----------|--------|---------|----------|
| 1     | 16.093    | 176893   | 7018   | 1.424   | 2.050    |
| 2     | 17.271    | 12249262 | 335375 | 98.576  | 97.950   |
| Total |           | 12426155 | 342394 | 100.000 | 100.000  |



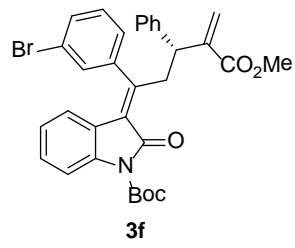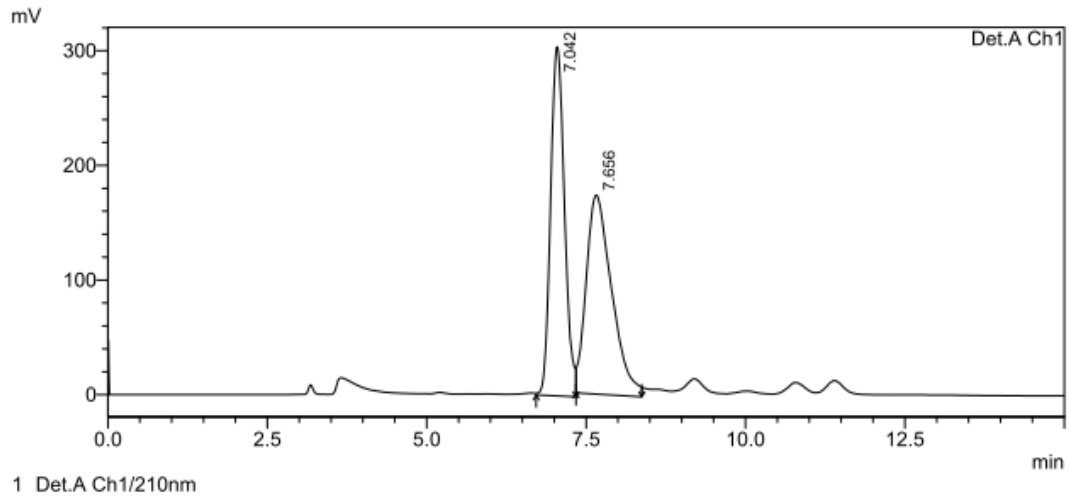

PeakTable

| Detector A Ch1 210nm |           |         |        |         |          |
|----------------------|-----------|---------|--------|---------|----------|
| Peak#                | Ret. Time | Area    | Height | Area %  | Height % |
| 1                    | 7.042     | 4616848 | 304441 | 48.889  | 63.701   |
| 2                    | 7.656     | 4826695 | 173484 | 51.111  | 36.299   |
| Total                |           | 9443543 | 477925 | 100.000 | 100.000  |

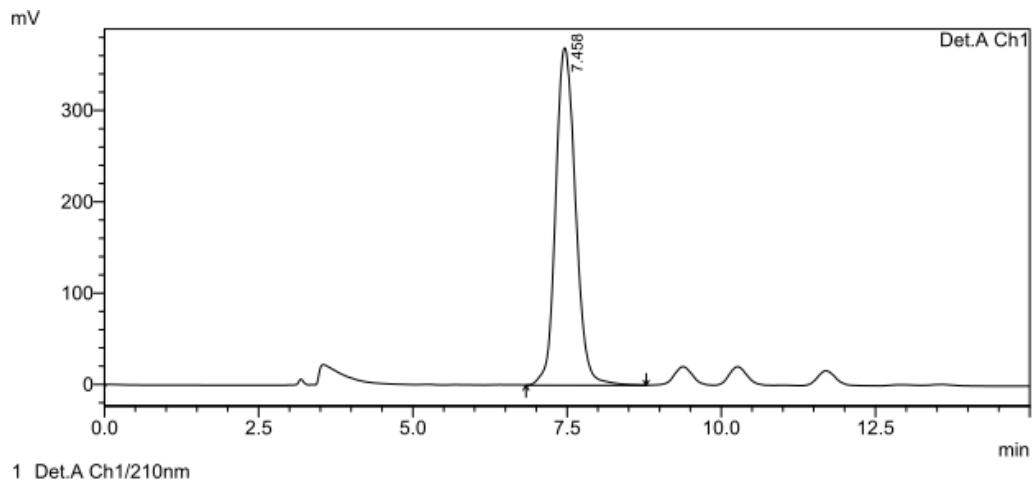

PeakTable

| Detector A Ch1 210nm |           |         |        |         |          |
|----------------------|-----------|---------|--------|---------|----------|
| Peak#                | Ret. Time | Area    | Height | Area %  | Height % |
| 1                    | 7.458     | 8329989 | 369396 | 100.000 | 100.000  |
| Total                |           | 8329989 | 369396 | 100.000 | 100.000  |

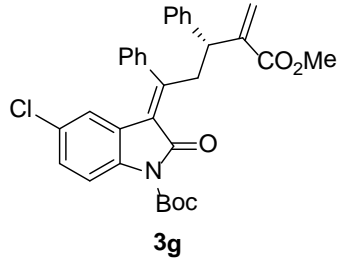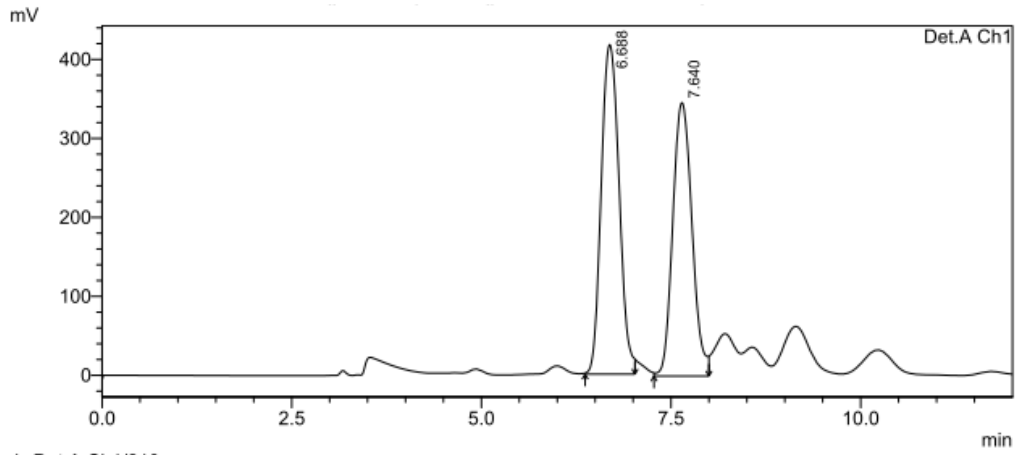

1 Det.A Ch1/210nm

PeakTable

| Detector A Ch1 210nm |           |          |        |         |          |
|----------------------|-----------|----------|--------|---------|----------|
| Peak#                | Ret. Time | Area     | Height | Area %  | Height % |
| 1                    | 6.688     | 6839656  | 417438 | 52.792  | 54.668   |
| 2                    | 7.640     | 6116083  | 346146 | 47.208  | 45.332   |
| Total                |           | 12955739 | 763584 | 100.000 | 100.000  |

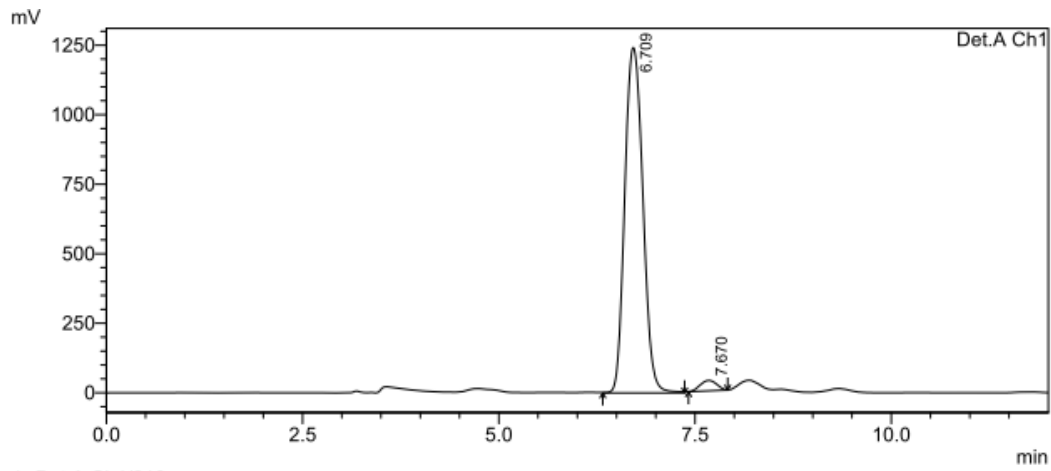

1 Det.A Ch1/210nm

PeakTable

| Detector A Ch1 210nm |           |          |         |         |          |
|----------------------|-----------|----------|---------|---------|----------|
| Peak#                | Ret. Time | Area     | Height  | Area %  | Height % |
| 1                    | 6.709     | 19907245 | 1241363 | 97.317  | 97.067   |
| 2                    | 7.670     | 548900   | 37509   | 2.683   | 2.933    |
| Total                |           | 20456145 | 1278872 | 100.000 | 100.000  |

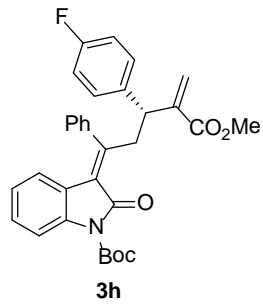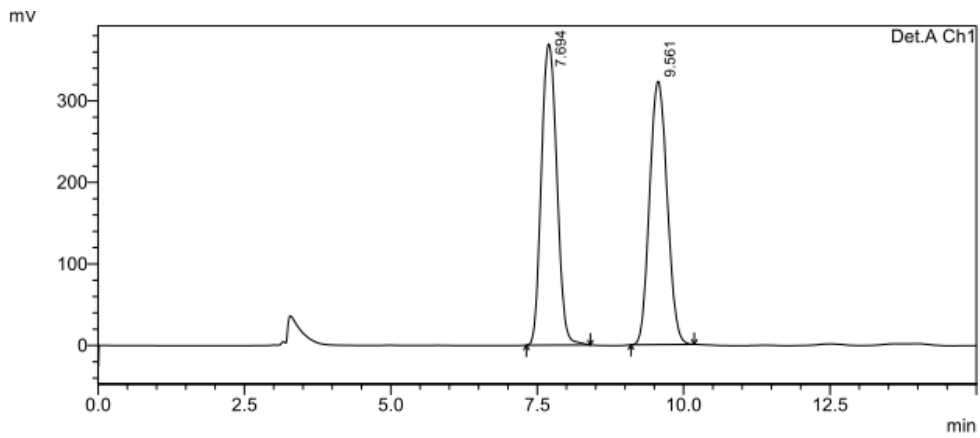

1 Det.A Ch1/210nm

PeakTable

| Peak# | Ret. Time | Area     | Height | Area %  | Height % |
|-------|-----------|----------|--------|---------|----------|
| 1     | 7.694     | 6806827  | 369507 | 50.193  | 53.349   |
| 2     | 9.561     | 6754446  | 323117 | 49.807  | 46.651   |
| Total |           | 13561273 | 692623 | 100.000 | 100.000  |

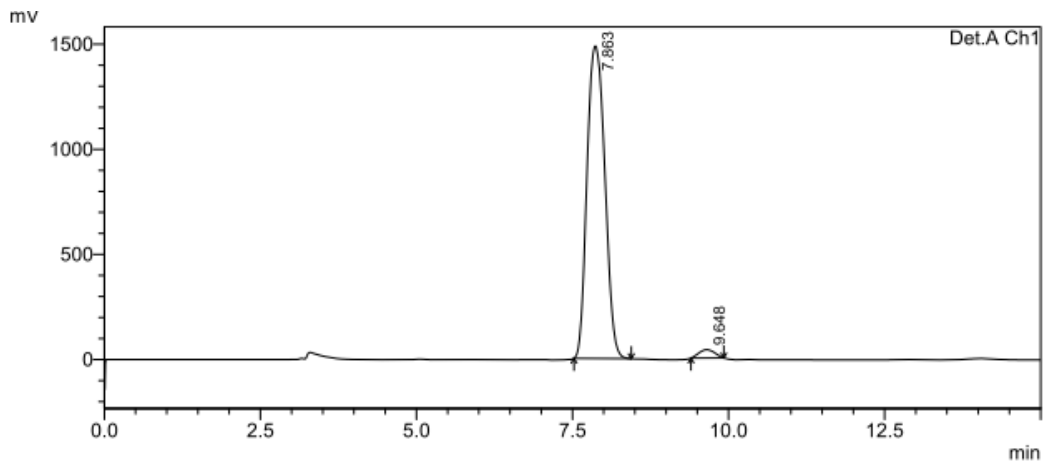

1 Det.A Ch1/210nm

PeakTable

| Peak# | Ret. Time | Area     | Height  | Area %  | Height % |
|-------|-----------|----------|---------|---------|----------|
| 1     | 7.863     | 29589551 | 1486063 | 97.688  | 97.419   |
| 2     | 9.648     | 700157   | 39366   | 2.312   | 2.581    |
| Total |           | 30289708 | 1525429 | 100.000 | 100.000  |

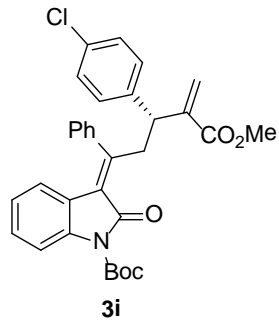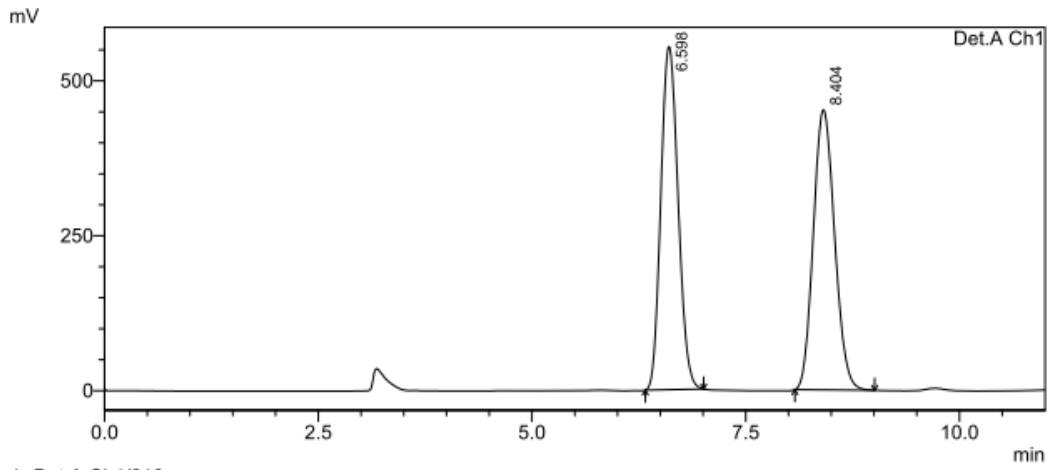

PeakTable

| Peak# | Ret. Time | Area     | Height  | Area %  | Height % |
|-------|-----------|----------|---------|---------|----------|
| 1     | 6.598     | 7770422  | 553819  | 49.829  | 55.054   |
| 2     | 8.404     | 7823610  | 452133  | 50.171  | 44.946   |
| Total |           | 15594032 | 1005952 | 100.000 | 100.000  |

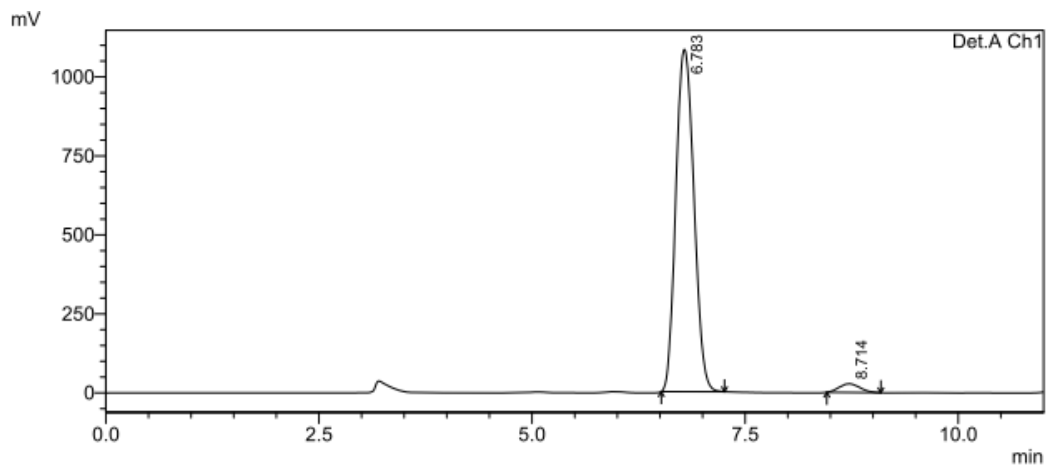

PeakTable

| Peak# | Ret. Time | Area     | Height  | Area %  | Height % |
|-------|-----------|----------|---------|---------|----------|
| 1     | 6.783     | 15994906 | 1083159 | 97.180  | 97.537   |
| 2     | 8.714     | 464208   | 27353   | 2.820   | 2.463    |
| Total |           | 16459114 | 1110511 | 100.000 | 100.000  |

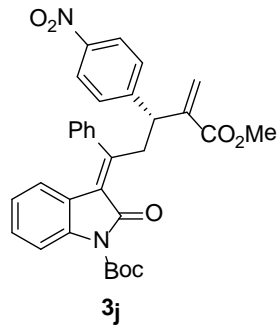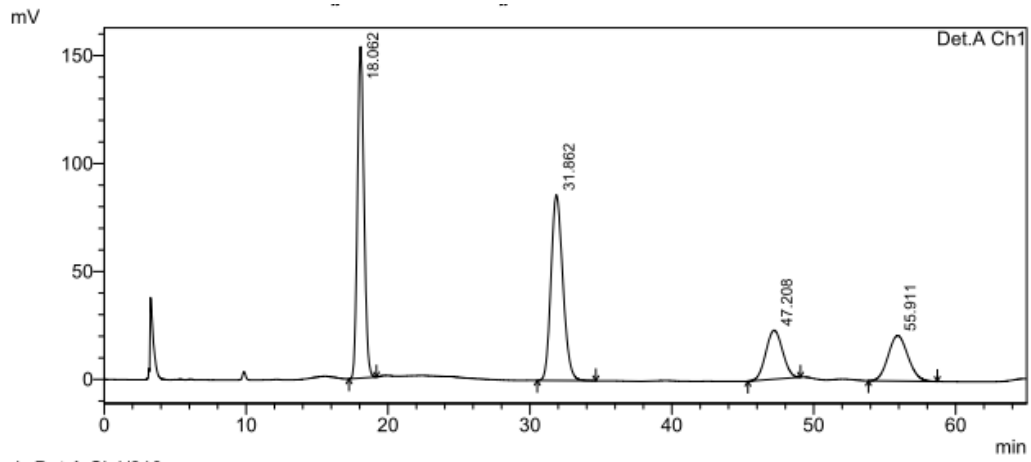

PeakTable

| Peak# | Ret. Time | Area     | Height | Area %  | Height % |
|-------|-----------|----------|--------|---------|----------|
| 1     | 18.062    | 4971744  | 153559 | 35.820  | 54.218   |
| 2     | 31.862    | 5003519  | 85976  | 36.049  | 30.356   |
| 3     | 47.208    | 1856957  | 22631  | 13.379  | 7.990    |
| 4     | 55.911    | 2047716  | 21060  | 14.753  | 7.436    |
| Total |           | 13879935 | 283226 | 100.000 | 100.000  |

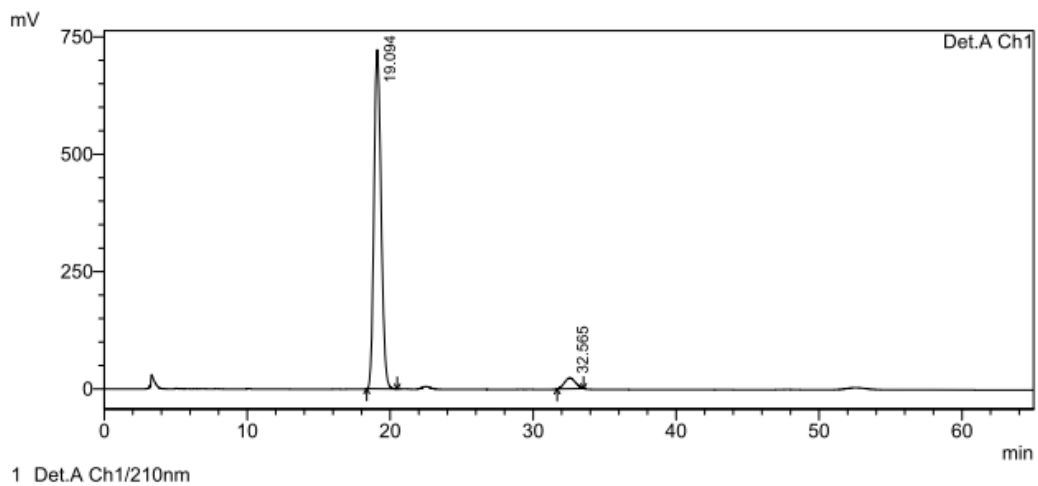

PeakTable

| Peak# | Ret. Time | Area     | Height | Area %  | Height % |
|-------|-----------|----------|--------|---------|----------|
| 1     | 19.094    | 24893729 | 722394 | 95.301  | 96.927   |
| 2     | 32.565    | 1227382  | 22905  | 4.699   | 3.073    |
| Total |           | 26121111 | 745298 | 100.000 | 100.000  |

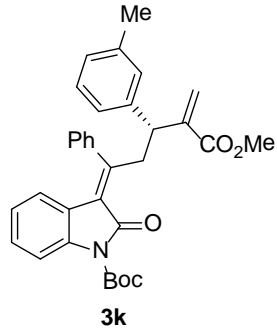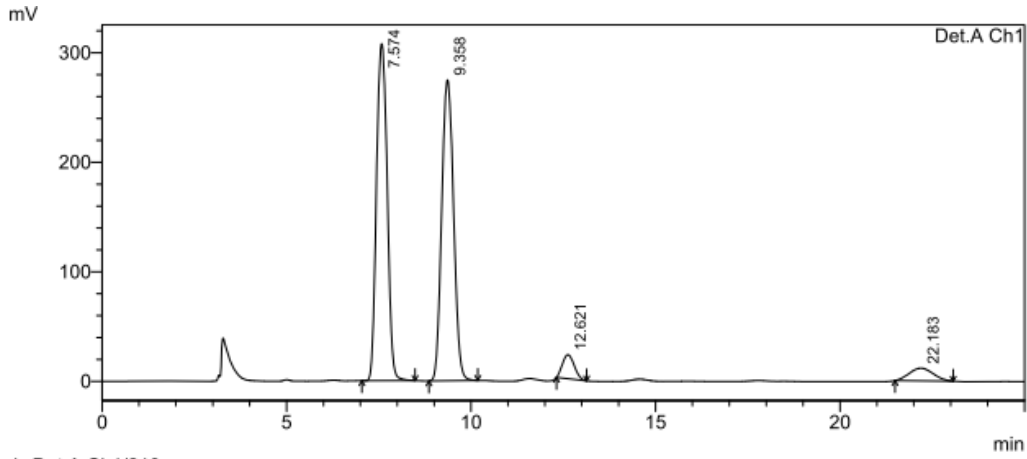

PeakTable

| Peak# | Ret. Time | Area     | Height | Area %  | Height % |
|-------|-----------|----------|--------|---------|----------|
| 1     | 7.574     | 6227556  | 307633 | 46.488  | 49.964   |
| 2     | 9.358     | 6162144  | 274610 | 46.000  | 44.601   |
| 3     | 12.621    | 485535   | 21882  | 3.624   | 3.554    |
| 4     | 22.183    | 520787   | 11581  | 3.888   | 1.881    |
| Total |           | 13396021 | 615706 | 100.000 | 100.000  |

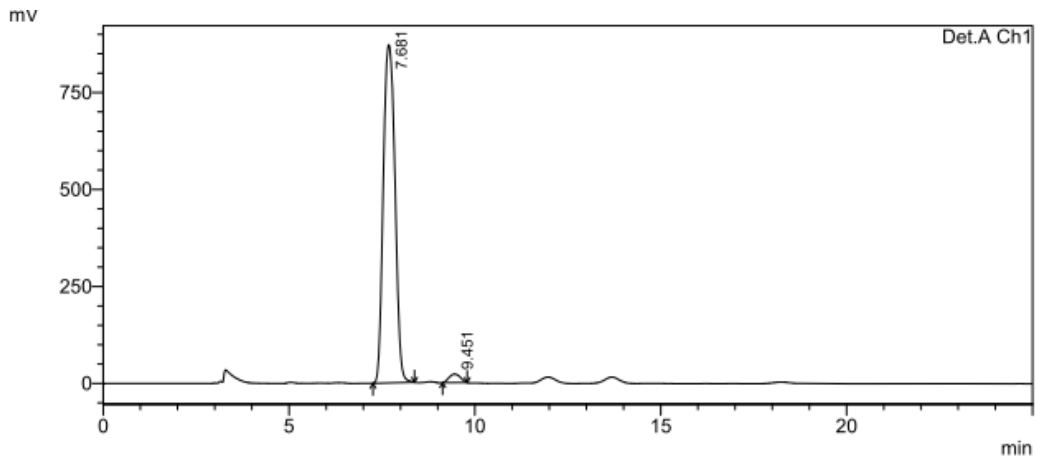

PeakTable

| Peak# | Ret. Time | Area     | Height | Area %  | Height % |
|-------|-----------|----------|--------|---------|----------|
| 1     | 7.681     | 19032818 | 871538 | 97.634  | 97.556   |
| 2     | 9.451     | 461249   | 21836  | 2.366   | 2.444    |
| Total |           | 19494068 | 893374 | 100.000 | 100.000  |

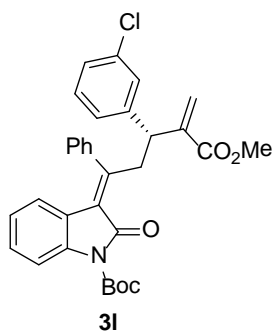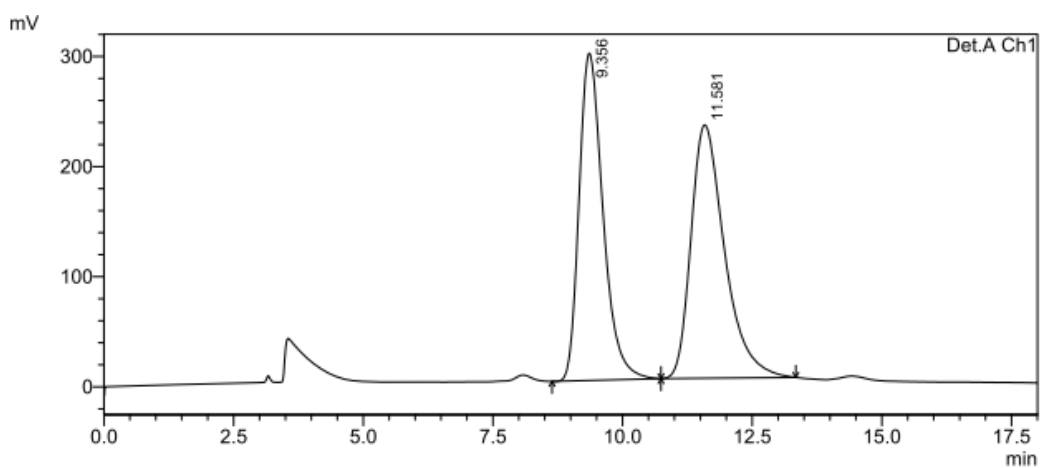

| Peak# | Ret. Time | Area     | Height | Area %  | Height % |
|-------|-----------|----------|--------|---------|----------|
| 1     | 9.356     | 9530093  | 297173 | 47.892  | 56.362   |
| 2     | 11.581    | 10369080 | 230085 | 52.108  | 43.638   |
| Total |           | 19899173 | 527257 | 100.000 | 100.000  |

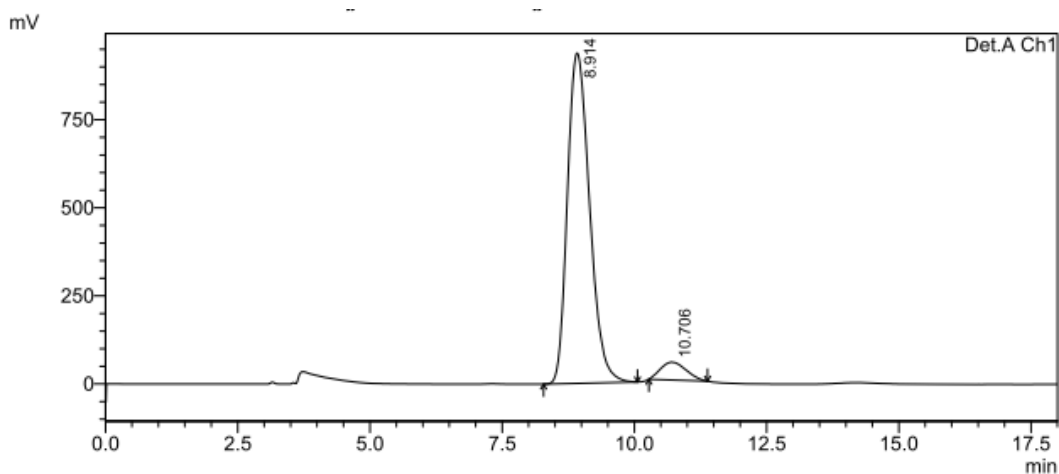

PeakTable

| Peak# | Ret. Time | Area     | Height | Area %  | Height % |
|-------|-----------|----------|--------|---------|----------|
| 1     | 8.914     | 27391790 | 937829 | 94.121  | 94.873   |
| 2     | 10.706    | 1711007  | 50685  | 5.879   | 5.127    |
| Total |           | 29102797 | 988514 | 100.000 | 100.000  |

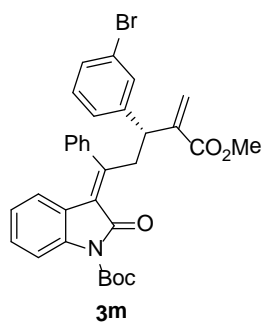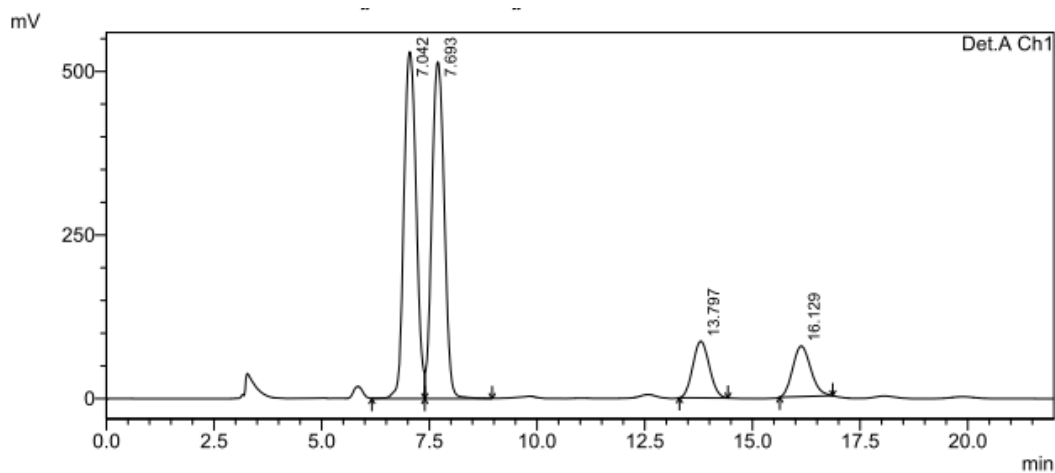

1 Det.A Ch1/210nm

PeakTable

| Peak# | Ret. Time | Area     | Height  | Area %  | Height % |
|-------|-----------|----------|---------|---------|----------|
| 1     | 7.042     | 10519576 | 529804  | 41.388  | 43.855   |
| 2     | 7.693     | 10338682 | 514557  | 40.676  | 42.593   |
| 3     | 13.797    | 2306563  | 86484   | 9.075   | 7.159    |
| 4     | 16.129    | 2252292  | 77239   | 8.861   | 6.394    |
| Total |           | 25417112 | 1208084 | 100.000 | 100.000  |

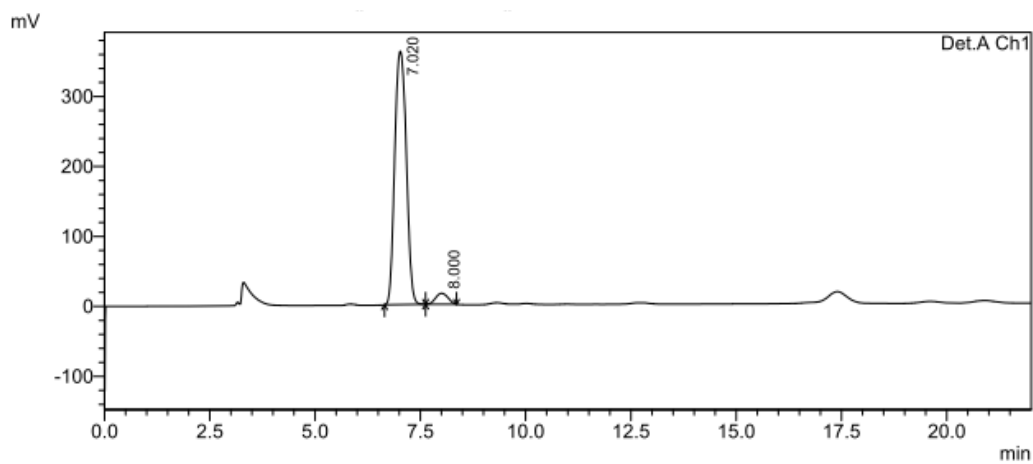

1 Det.A Ch1/210nm

PeakTable

| Peak# | Ret. Time | Area    | Height | Area %  | Height % |
|-------|-----------|---------|--------|---------|----------|
| 1     | 7.020     | 6922112 | 362042 | 95.640  | 95.876   |
| 2     | 8.000     | 315576  | 15573  | 4.360   | 4.124    |
| Total |           | 7237688 | 377615 | 100.000 | 100.000  |



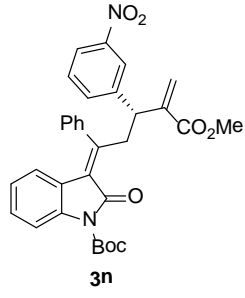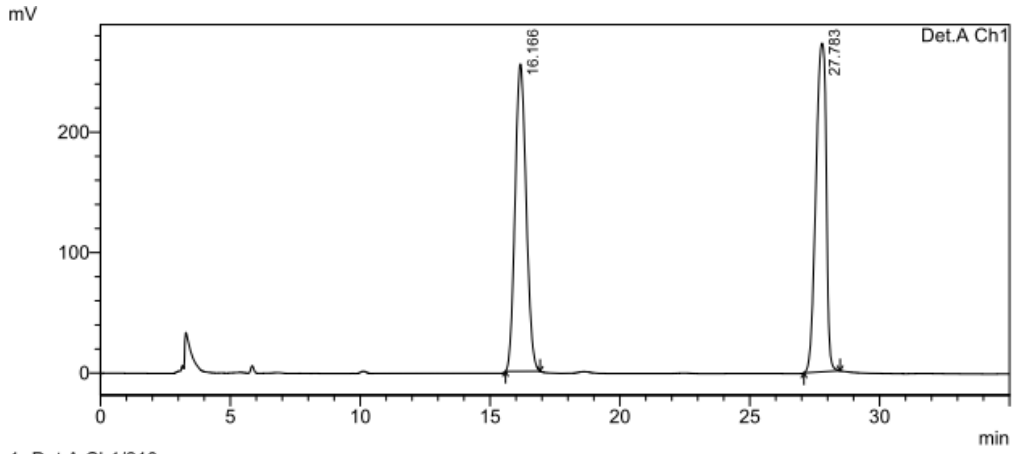

PeakTable

| Peak# | Ret. Time | Area     | Height | Area %  | Height % |
|-------|-----------|----------|--------|---------|----------|
| 1     | 16.166    | 7557934  | 255072 | 50.072  | 48.322   |
| 2     | 27.783    | 7536052  | 272782 | 49.928  | 51.678   |
| Total |           | 15093985 | 527855 | 100.000 | 100.000  |

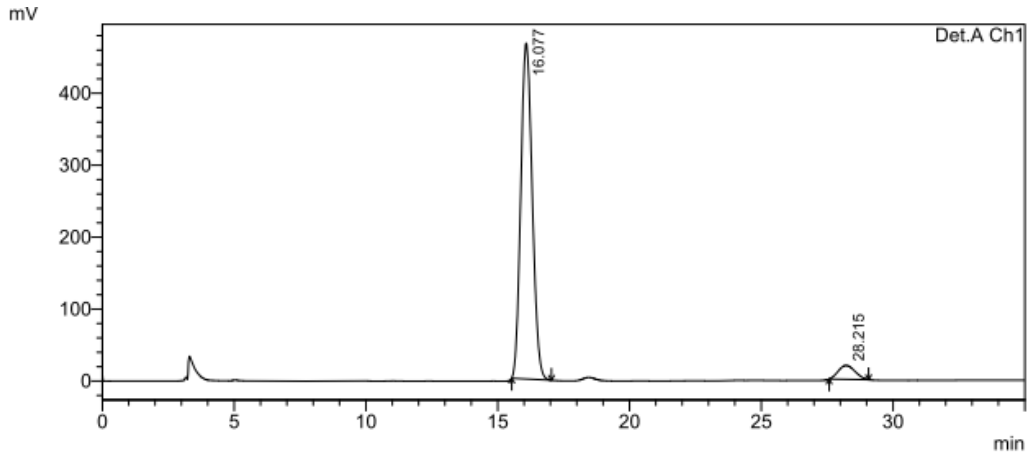

PeakTable

| Peak# | Ret. Time | Area     | Height | Area %  | Height % |
|-------|-----------|----------|--------|---------|----------|
| 1     | 16.077    | 14075324 | 466774 | 94.285  | 96.029   |
| 2     | 28.215    | 853172   | 19301  | 5.715   | 3.971    |
| Total |           | 14928496 | 486075 | 100.000 | 100.000  |

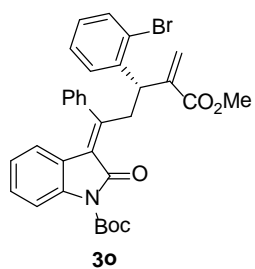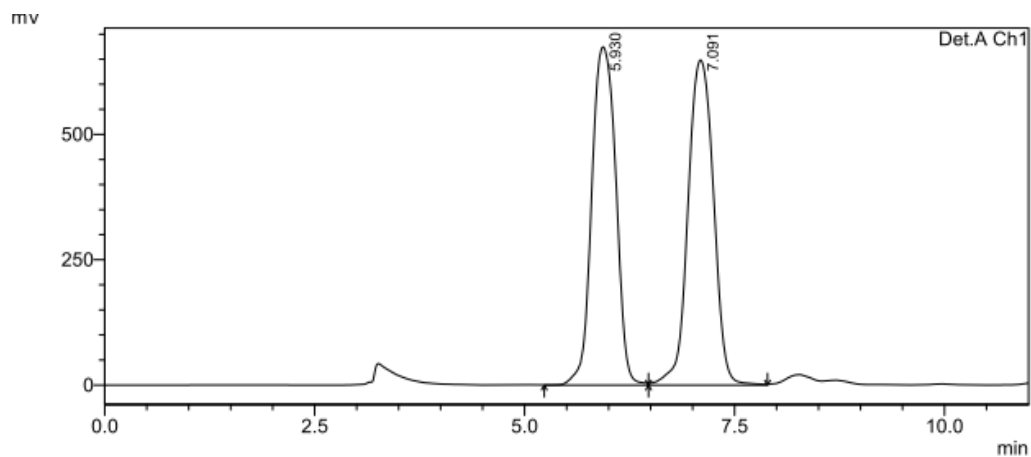

1 Det.A Ch1/210nm

PeakTable

Detector A Ch1 210nm

| Peak# | Ret. Time | Area     | Height  | Area %  | Height % |
|-------|-----------|----------|---------|---------|----------|
| 1     | 5.930     | 13491322 | 674632  | 49.499  | 50.992   |
| 2     | 7.091     | 13764401 | 648383  | 50.501  | 49.008   |
| Total |           | 27255723 | 1323014 | 100.000 | 100.000  |

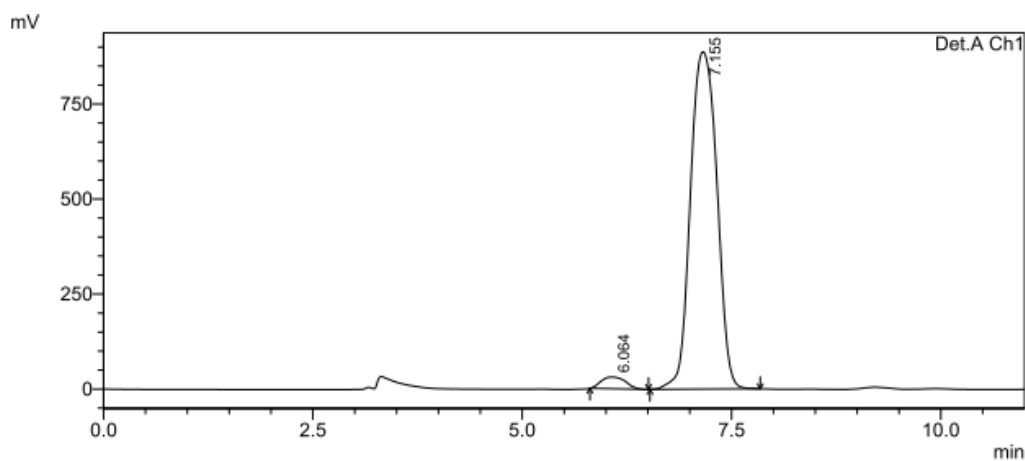

1 Det.A Ch1/210nm

PeakTable

Detector A Ch1 210nm

| Peak# | Ret. Time | Area     | Height | Area %  | Height % |
|-------|-----------|----------|--------|---------|----------|
| 1     | 6.064     | 621920   | 30785  | 3.085   | 3.352    |
| 2     | 7.155     | 19539102 | 887532 | 96.915  | 96.648   |
| Total |           | 20161022 | 918317 | 100.000 | 100.000  |

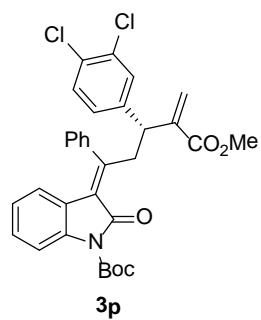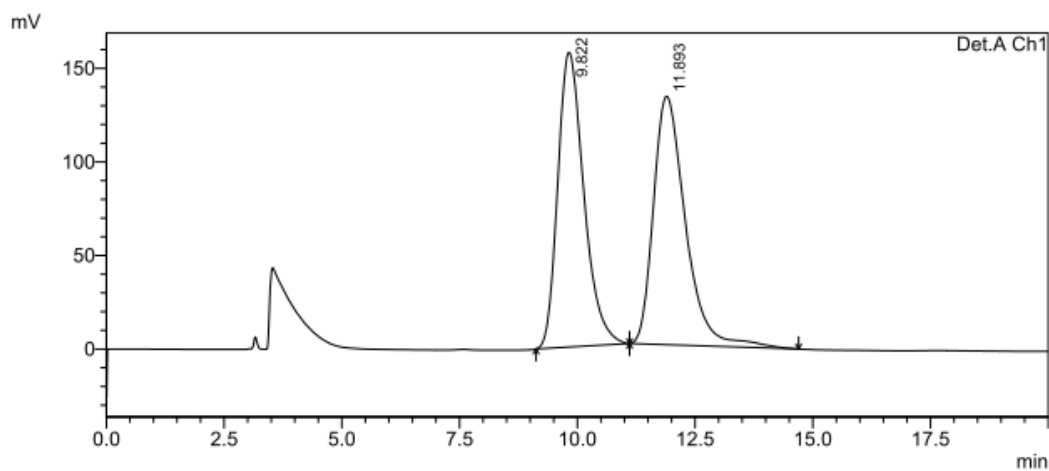

PeakTable

| Peak# | Ret. Time | Area     | Height | Area %  | Height % |
|-------|-----------|----------|--------|---------|----------|
| 1     | 9.822     | 6066815  | 157558 | 49.159  | 54.263   |
| 2     | 11.893    | 6274329  | 132802 | 50.841  | 45.737   |
| Total |           | 12341144 | 290360 | 100.000 | 100.000  |

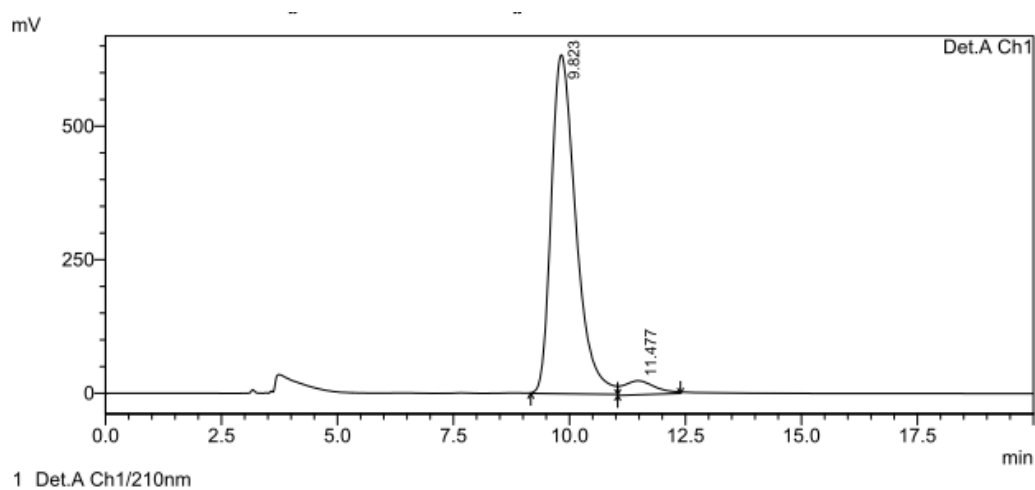

PeakTable

| Peak# | Ret. Time | Area     | Height | Area %  | Height % |
|-------|-----------|----------|--------|---------|----------|
| 1     | 9.823     | 23385158 | 634284 | 94.950  | 96.038   |
| 2     | 11.477    | 1243653  | 26169  | 5.050   | 3.962    |
| Total |           | 24628811 | 660452 | 100.000 | 100.000  |

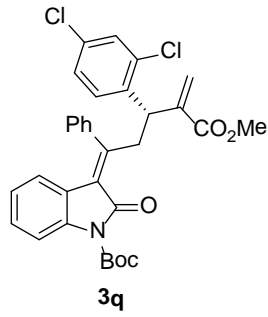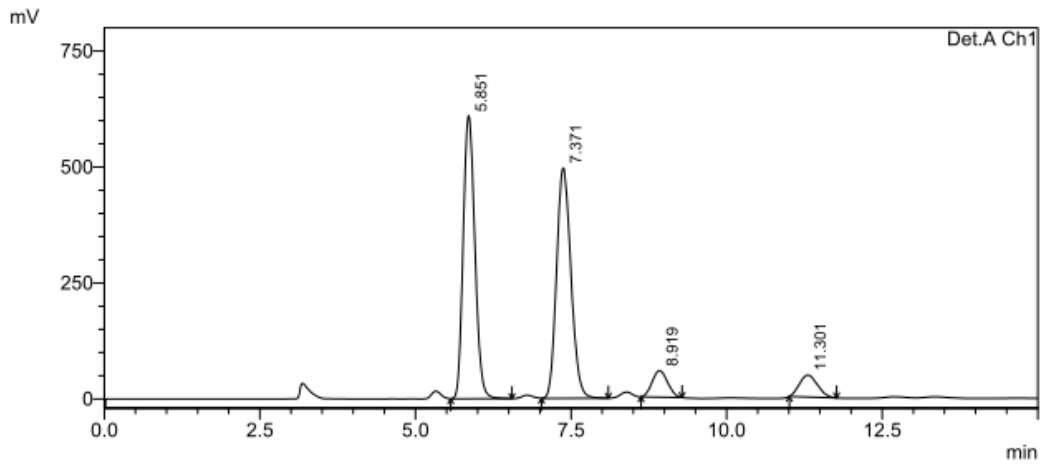

1 Det.A Ch1/210nm

PeakTable

| Peak# | Ret. Time | Area     | Height  | Area %  | Height % |
|-------|-----------|----------|---------|---------|----------|
| 1     | 5.851     | 7951542  | 609672  | 44.503  | 50.352   |
| 2     | 7.371     | 7982670  | 496751  | 44.677  | 41.026   |
| 3     | 8.919     | 984299   | 57179   | 5.509   | 4.722    |
| 4     | 11.301    | 948855   | 47208   | 5.311   | 3.899    |
| Total |           | 17867366 | 1210809 | 100.000 | 100.000  |

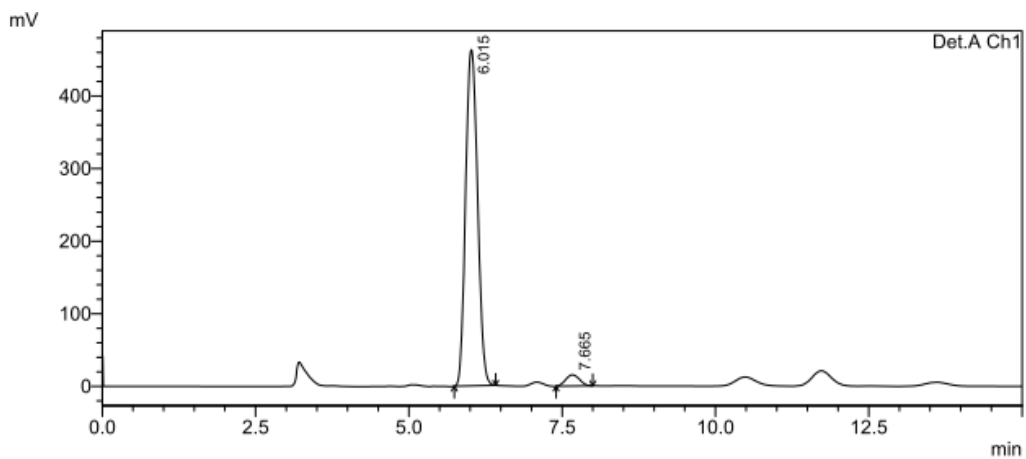

1 Det.A Ch1/210nm

PeakTable

| Peak# | Ret. Time | Area    | Height | Area %  | Height % |
|-------|-----------|---------|--------|---------|----------|
| 1     | 6.015     | 6267218 | 463102 | 96.292  | 96.771   |
| 2     | 7.665     | 241310  | 15455  | 3.708   | 3.229    |
| Total |           | 6508528 | 478557 | 100.000 | 100.000  |

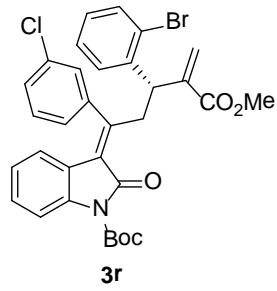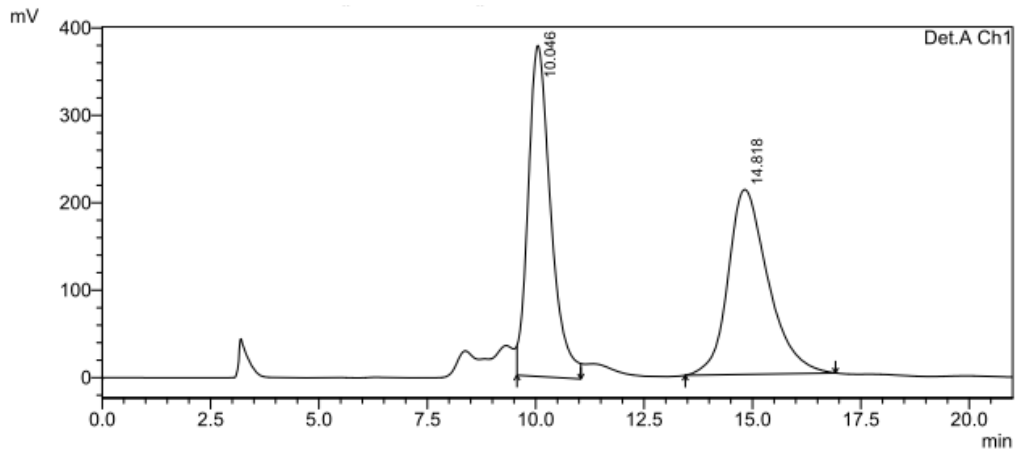

1 Det.A Ch1/210nm

PeakTable

| Peak# | Ret. Time | Area     | Height | Area %  | Height % |
|-------|-----------|----------|--------|---------|----------|
| 1     | 10.046    | 13678526 | 378467 | 50.175  | 64.141   |
| 2     | 14.818    | 13582922 | 211586 | 49.825  | 35.859   |
| Total |           | 27261448 | 590054 | 100.000 | 100.000  |

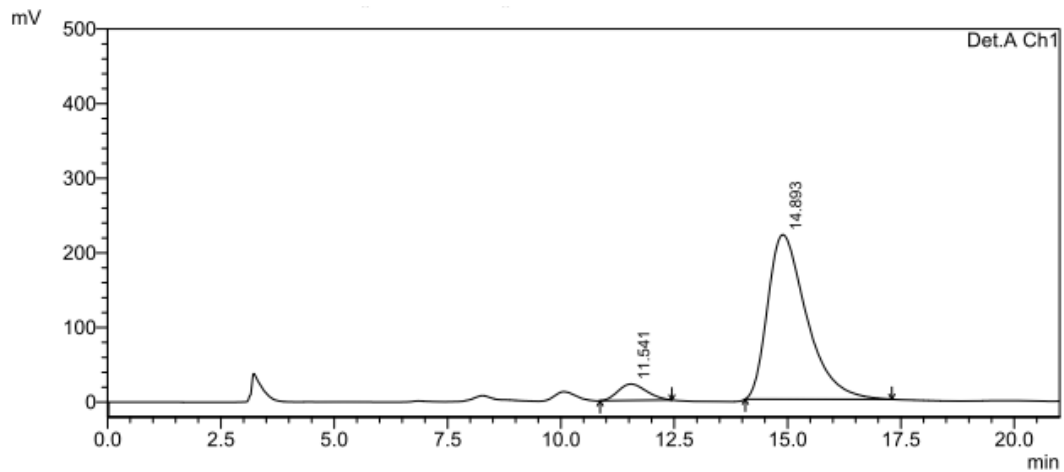

1 Det.A Ch1/210nm

PeakTable

| Peak# | Ret. Time | Area     | Height | Area %  | Height % |
|-------|-----------|----------|--------|---------|----------|
| 1     | 11.541    | 952011   | 21966  | 6.729   | 9.061    |
| 2     | 14.893    | 13196155 | 220465 | 93.271  | 90.939   |
| Total |           | 14148166 | 242432 | 100.000 | 100.000  |

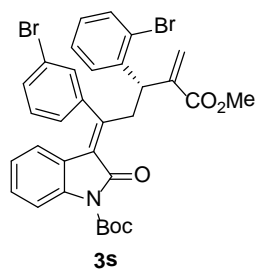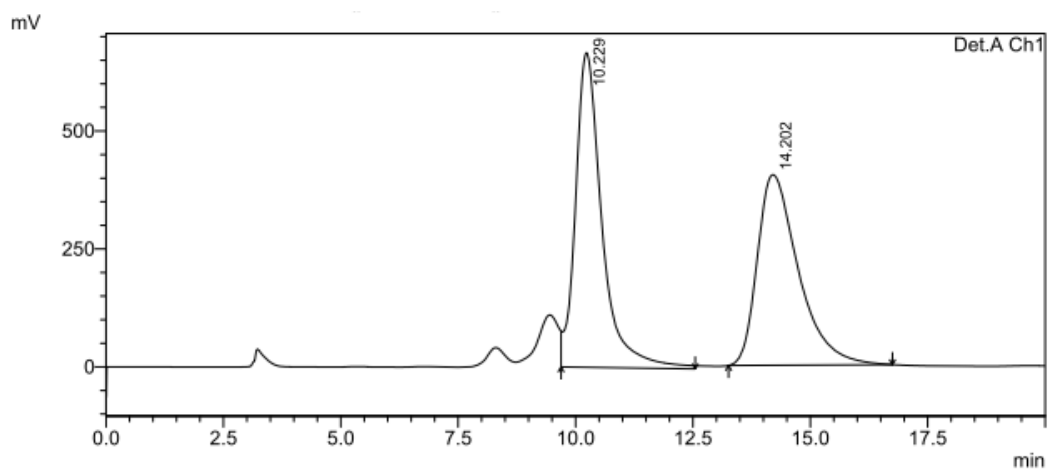

PeakTable

| Peak# | Ret. Time | Area     | Height  | Area %  | Height % |
|-------|-----------|----------|---------|---------|----------|
| 1     | 10.229    | 26119580 | 666677  | 51.549  | 62.243   |
| 2     | 14.202    | 24549843 | 404415  | 48.451  | 37.757   |
| Total |           | 50669422 | 1071092 | 100.000 | 100.000  |

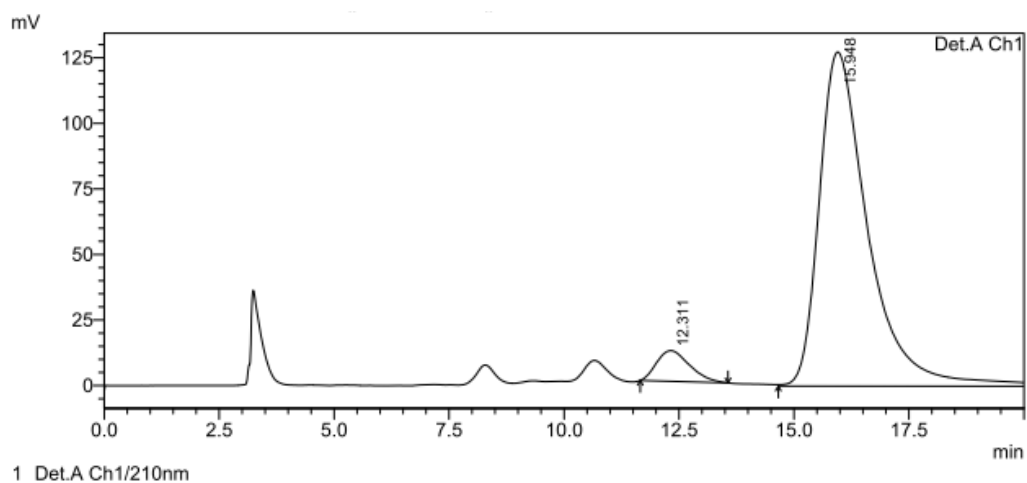

PeakTable

| Peak# | Ret. Time | Area    | Height | Area %  | Height % |
|-------|-----------|---------|--------|---------|----------|
| 1     | 12.311    | 584173  | 11705  | 5.857   | 8.415    |
| 2     | 15.948    | 9389861 | 127392 | 94.143  | 91.585   |
| Total |           | 9974034 | 139097 | 100.000 | 100.000  |

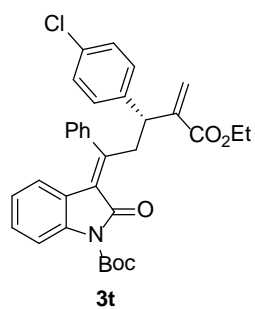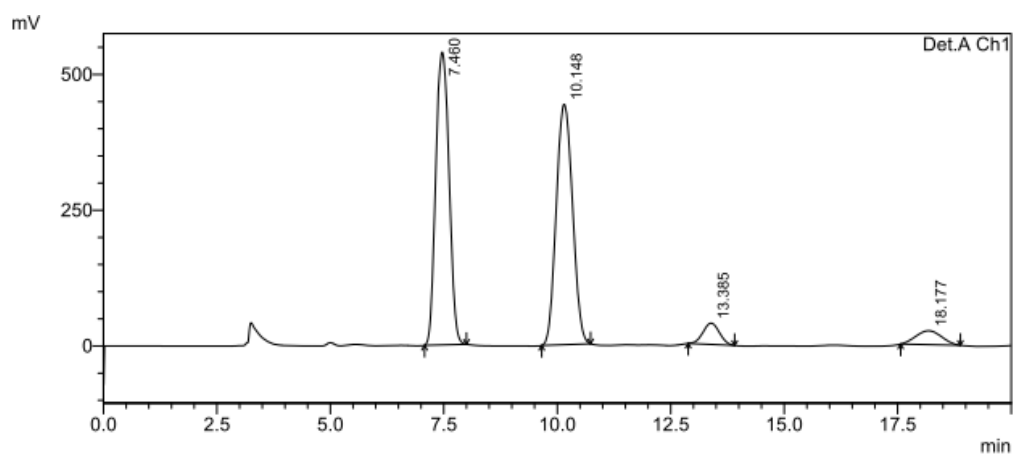

1 Det.A Ch1/210nm

PeakTable

| Peak# | Ret. Time | Area     | Height  | Area %  | Height % |
|-------|-----------|----------|---------|---------|----------|
| 1     | 7.460     | 11024759 | 539070  | 45.761  | 51.500   |
| 2     | 10.148    | 11067000 | 442733  | 45.936  | 42.297   |
| 3     | 13.385    | 990225   | 39299   | 4.110   | 3.754    |
| 4     | 18.177    | 1010045  | 25626   | 4.192   | 2.448    |
| Total |           | 24092028 | 1046728 | 100.000 | 100.000  |

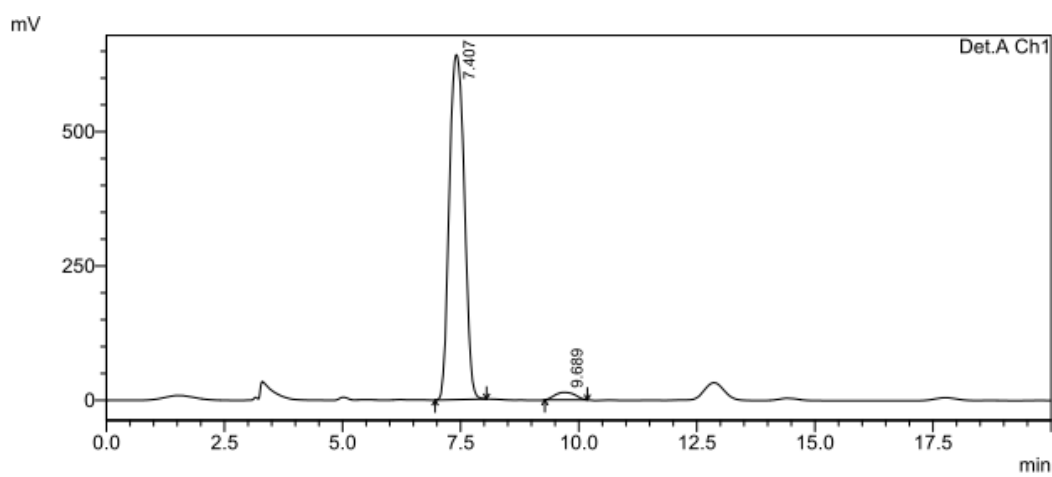

1 Det.A Ch1/210nm

PeakTable

| Peak# | Ret. Time | Area     | Height | Area %  | Height % |
|-------|-----------|----------|--------|---------|----------|
| 1     | 7.407     | 14208086 | 642209 | 97.105  | 97.874   |
| 2     | 9.689     | 423513   | 13951  | 2.895   | 2.126    |
| Total |           | 14631599 | 656160 | 100.000 | 100.000  |

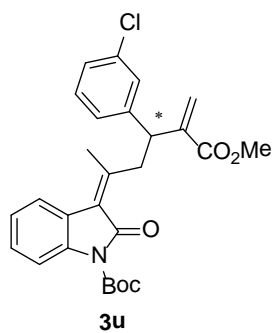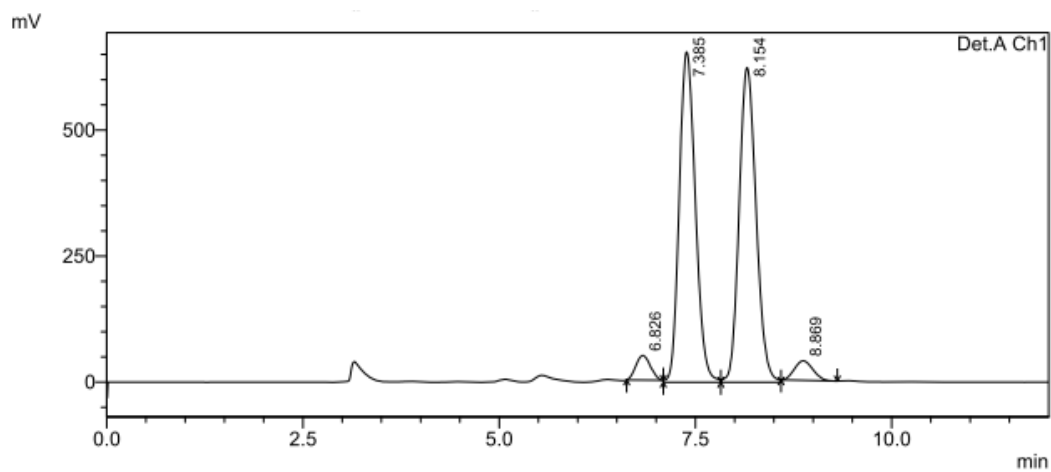

1 Det.A Ch1/210nm

PeakTable

| Detector A Ch1 210nm |           |          |         |         |          |
|----------------------|-----------|----------|---------|---------|----------|
| Peak#                | Ret. Time | Area     | Height  | Area %  | Height % |
| 1                    | 6.826     | 623038   | 48511   | 3.113   | 3.551    |
| 2                    | 7.385     | 9380798  | 654988  | 46.871  | 47.945   |
| 3                    | 8.154     | 9380089  | 623966  | 46.868  | 45.674   |
| 4                    | 8.869     | 630092   | 38657   | 3.148   | 2.830    |
| Total                |           | 20014017 | 1366121 | 100.000 | 100.000  |

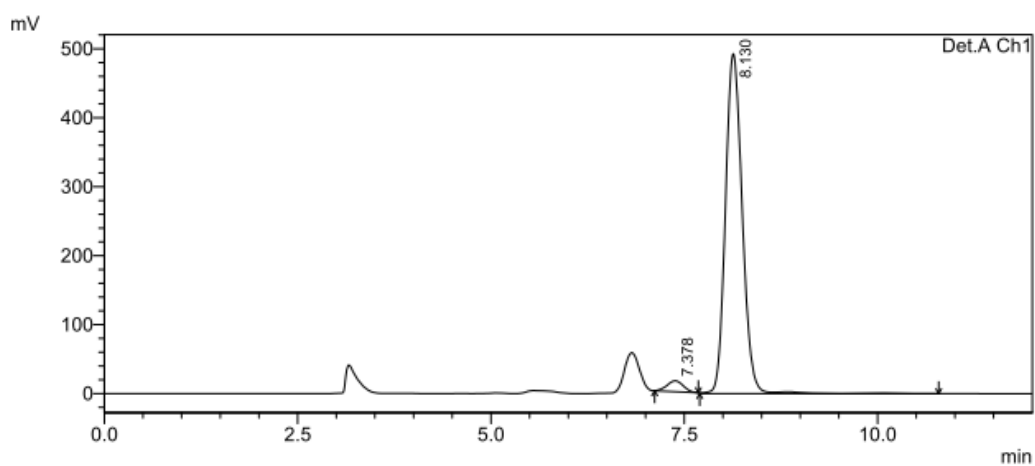

1 Det.A Ch1/210nm

PeakTable

| Detector A Ch1 210nm |           |         |        |         |          |
|----------------------|-----------|---------|--------|---------|----------|
| Peak#                | Ret. Time | Area    | Height | Area %  | Height % |
| 1                    | 7.378     | 229158  | 15775  | 2.981   | 3.100    |
| 2                    | 8.130     | 7457421 | 493100 | 97.019  | 96.900   |
| Total                |           | 7686579 | 508875 | 100.000 | 100.000  |



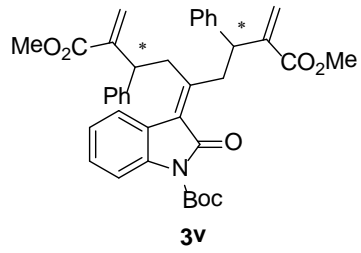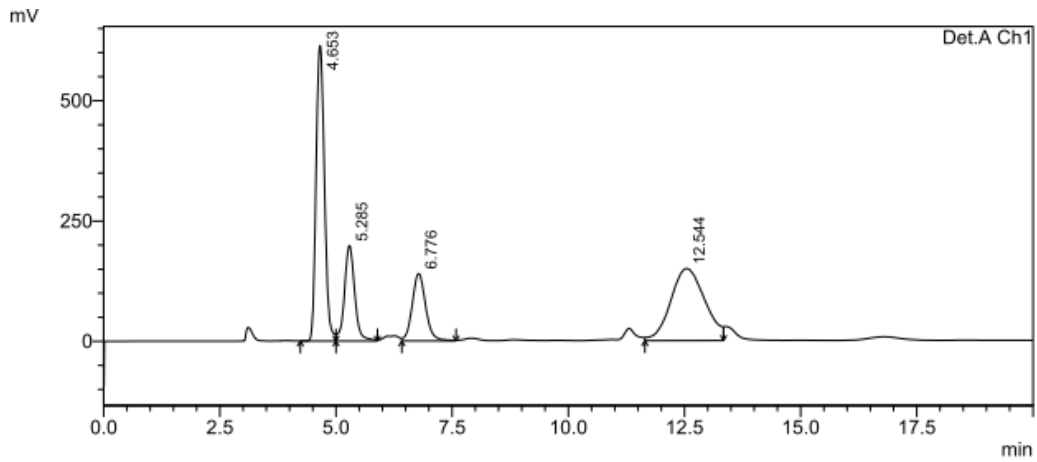

1 Det.A Ch1/210nm

PeakTable

| Detector A Ch1 210nm |           |          |         |         |          |
|----------------------|-----------|----------|---------|---------|----------|
| Peak#                | Ret. Time | Area     | Height  | Area %  | Height % |
| 1                    | 4.653     | 7688442  | 614390  | 36.304  | 55.721   |
| 2                    | 5.285     | 3034077  | 198317  | 14.327  | 17.986   |
| 3                    | 6.776     | 2816944  | 140034  | 13.301  | 12.700   |
| 4                    | 12.544    | 7638508  | 149884  | 36.068  | 13.593   |
| Total                |           | 21177972 | 1102625 | 100.000 | 100.000  |

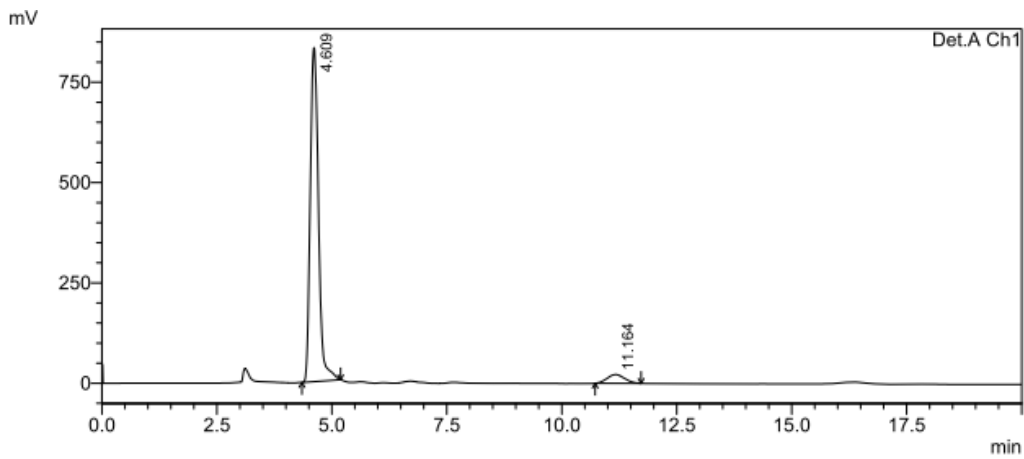

1 Det.A Ch1/210nm

PeakTable

| Detector A Ch1 210nm |           |          |        |         |          |
|----------------------|-----------|----------|--------|---------|----------|
| Peak#                | Ret. Time | Area     | Height | Area %  | Height % |
| 1                    | 4.609     | 10362528 | 832227 | 94.741  | 97.438   |
| 2                    | 11.164    | 575211   | 21885  | 5.259   | 2.562    |
| Total                |           | 10937738 | 854112 | 100.000 | 100.000  |

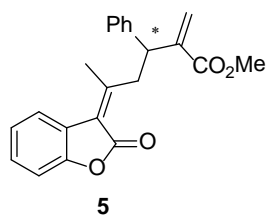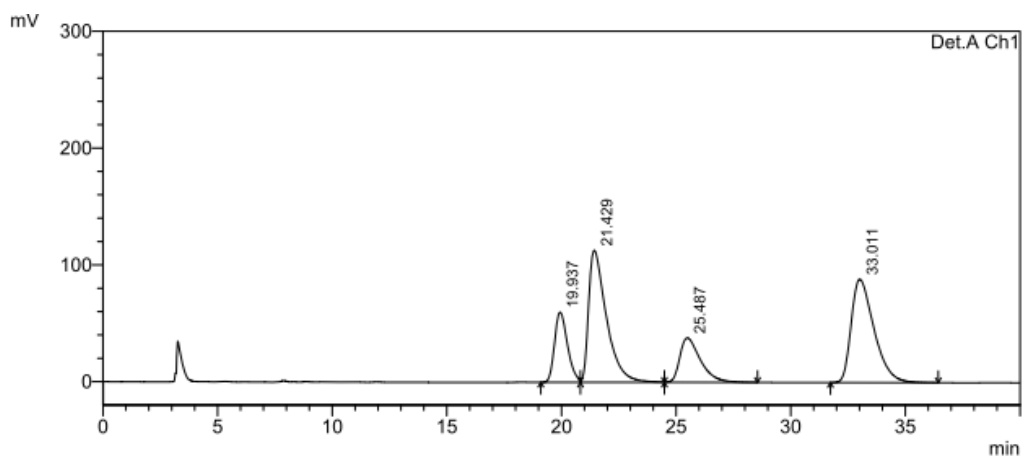

1 Det.A Ch1/210nm

PeakTable

Detector A Ch1 210nm

| Peak# | Ret. Time | Area     | Height | Area %  | Height % |
|-------|-----------|----------|--------|---------|----------|
| 1     | 19.937    | 2361322  | 60161  | 13.899  | 20.074   |
| 2     | 21.429    | 6118592  | 113027 | 36.016  | 37.713   |
| 3     | 25.487    | 2384480  | 38067  | 14.036  | 12.702   |
| 4     | 33.011    | 6124376  | 88449  | 36.050  | 29.512   |
| Total |           | 16988770 | 299705 | 100.000 | 100.000  |

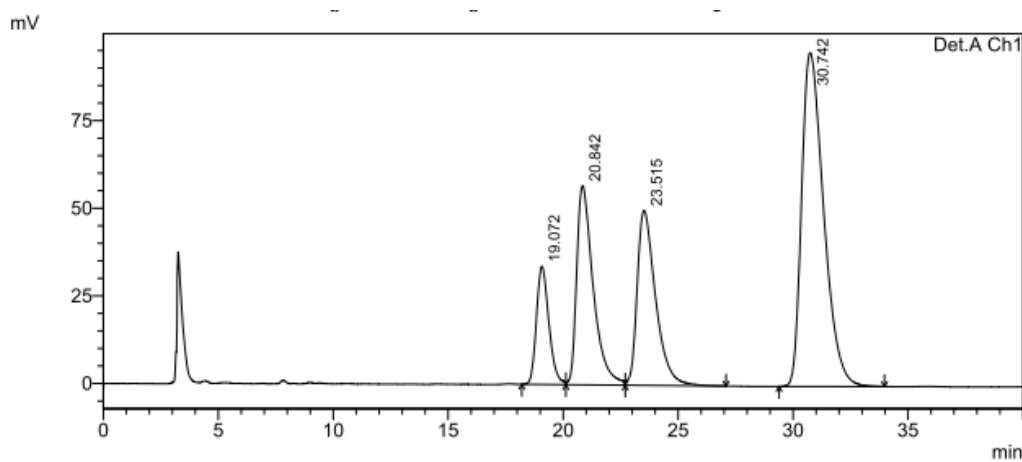

1 Det.A Ch1/210nm

PeakTable

Detector A Ch1 210nm

| Peak# | Ret. Time | Area     | Height | Area %  | Height % |
|-------|-----------|----------|--------|---------|----------|
| 1     | 19.072    | 1267453  | 33712  | 9.581   | 14.303   |
| 2     | 20.842    | 2838193  | 56791  | 21.454  | 24.095   |
| 3     | 23.515    | 2783518  | 49903  | 21.041  | 21.172   |
| 4     | 30.742    | 6339857  | 95294  | 47.924  | 40.430   |
| Total |           | 13229021 | 235700 | 100.000 | 100.000  |

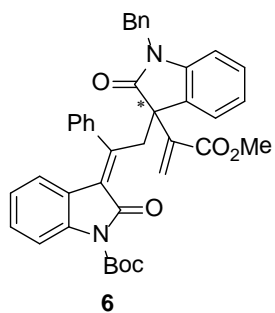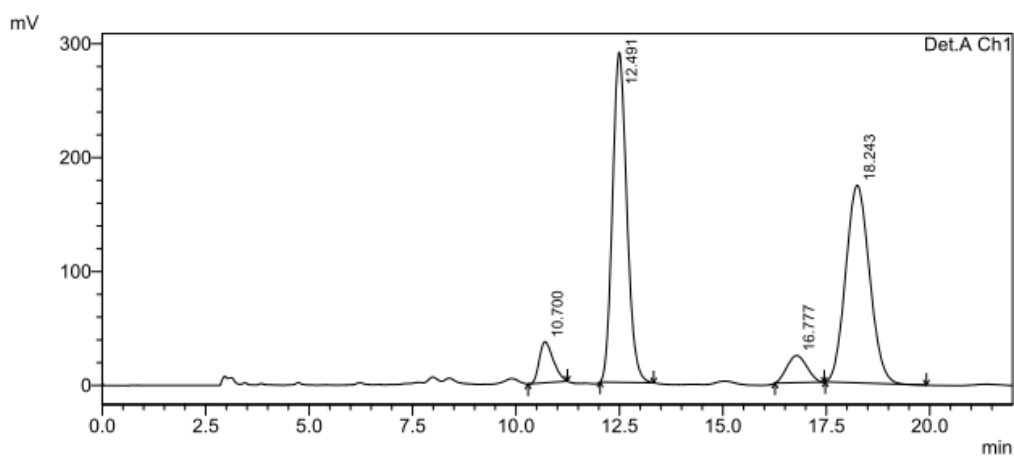

1 Det.A Ch1/210nm

PeakTable

| Peak# | Ret. Time | Area     | Height | Area %  | Height % |
|-------|-----------|----------|--------|---------|----------|
| 1     | 10.700    | 841683   | 36049  | 5.414   | 6.893    |
| 2     | 12.491    | 6969400  | 289753 | 44.830  | 55.406   |
| 3     | 16.777    | 794997   | 23748  | 5.114   | 4.541    |
| 4     | 18.243    | 6940352  | 173415 | 44.643  | 33.160   |
| Total |           | 15546432 | 522965 | 100.000 | 100.000  |

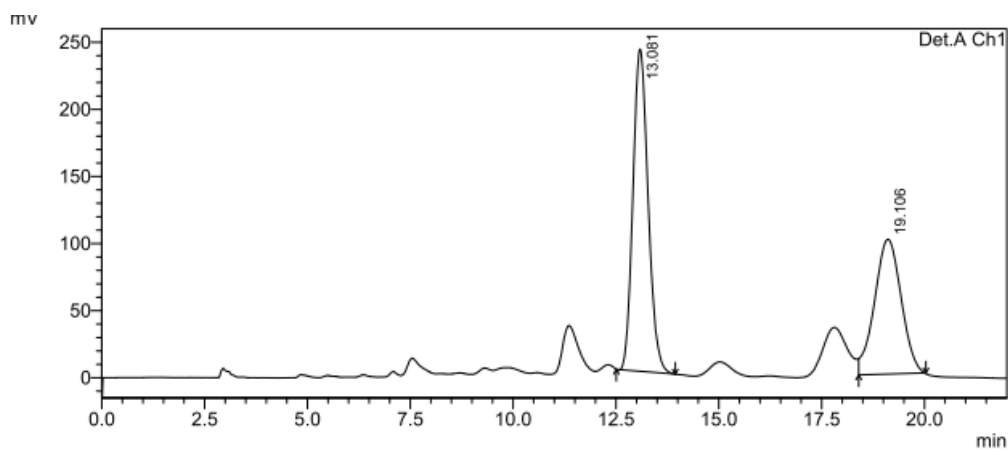

1 Det.A Ch1/210nm

PeakTable

| Peak# | Ret. Time | Area     | Height | Area %  | Height % |
|-------|-----------|----------|--------|---------|----------|
| 1     | 13.081    | 6141509  | 240003 | 57.675  | 70.500   |
| 2     | 19.106    | 4506884  | 100426 | 42.325  | 29.500   |
| Total |           | 10648394 | 340429 | 100.000 | 100.000  |
